# Supplementary figures and images for: Synthesis of 2-benzyl benzoxazoles and benzothiazoles via elemental sulfur promoted cyclization of styrenes with 2-nitrophenols and N,N-dialkyl-3-nitroanilines
Source: Royal Society of Chemistry journal article supplement (doi:10.1039/d3ob01775c), 2024-01-01

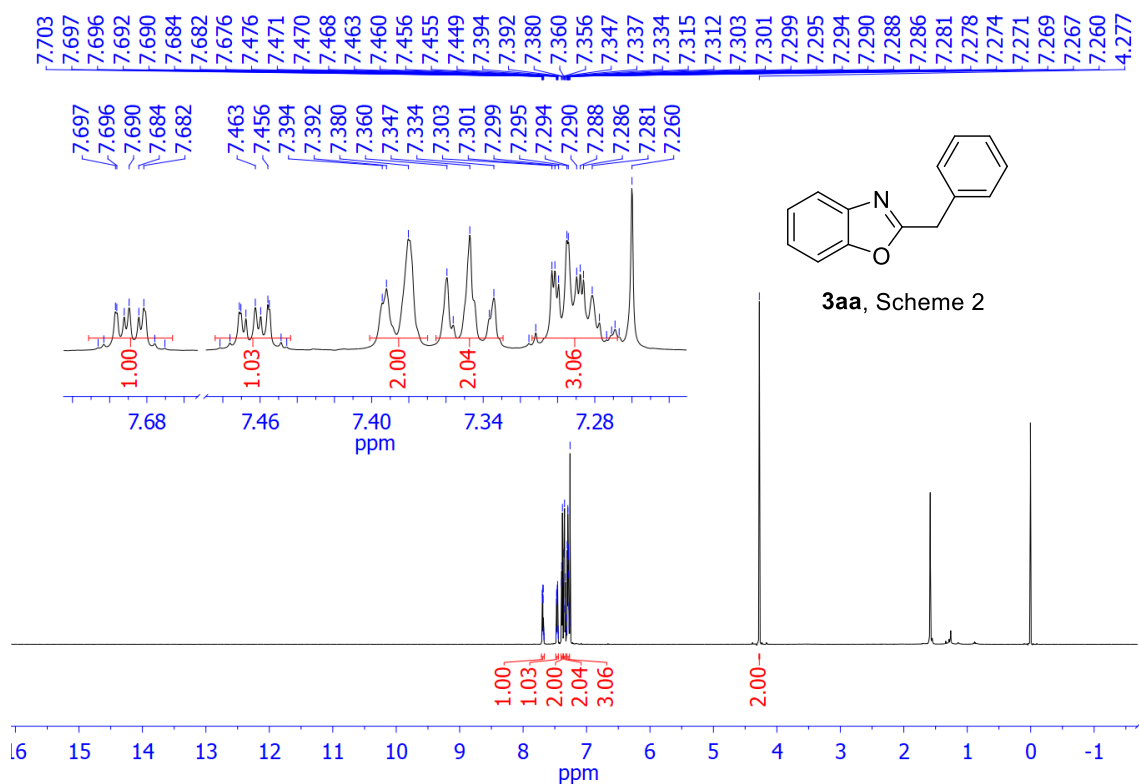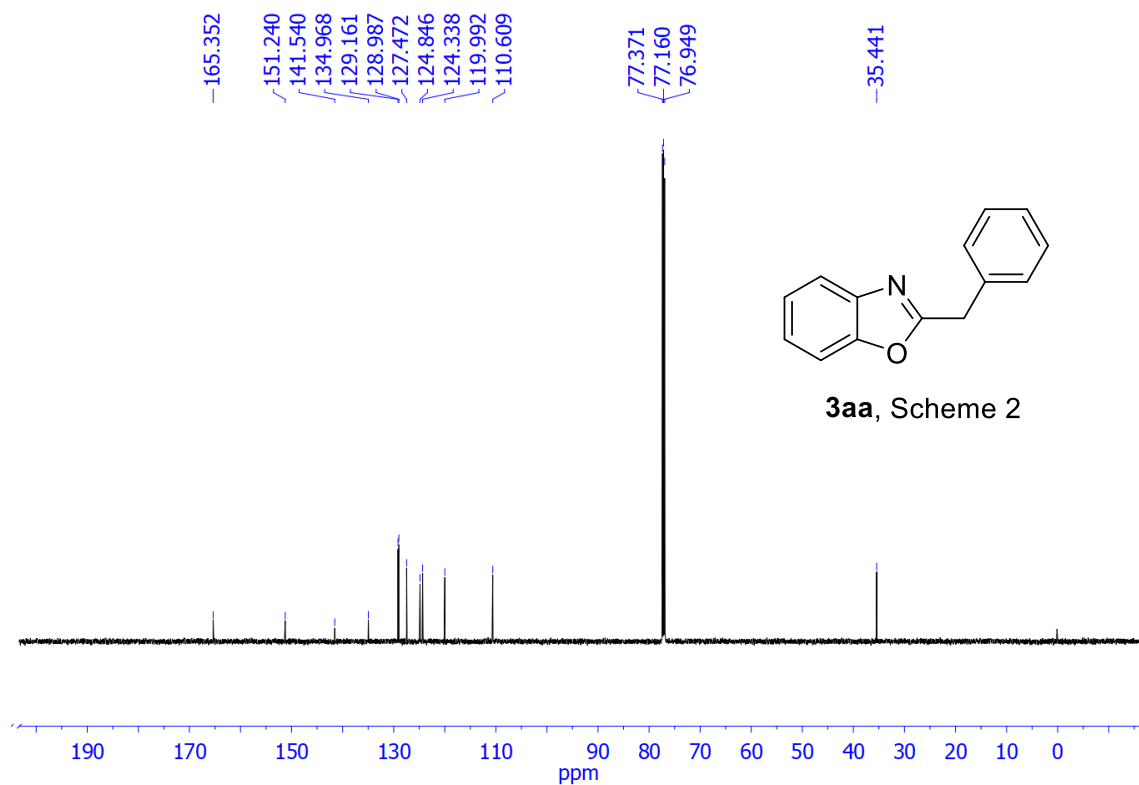

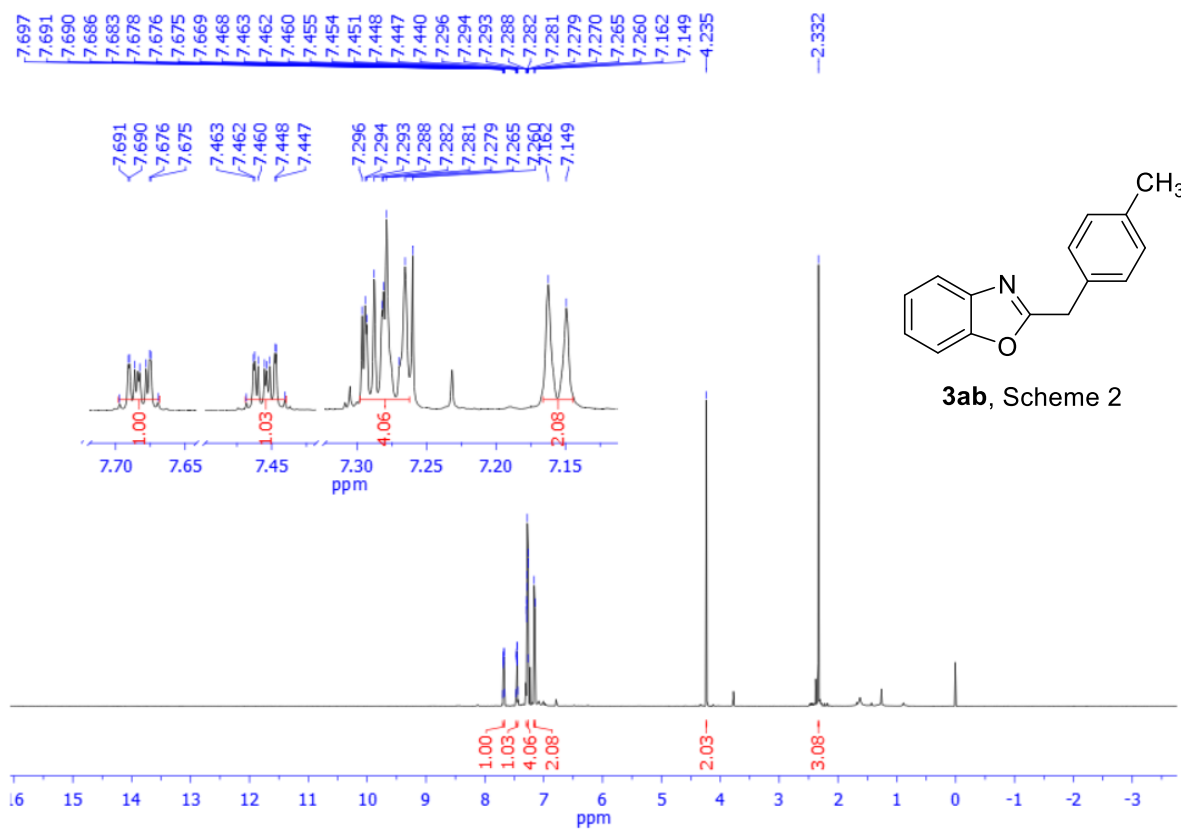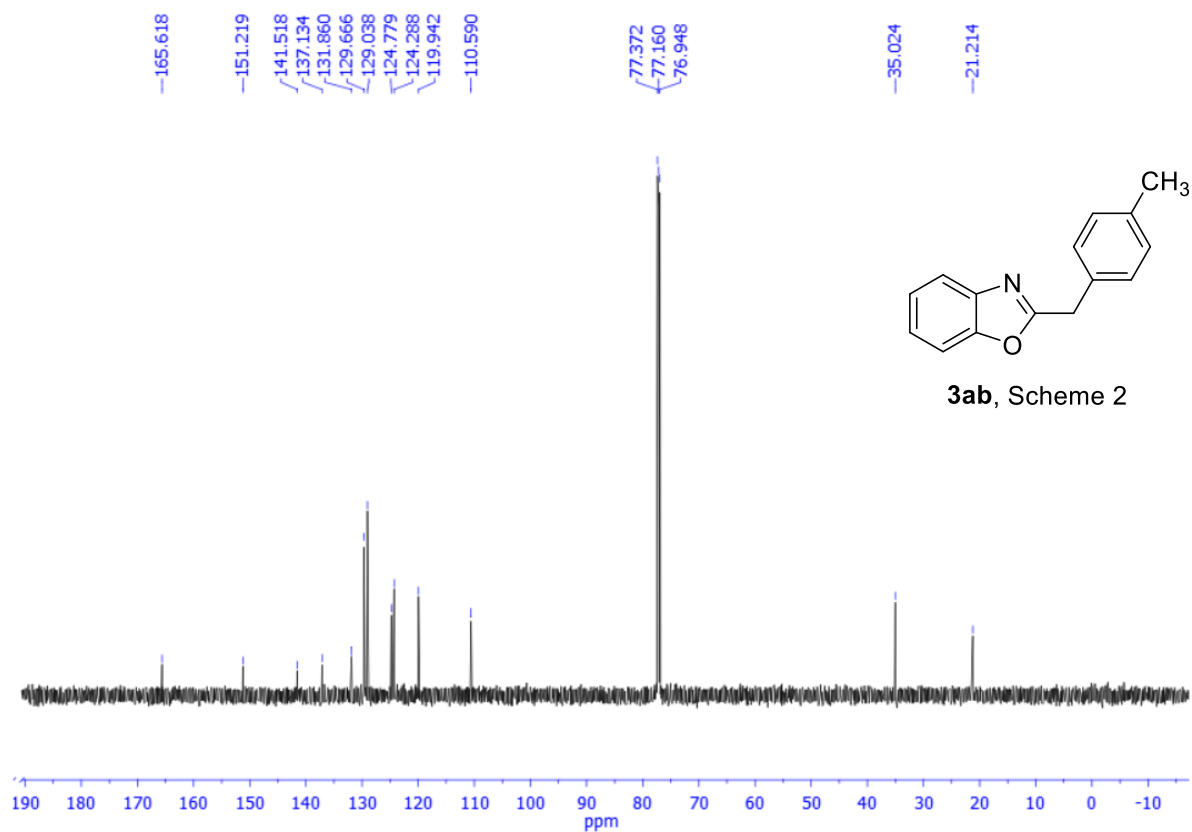

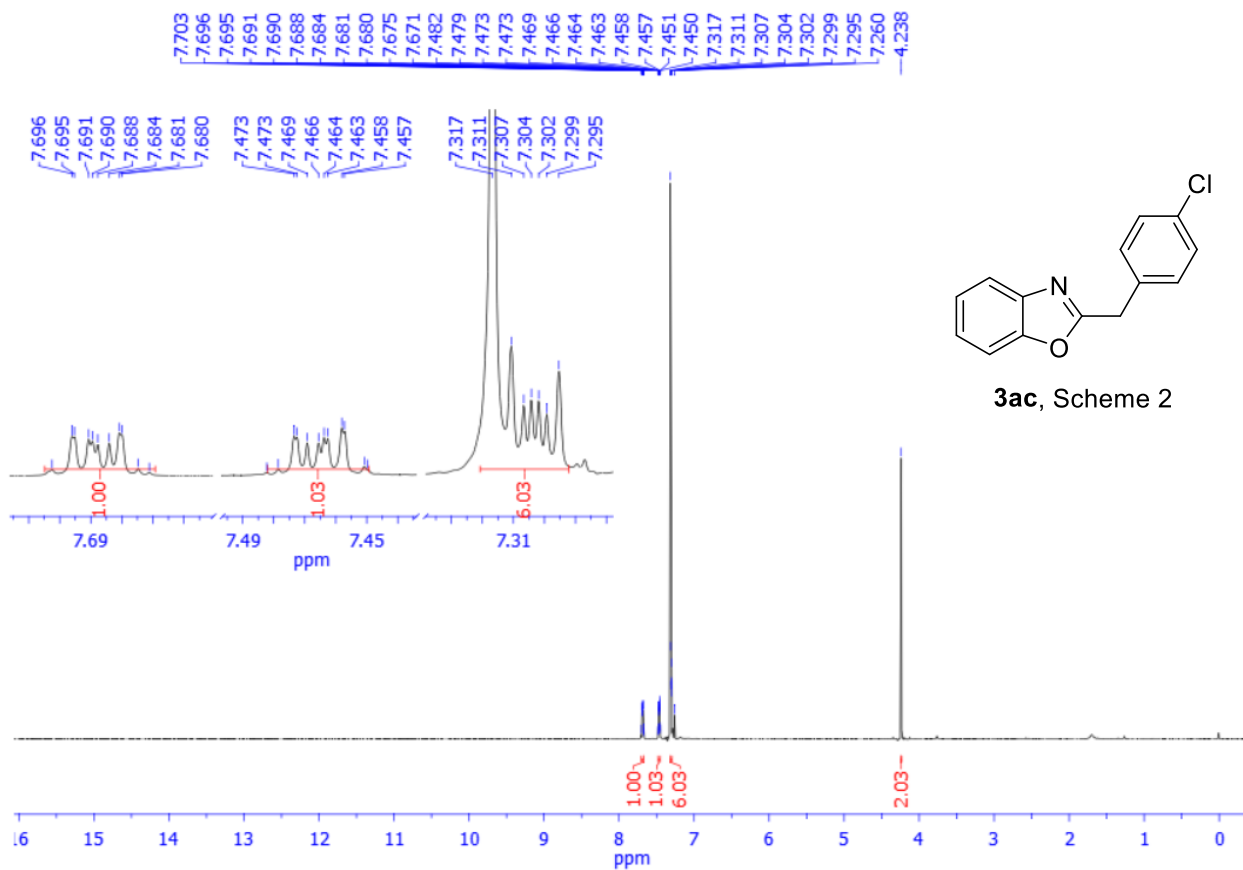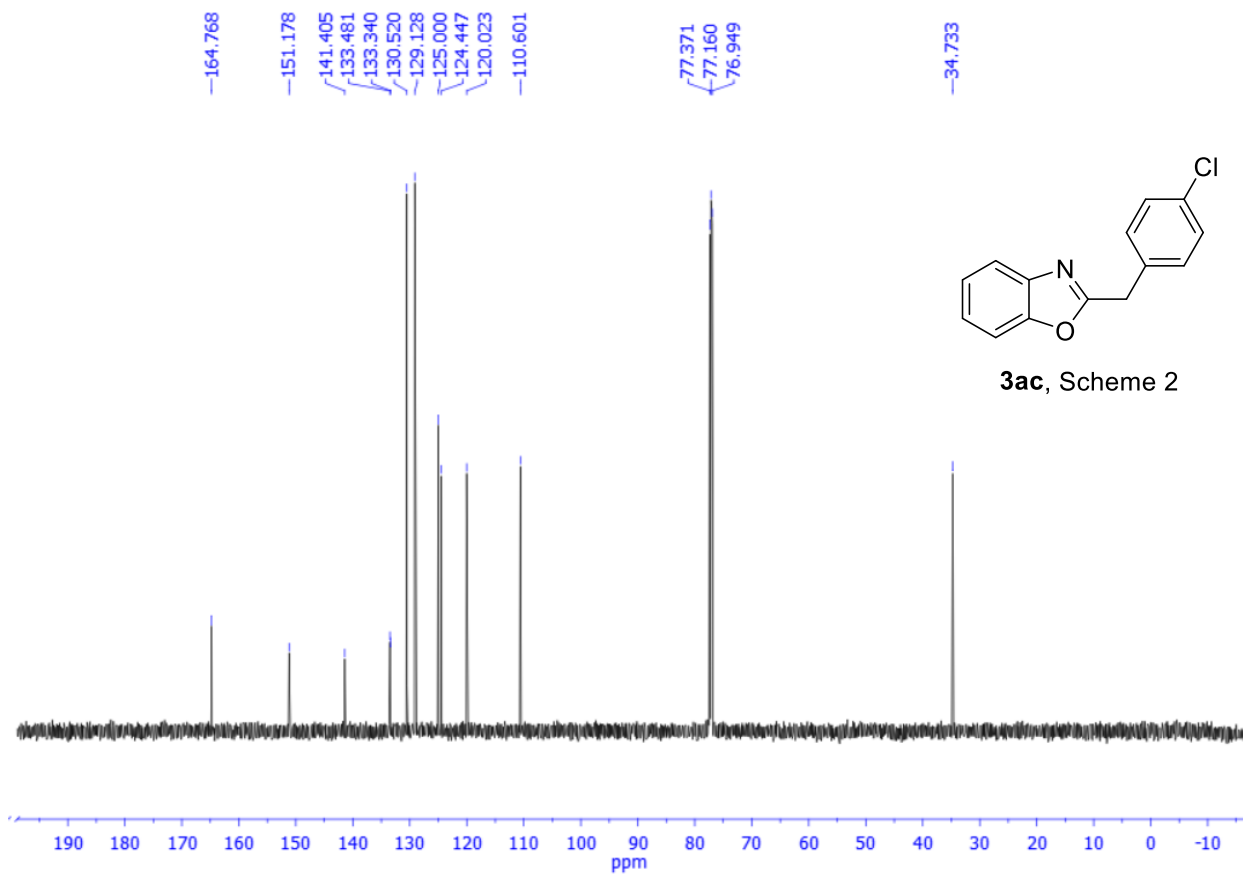

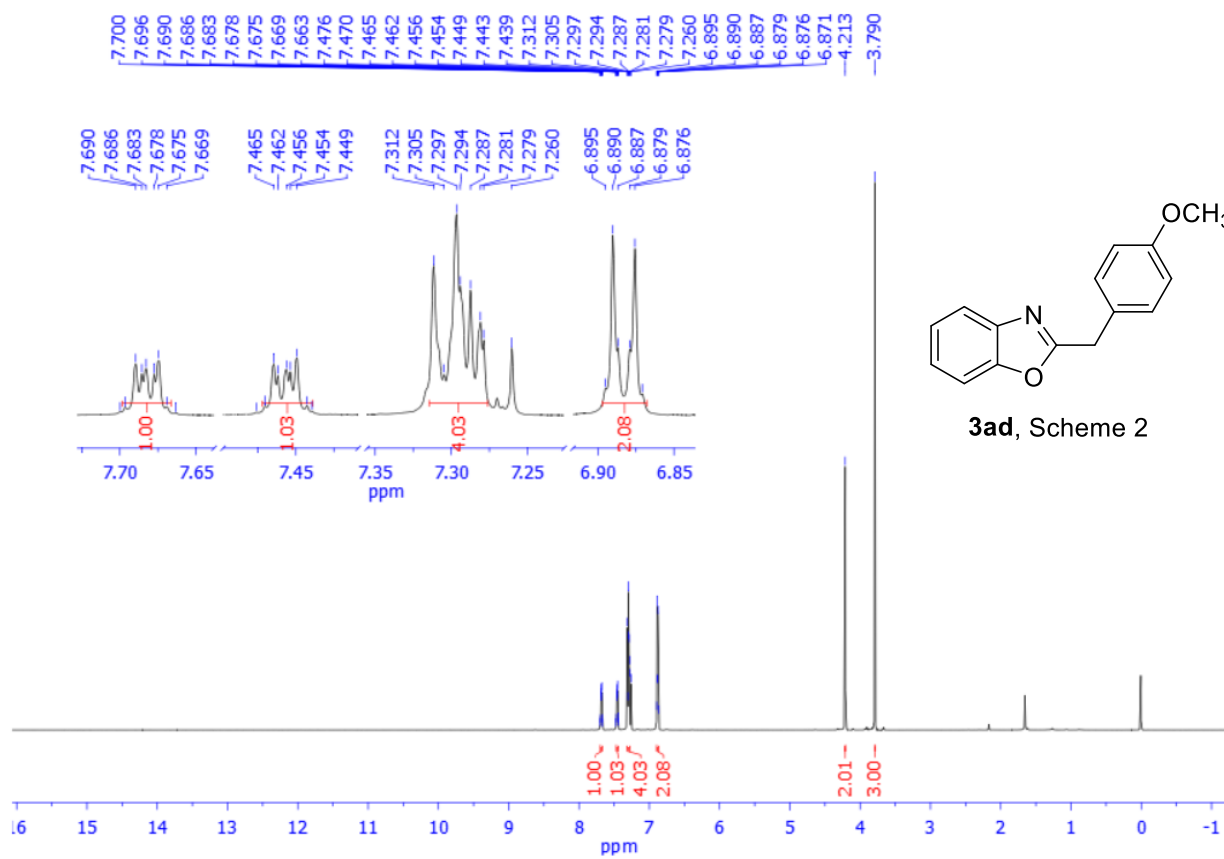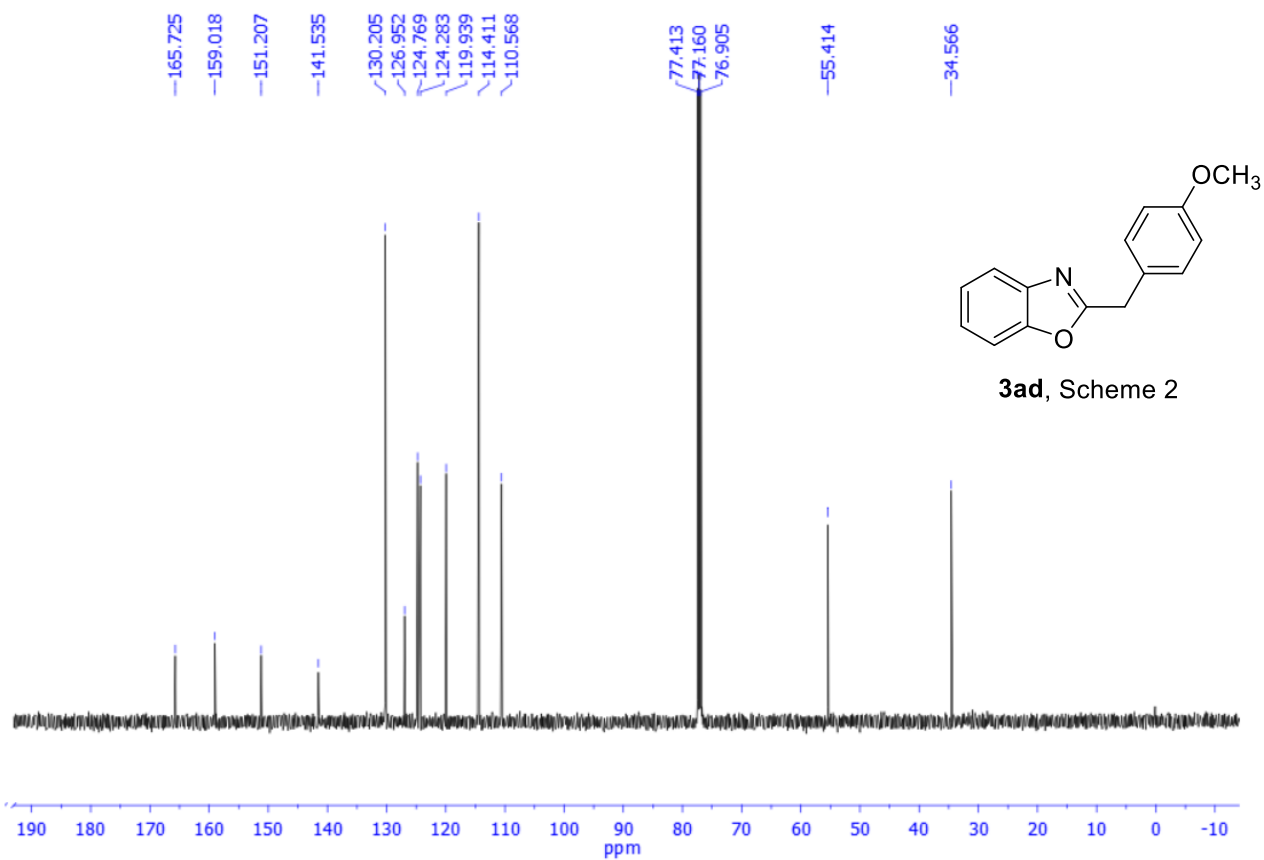

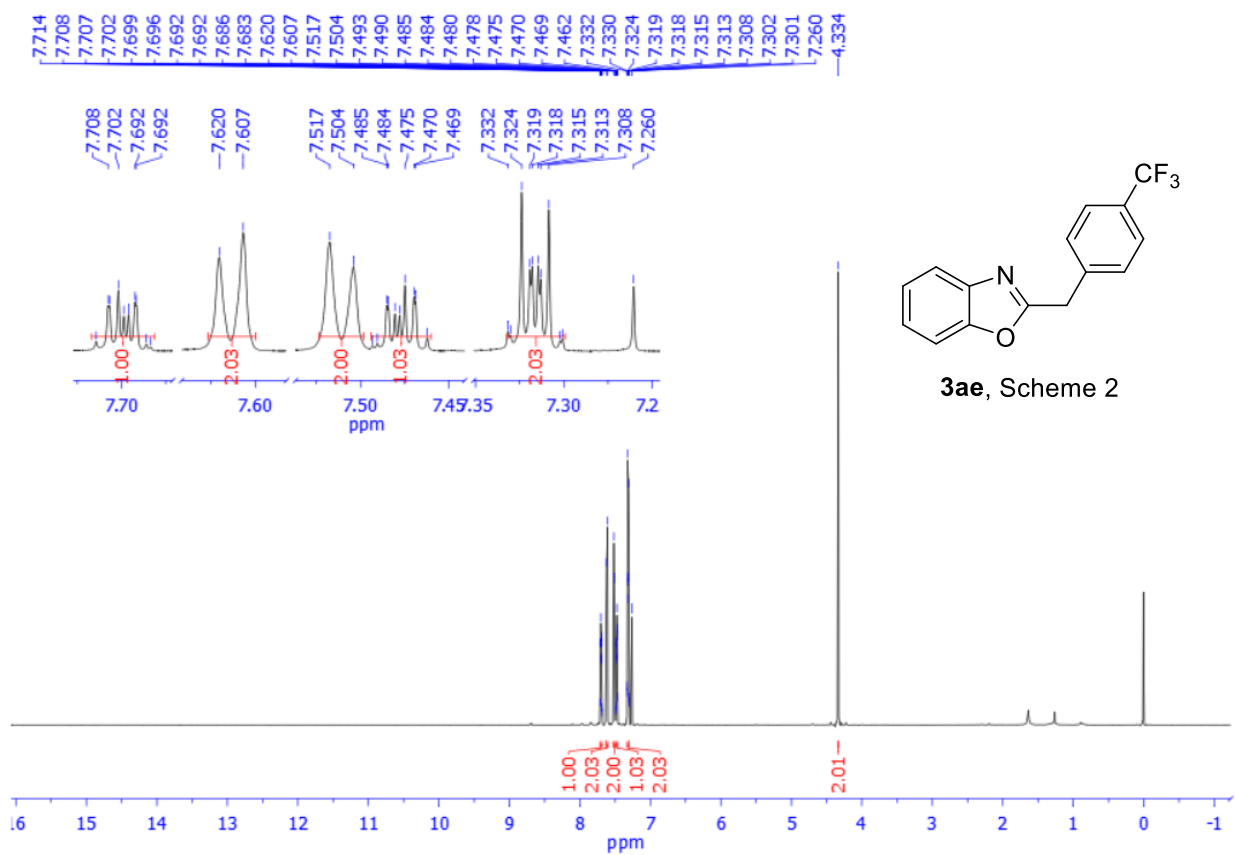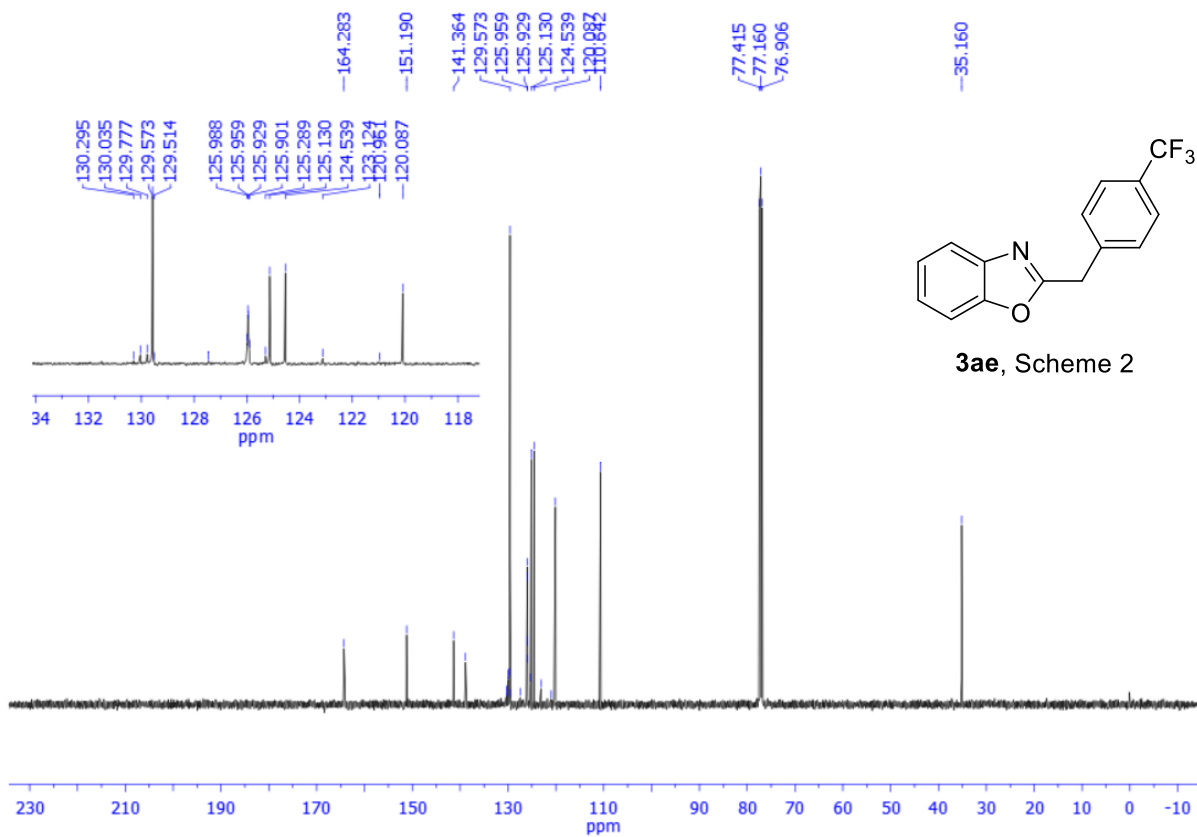

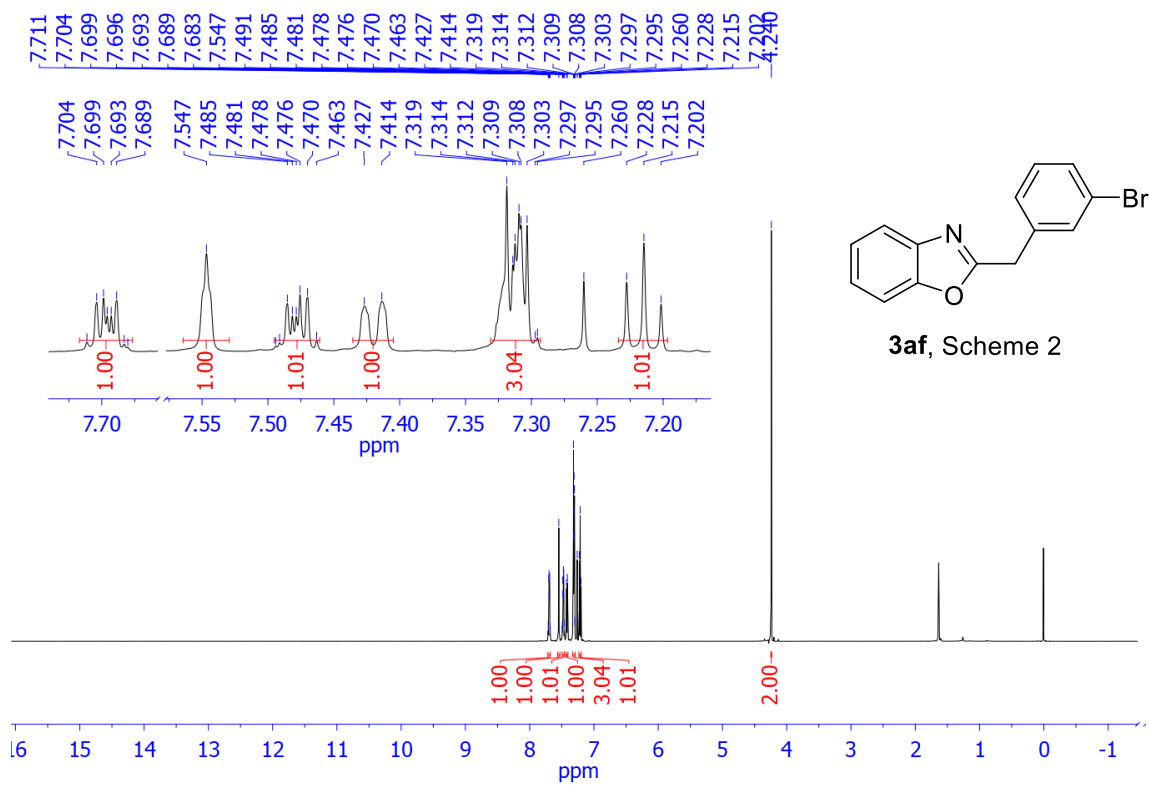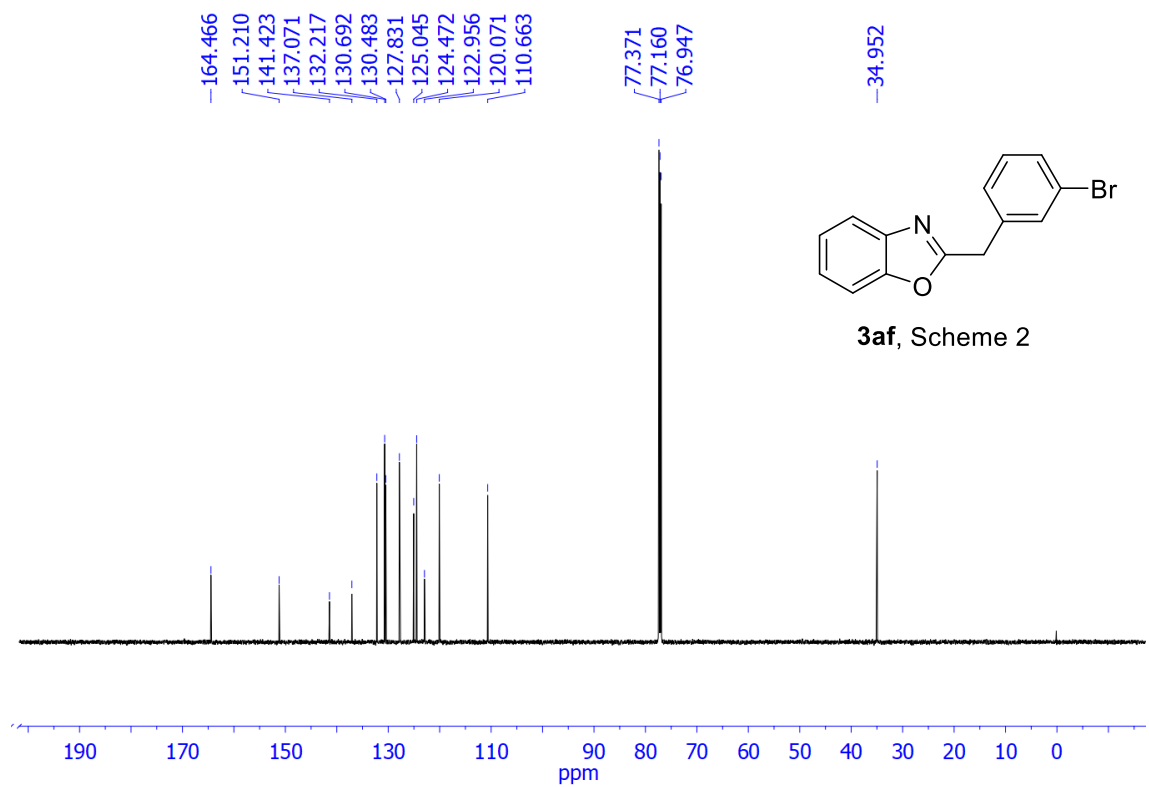

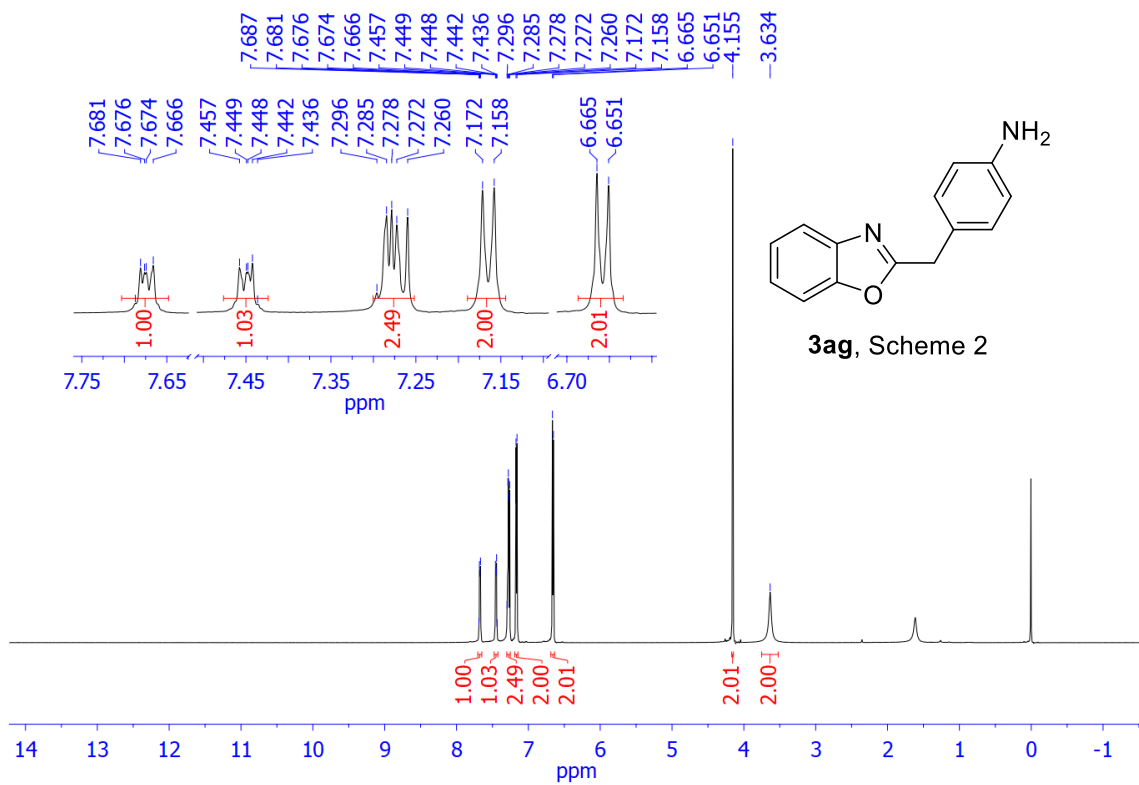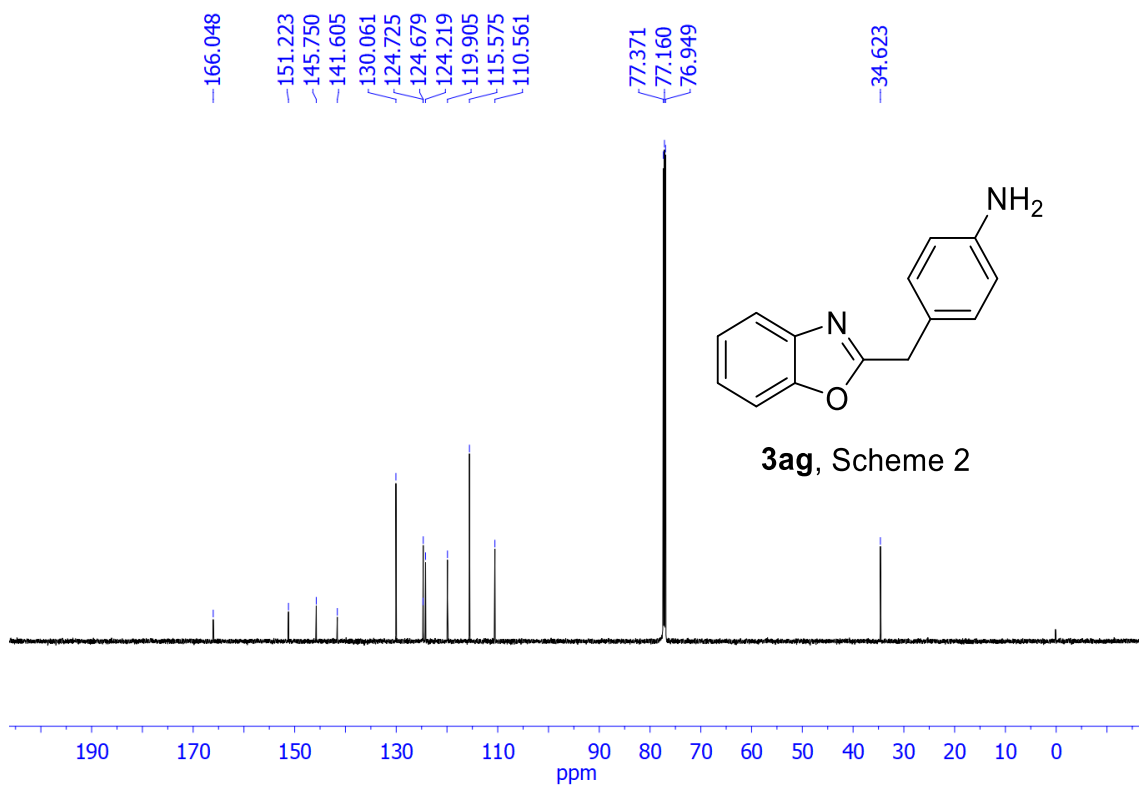

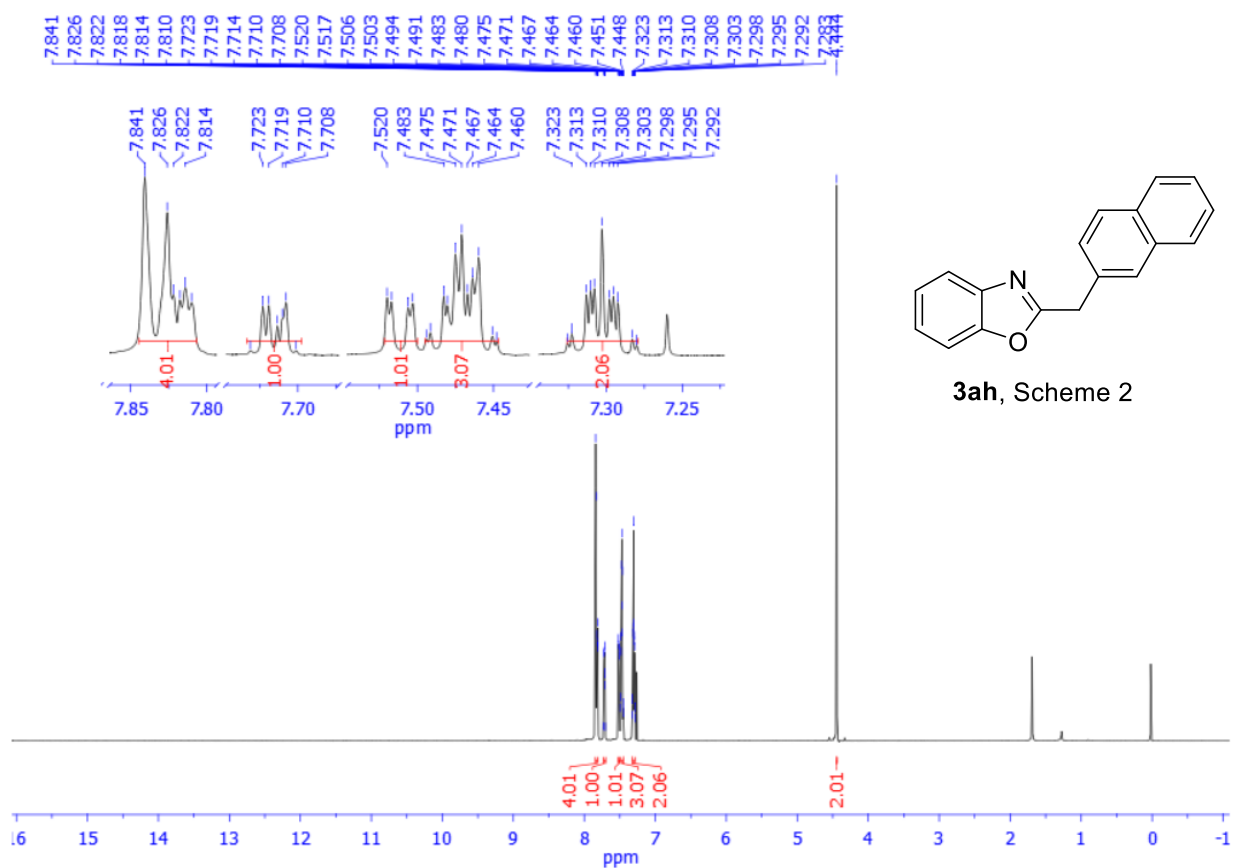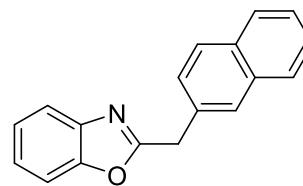

**3ah, Scheme 2**

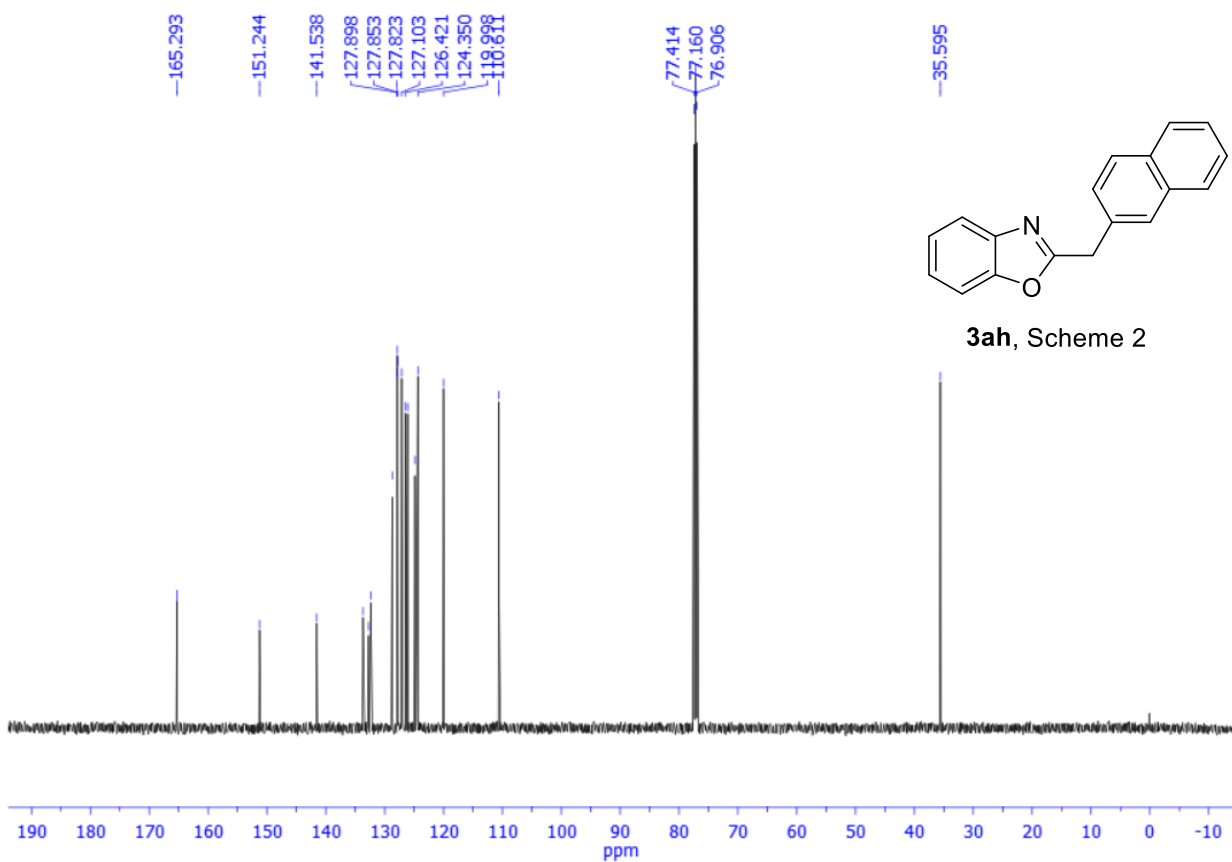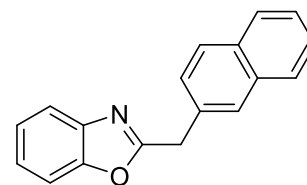

**3ah, Scheme 2**



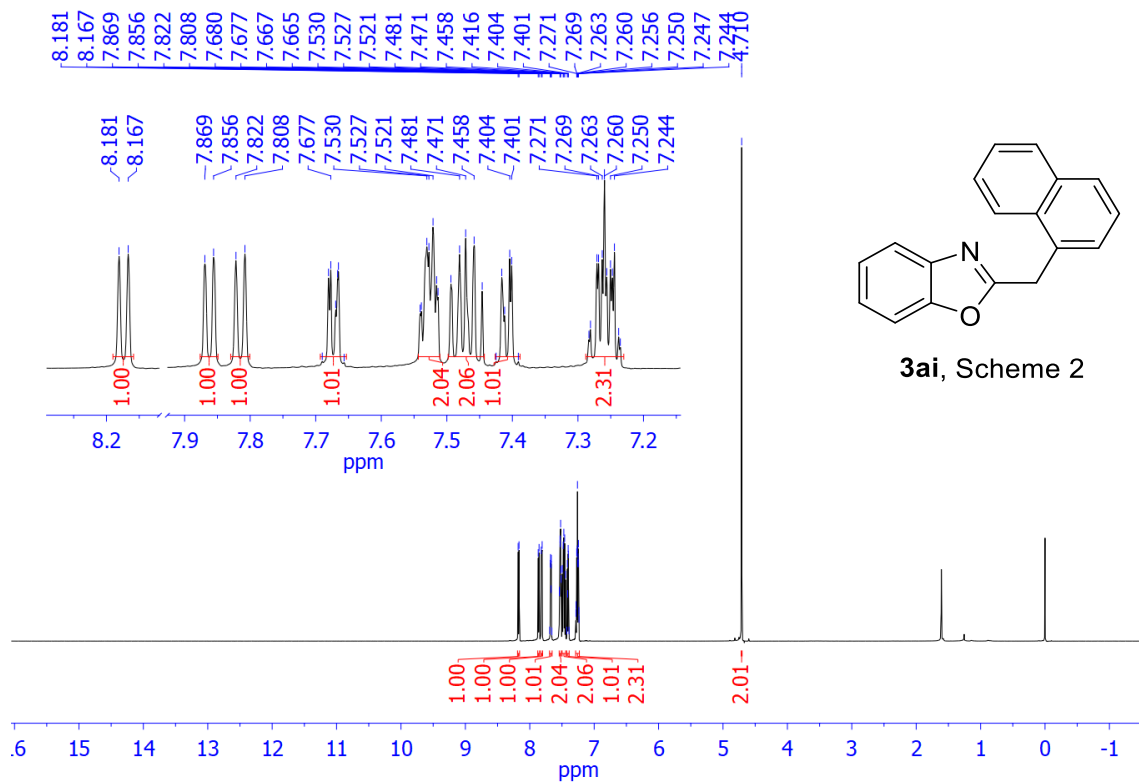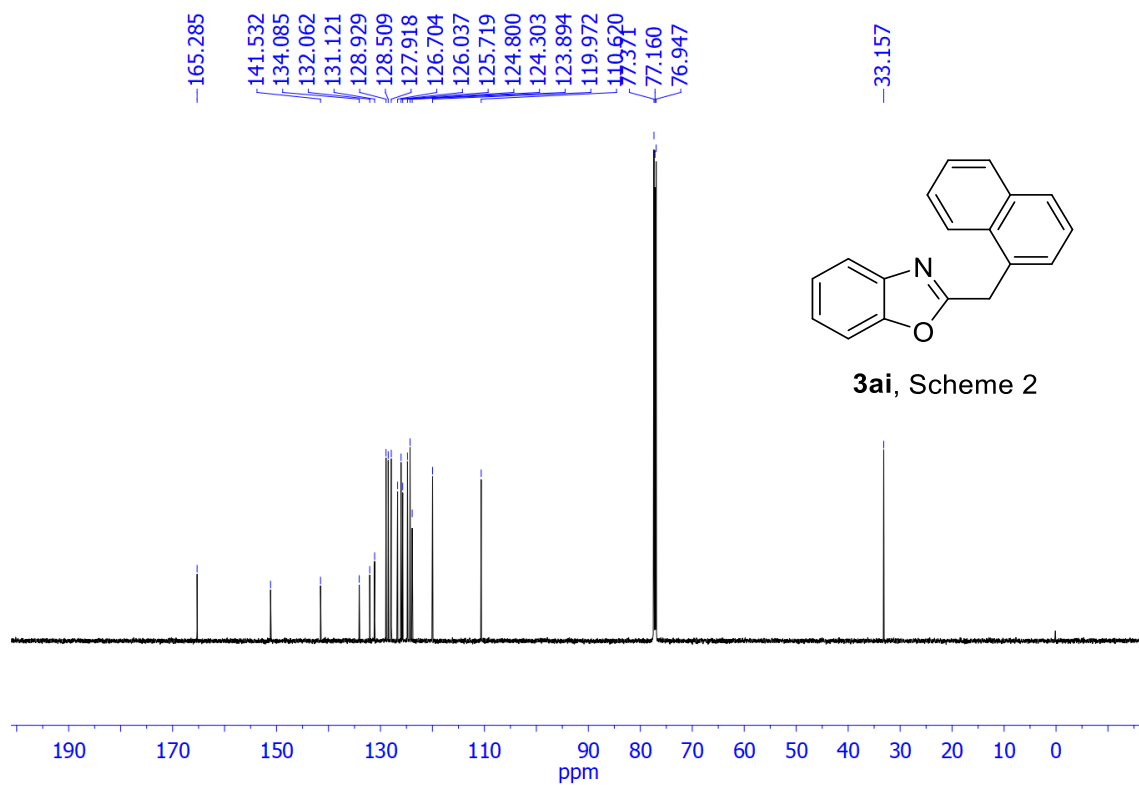

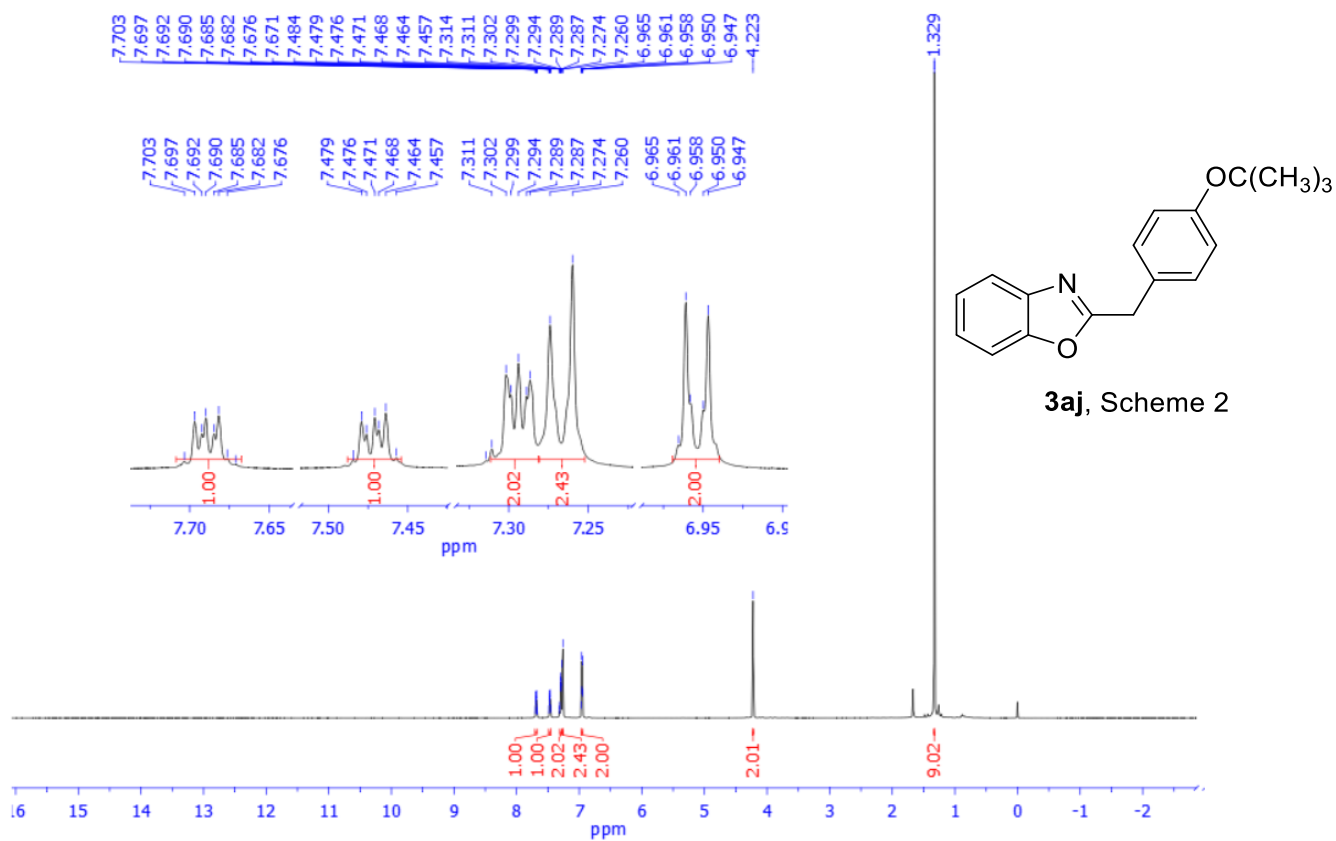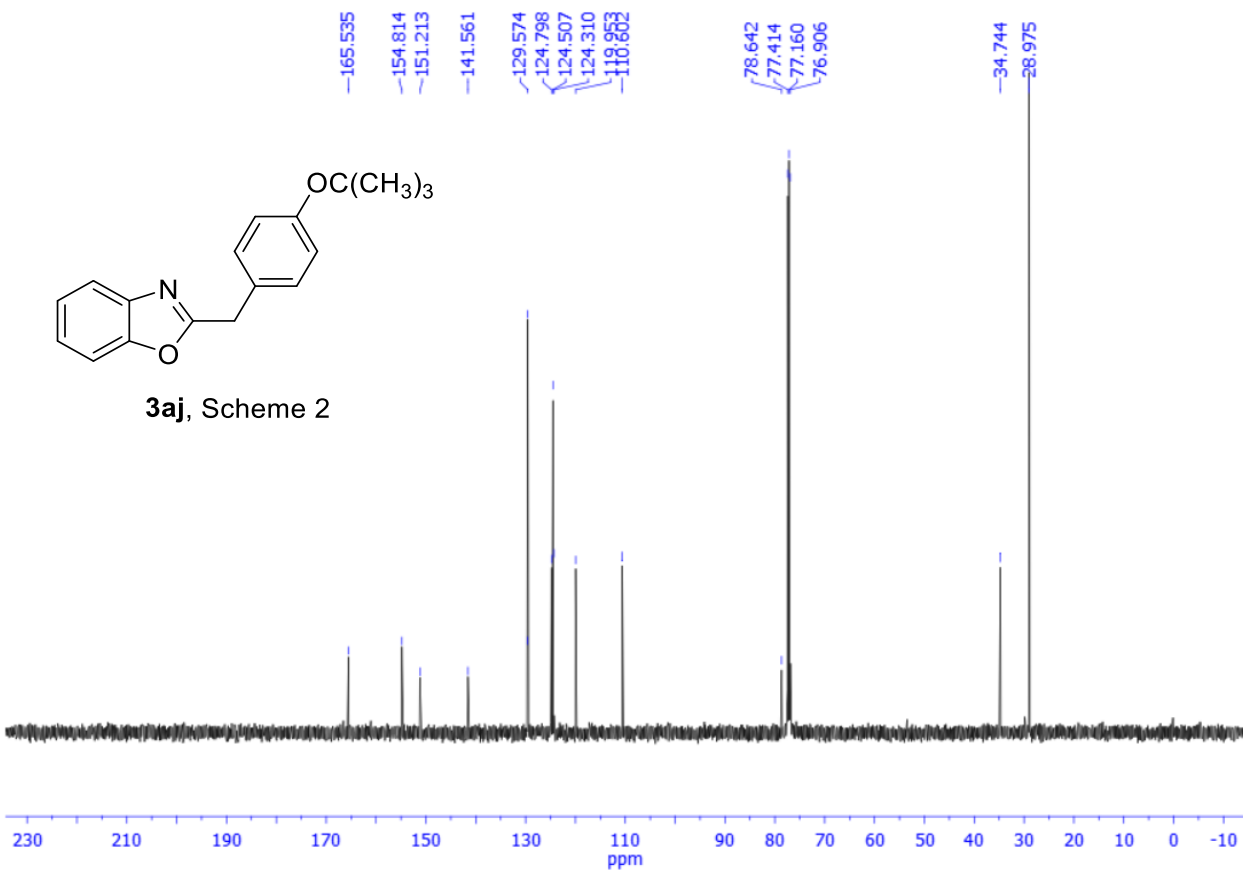

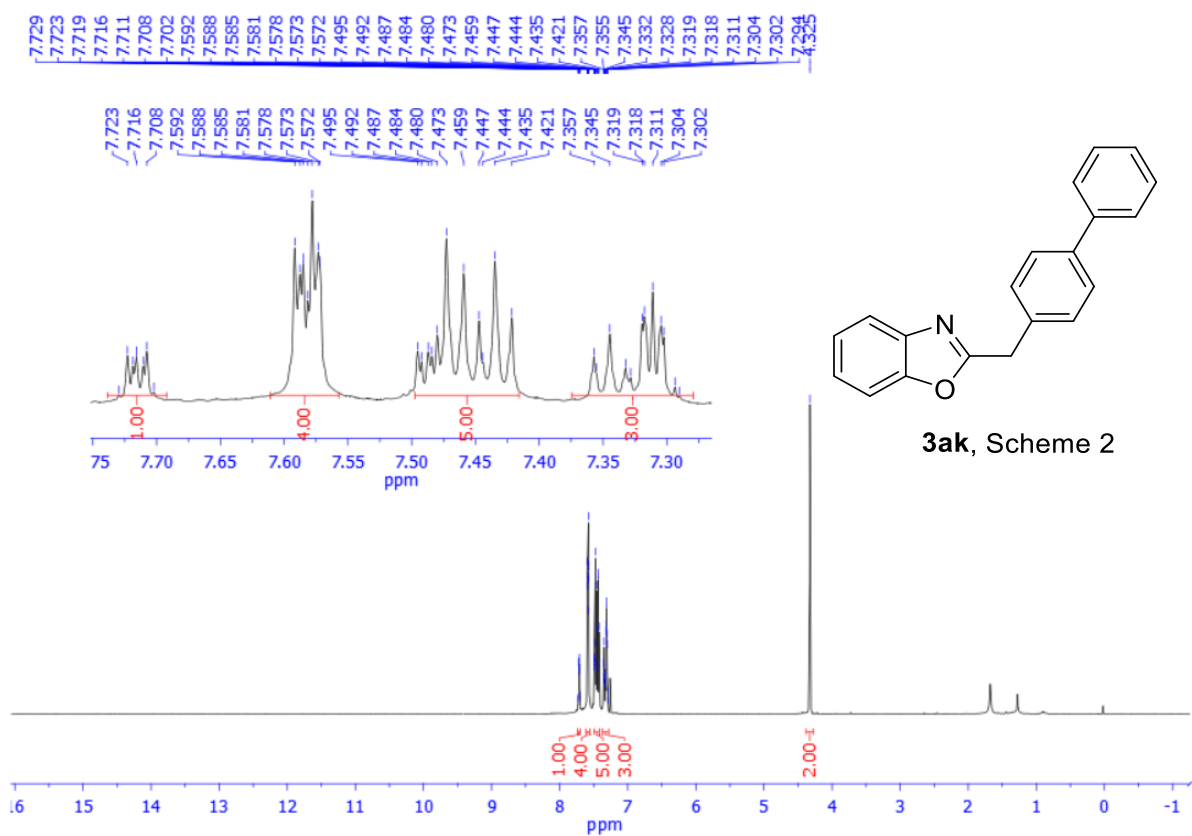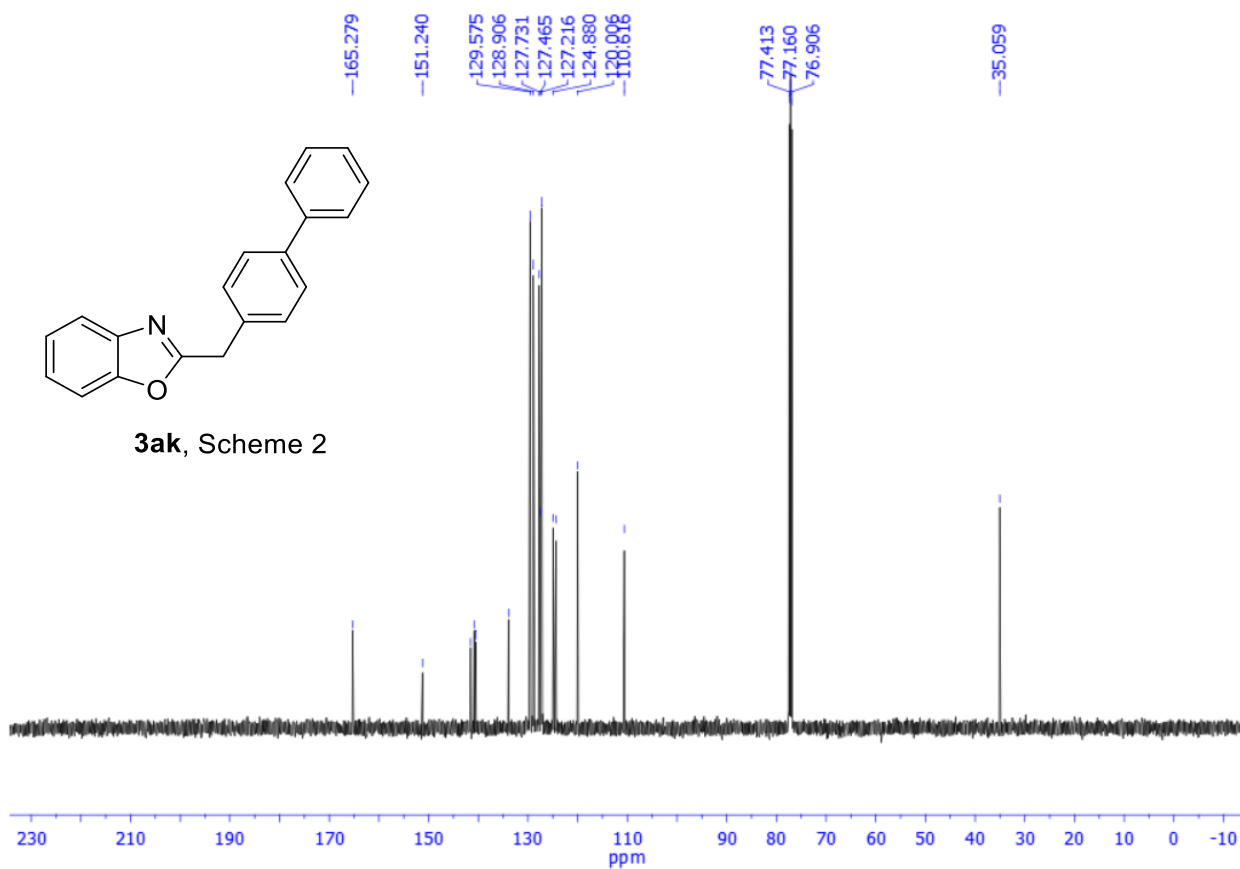

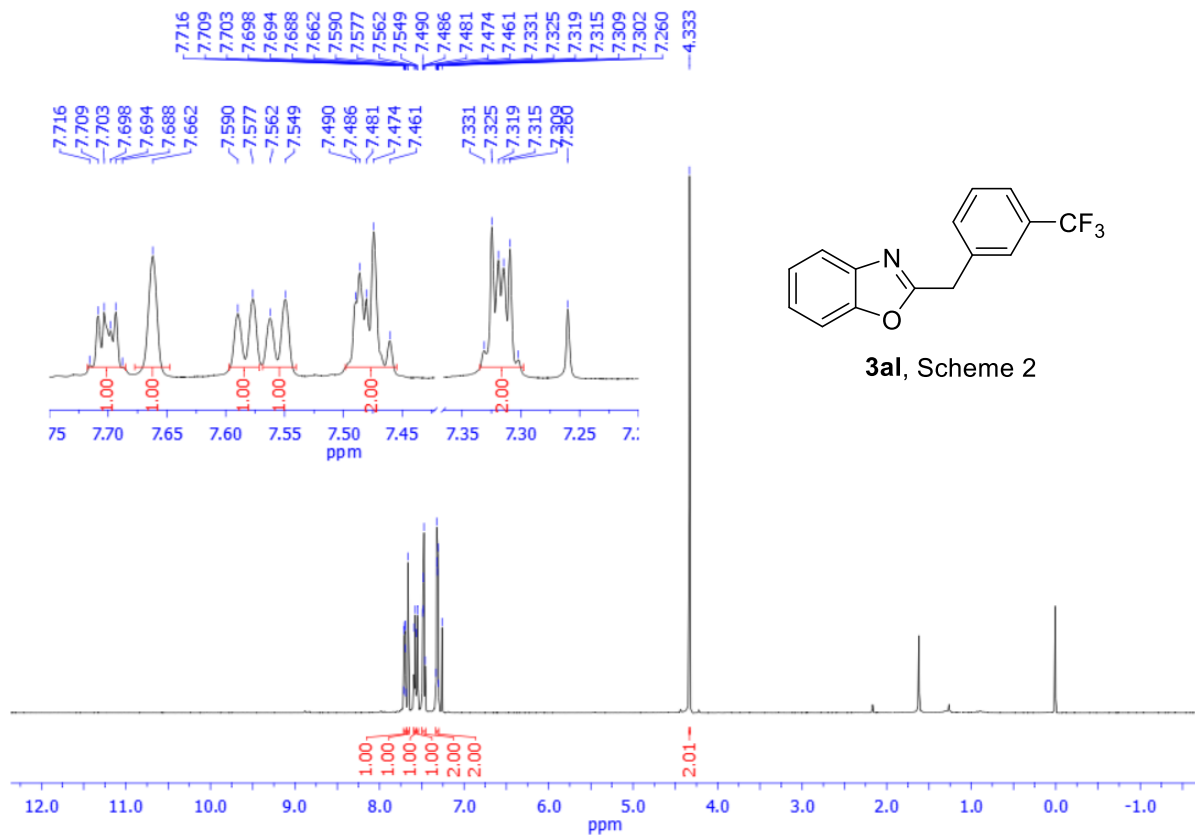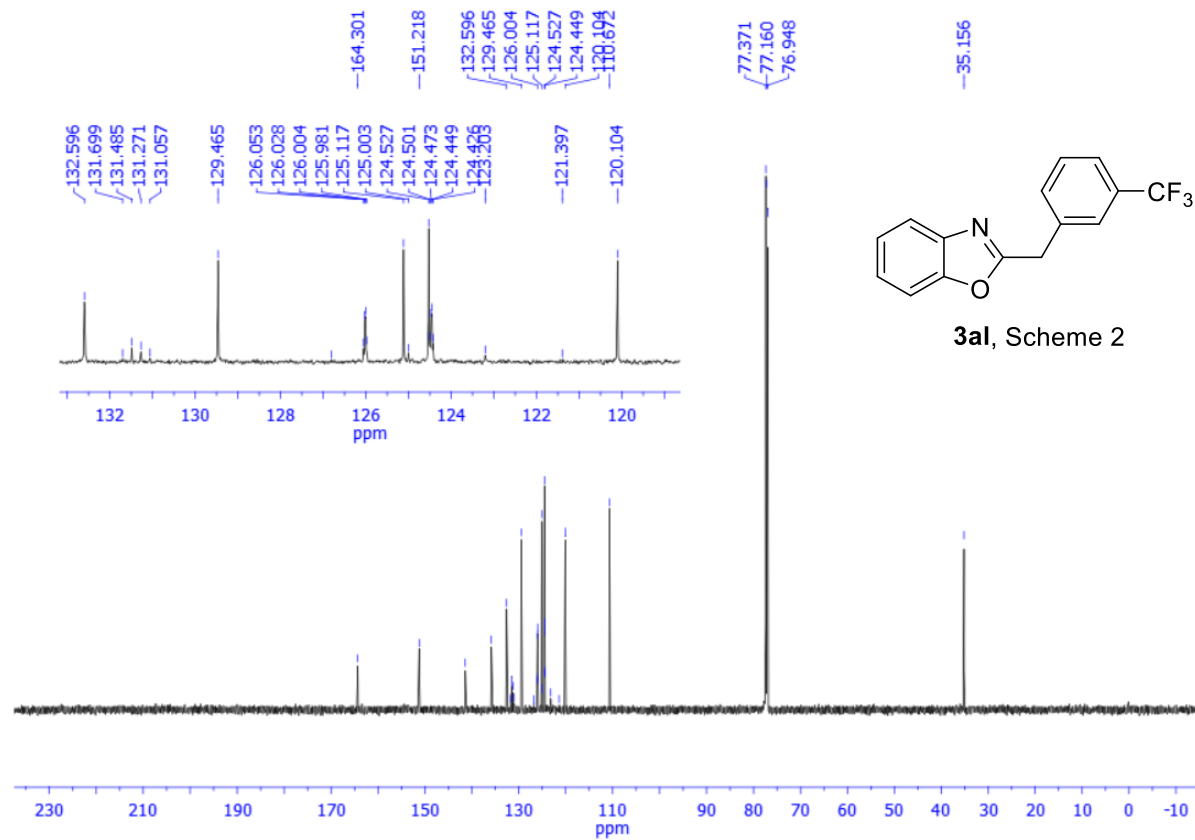

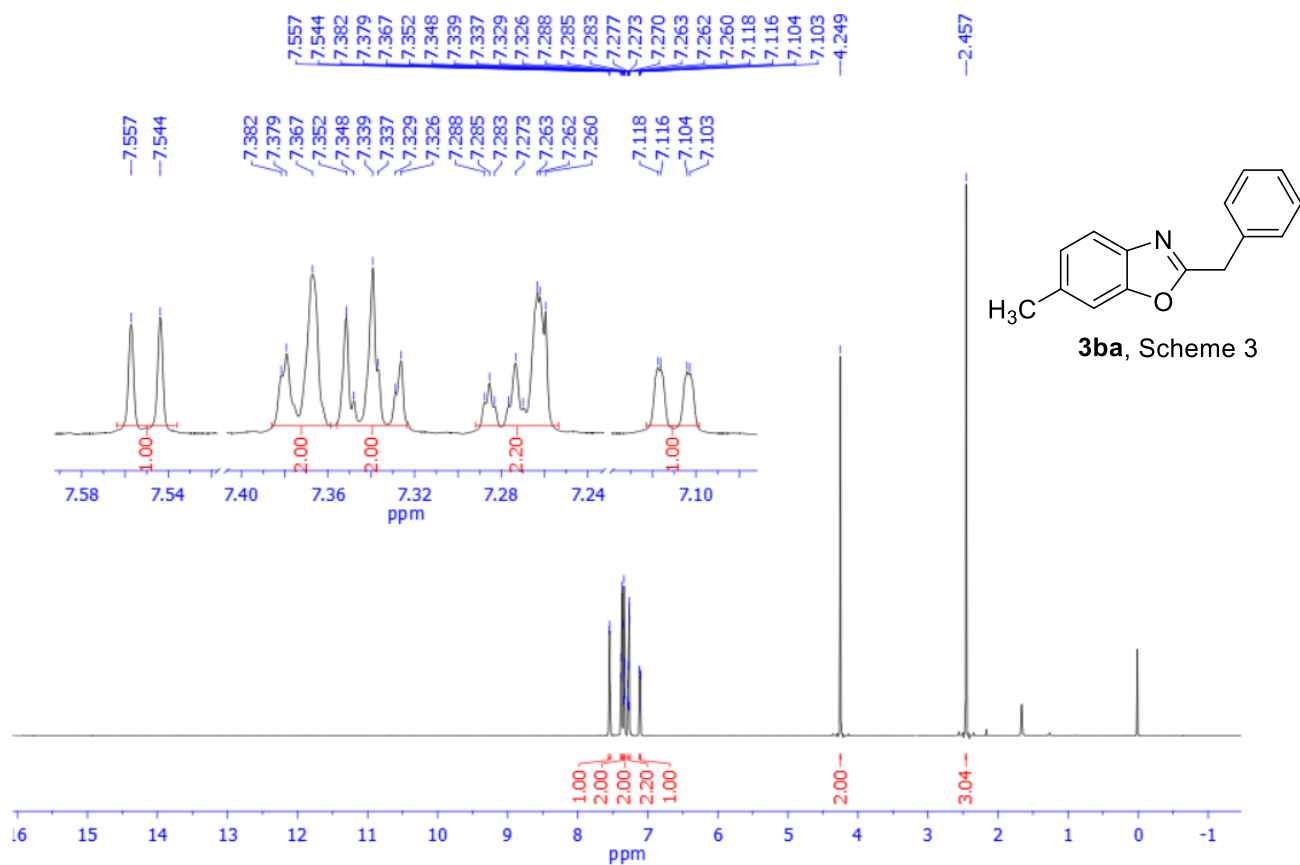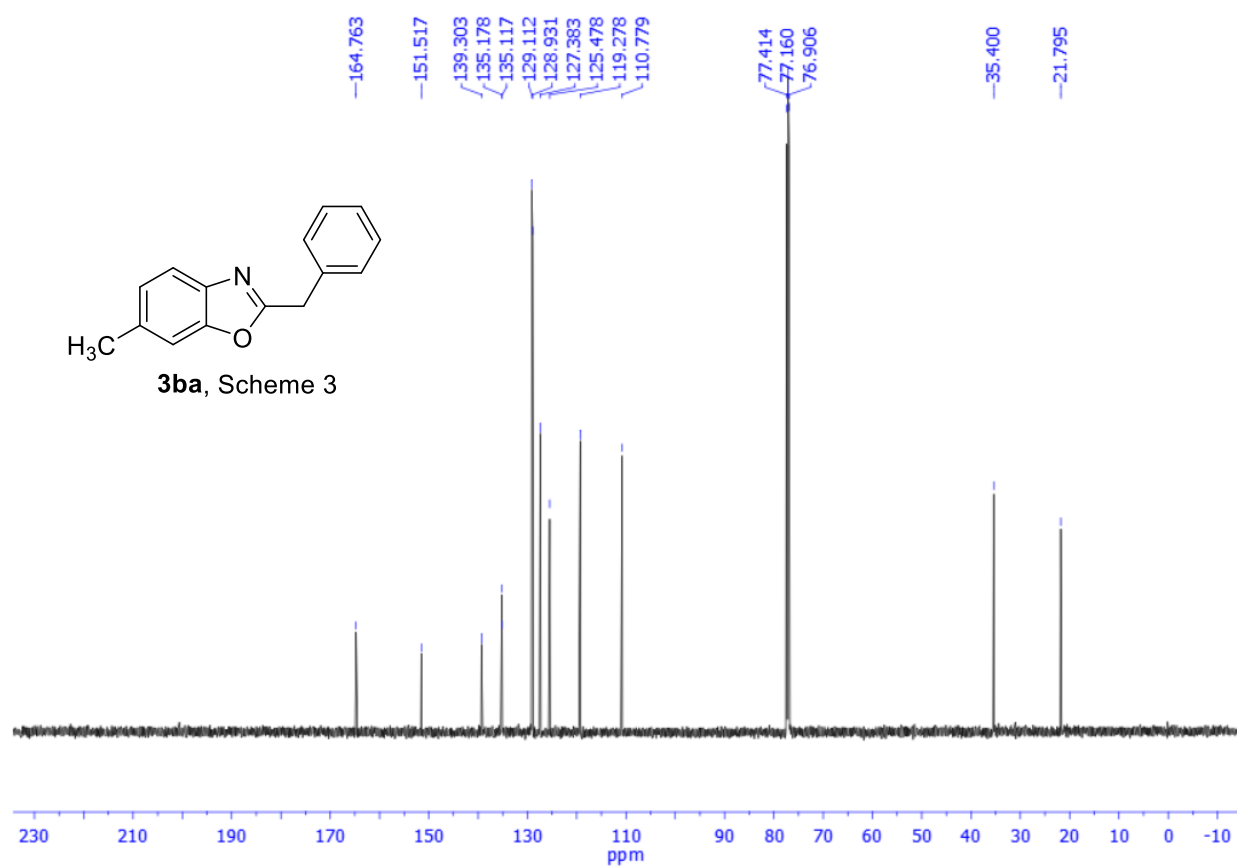

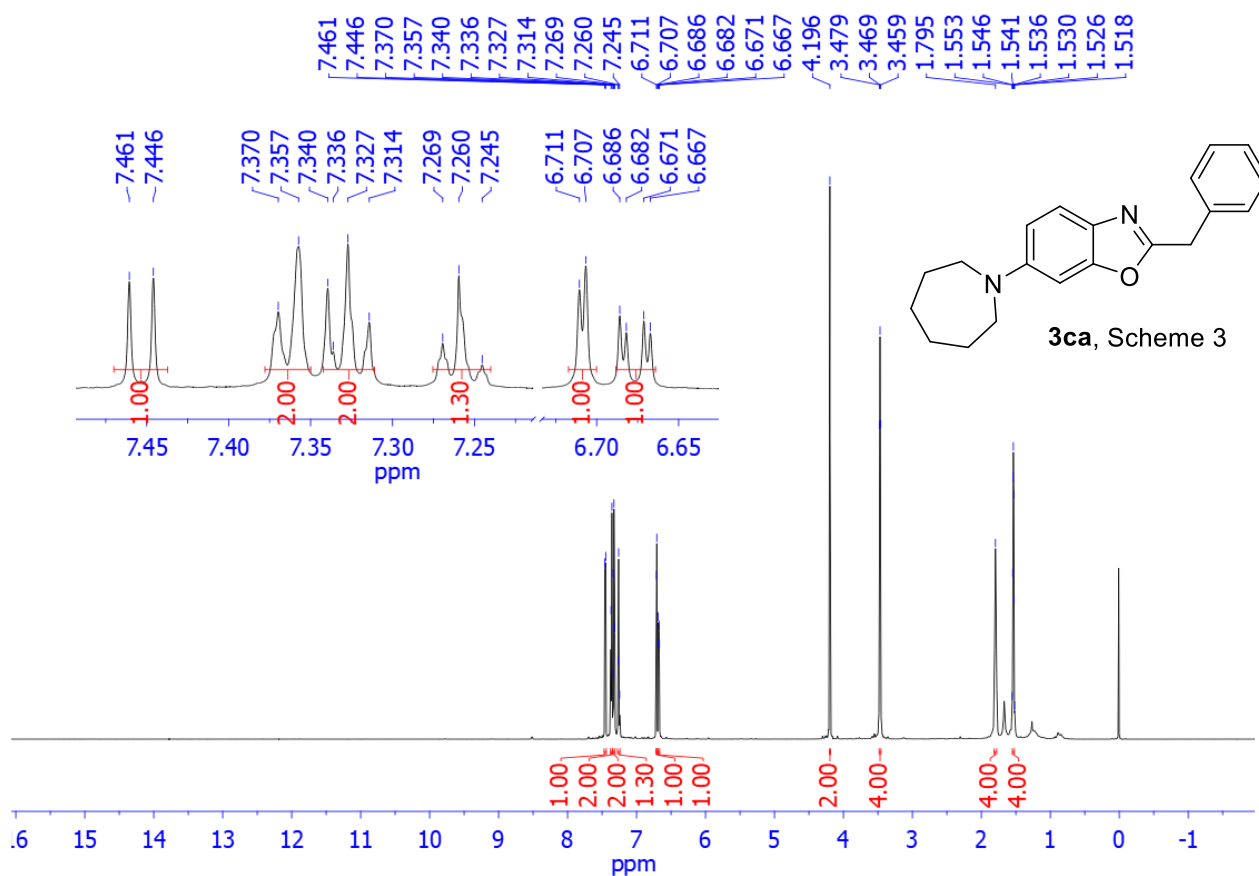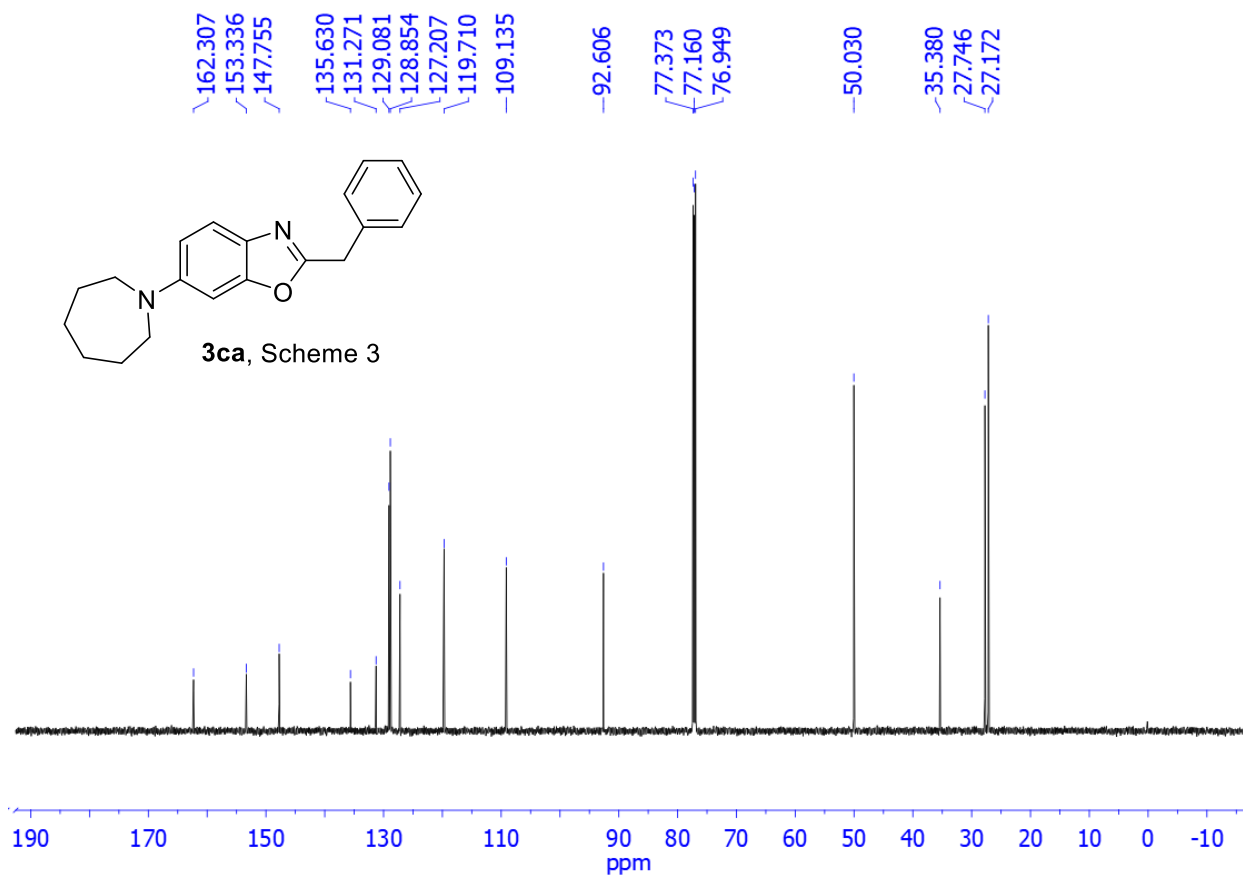

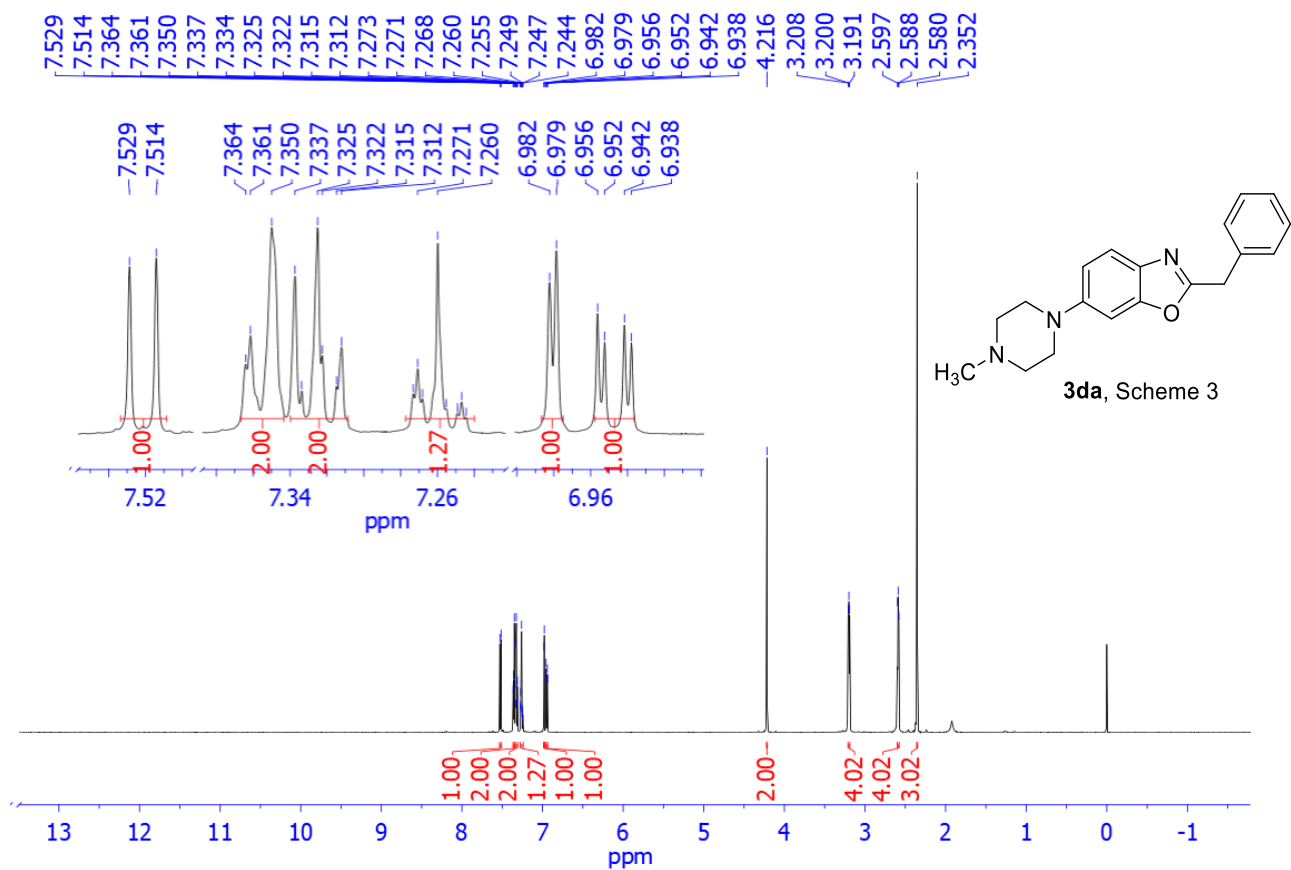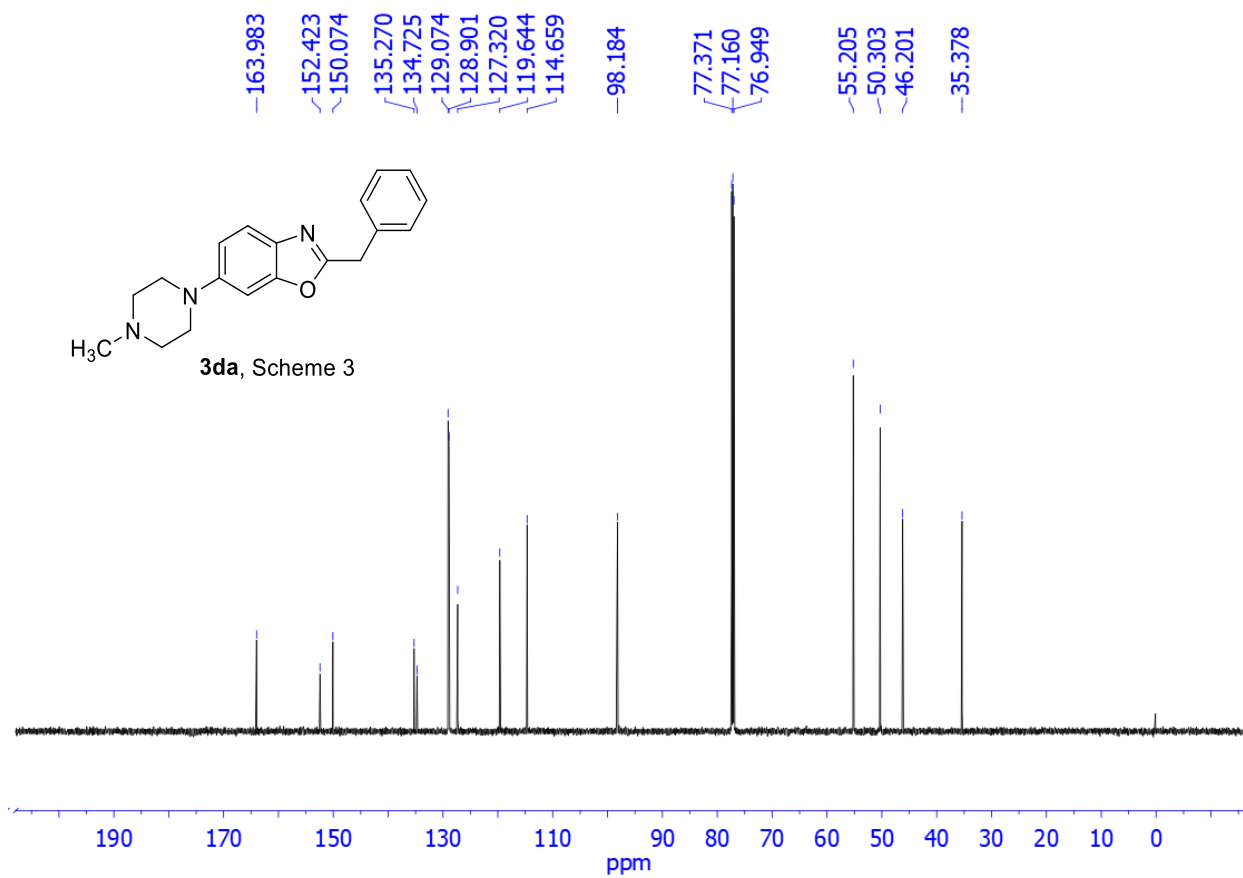

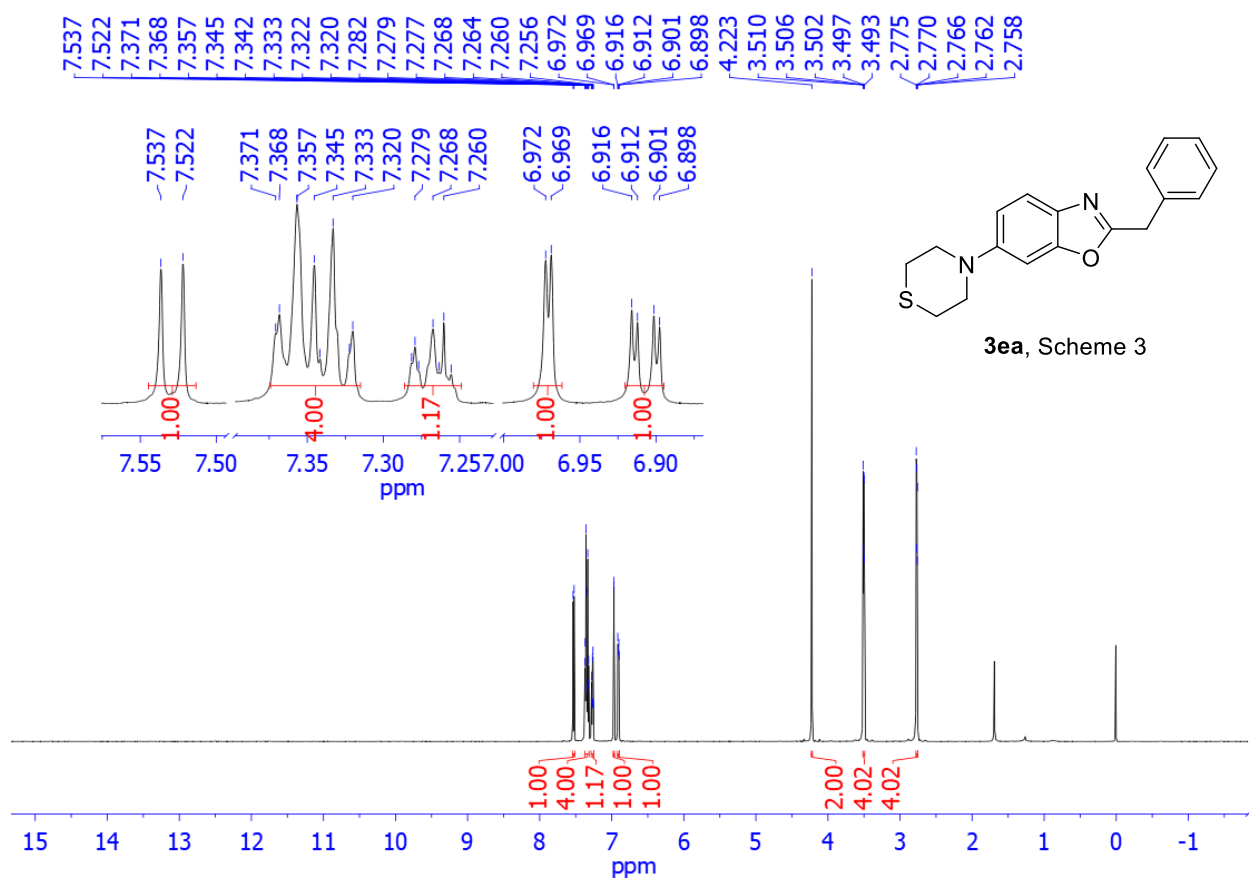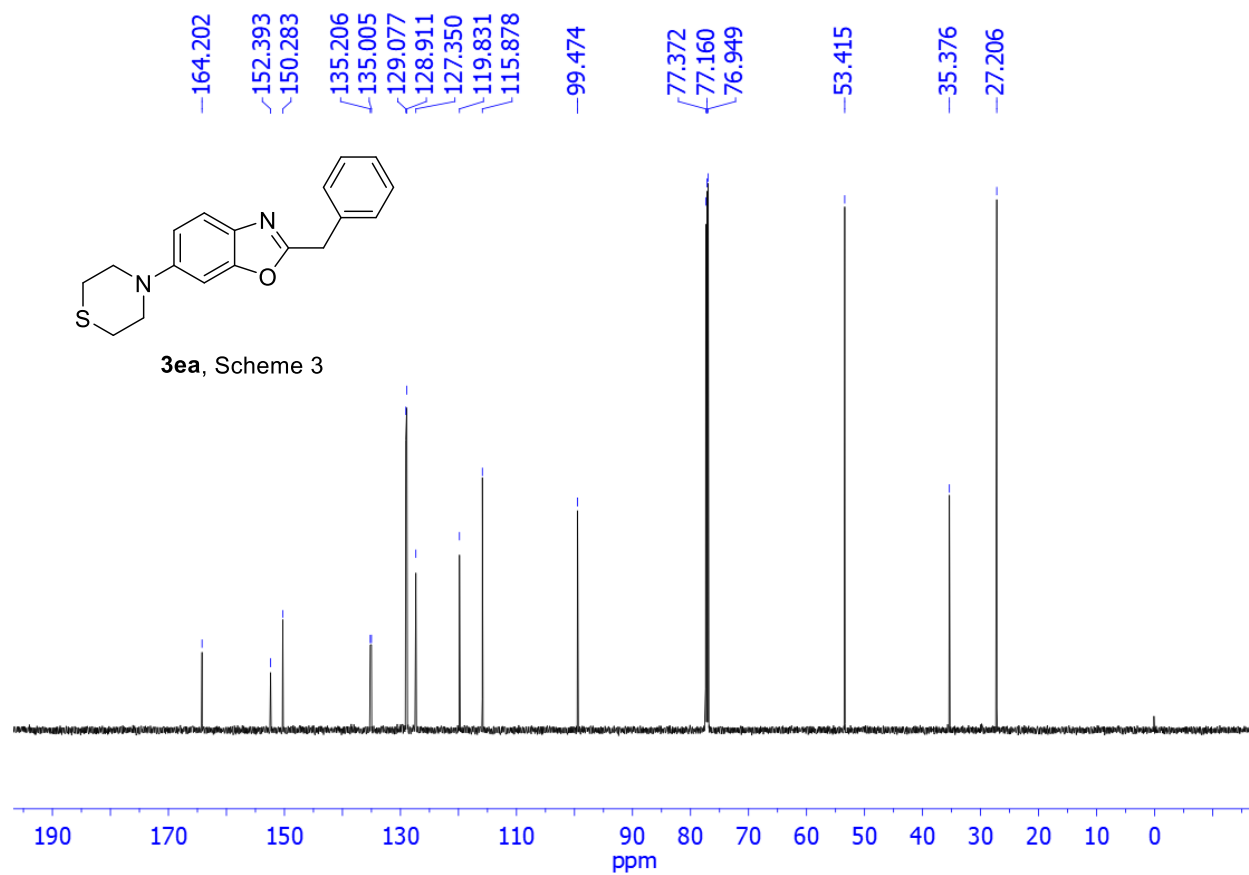



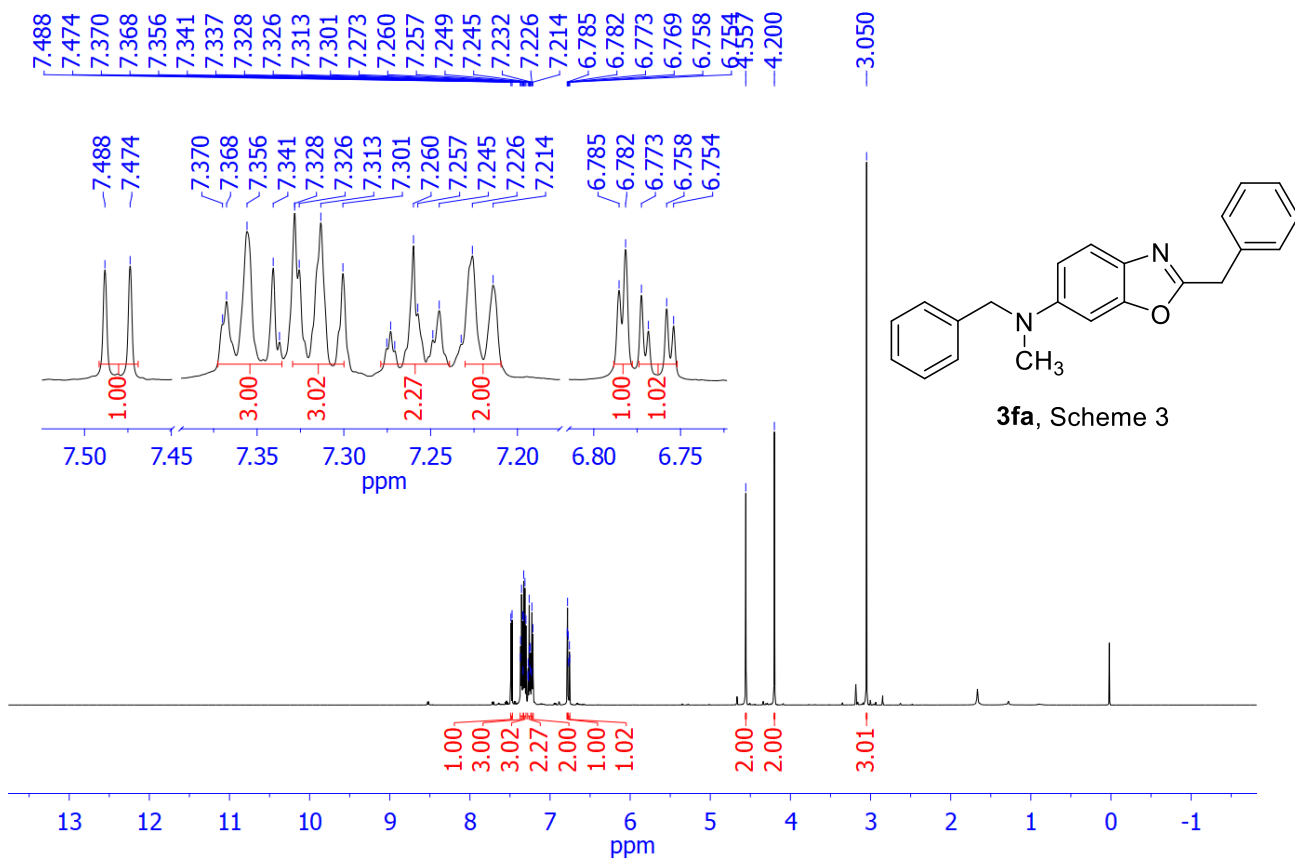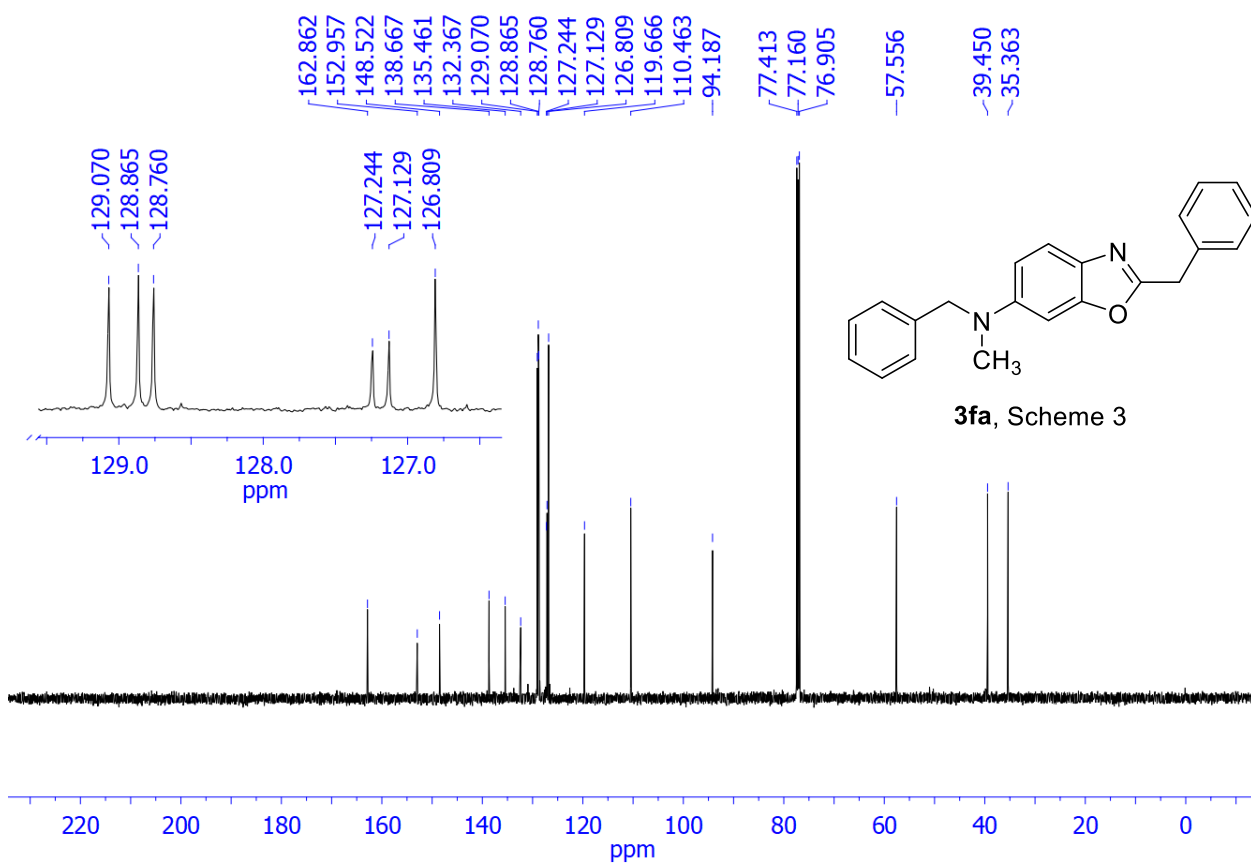

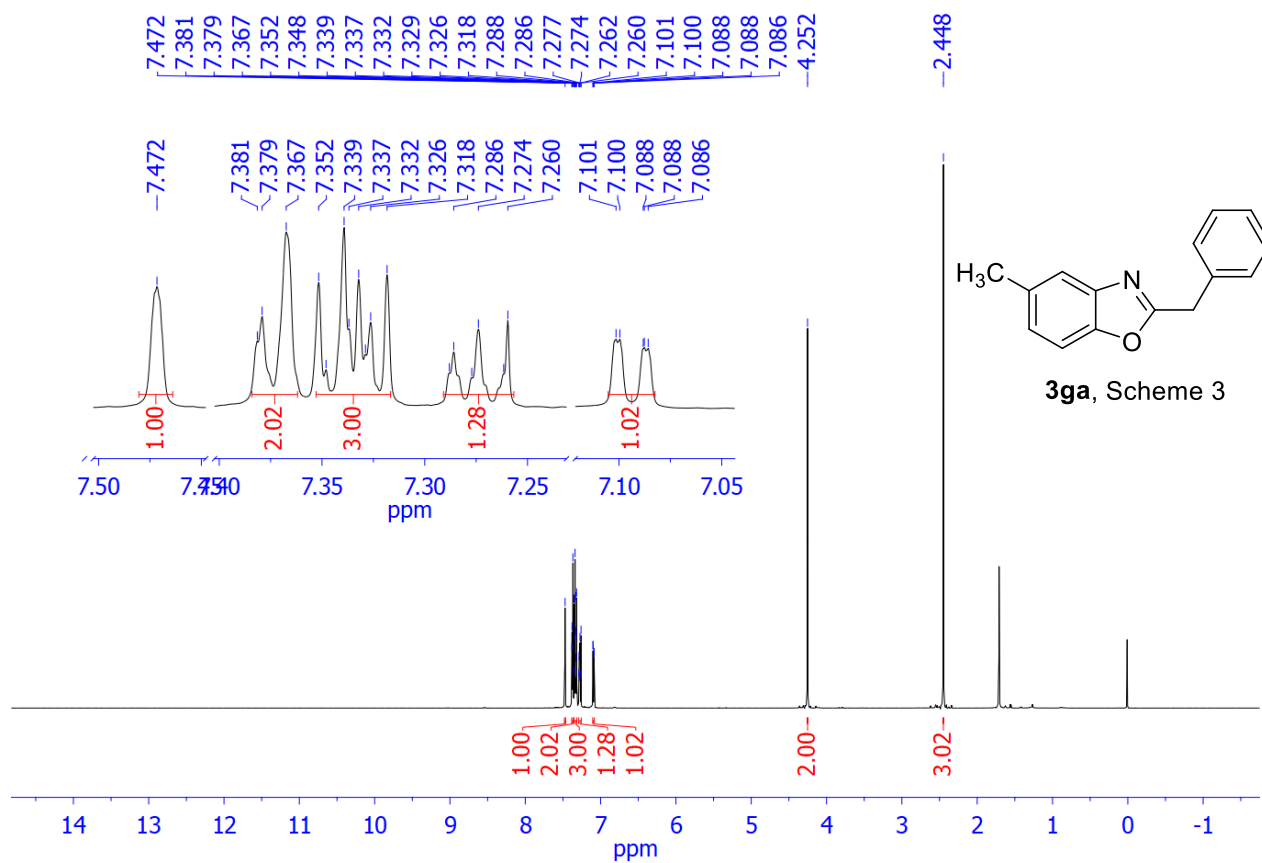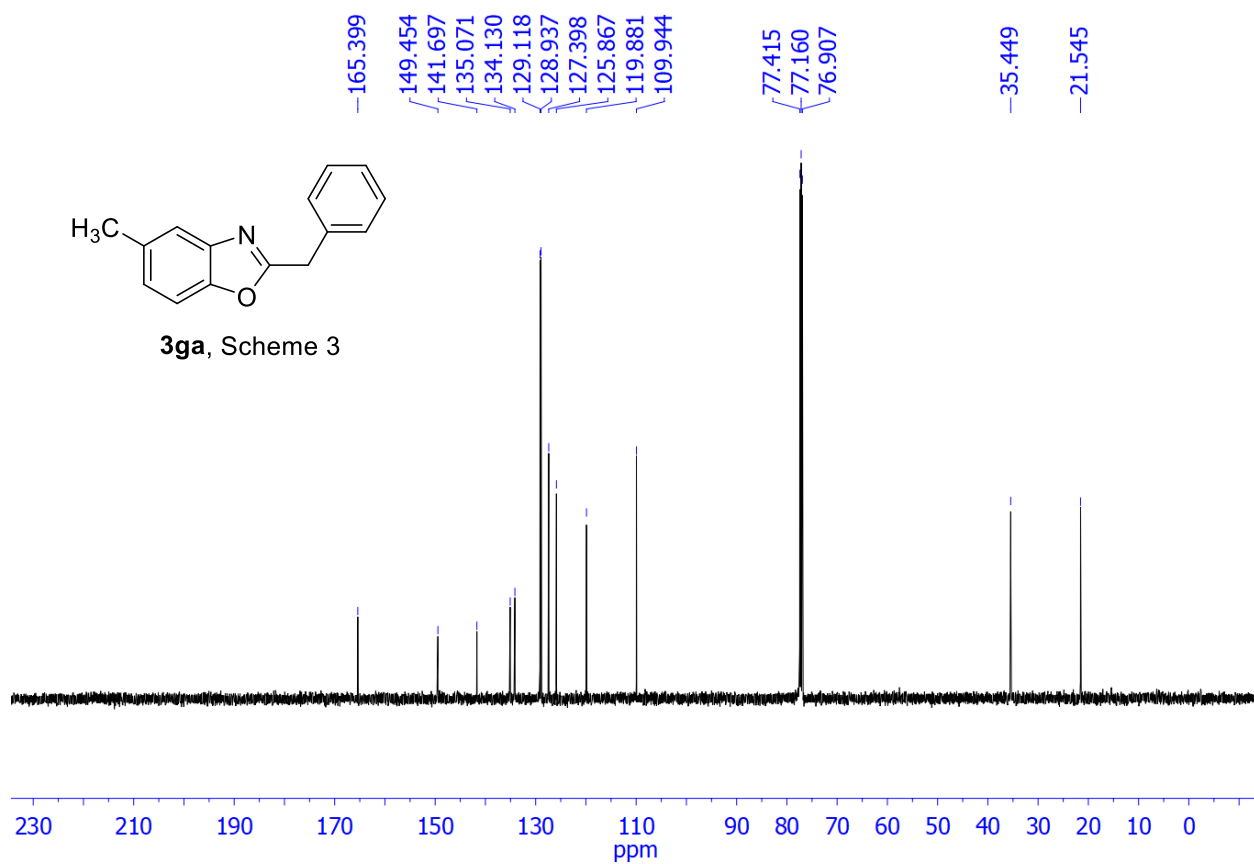

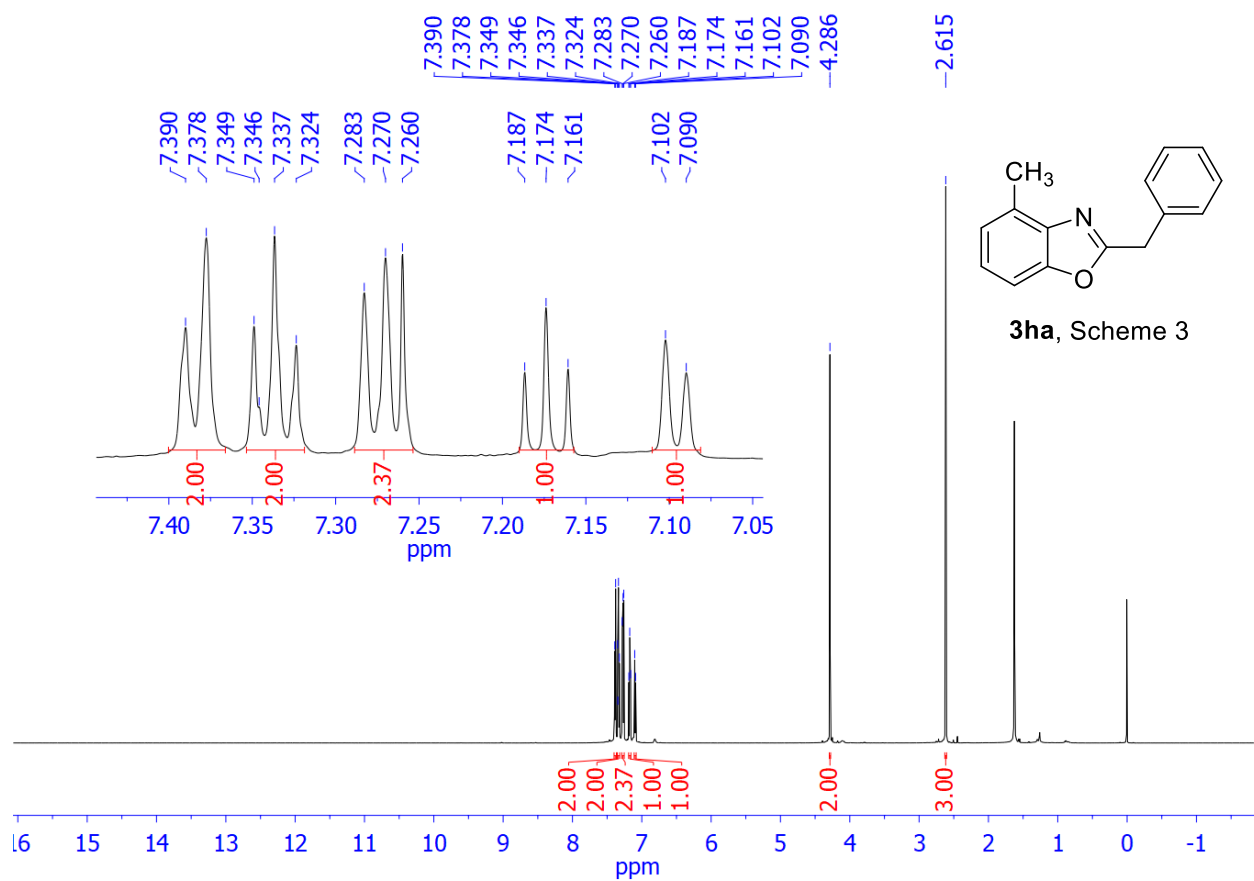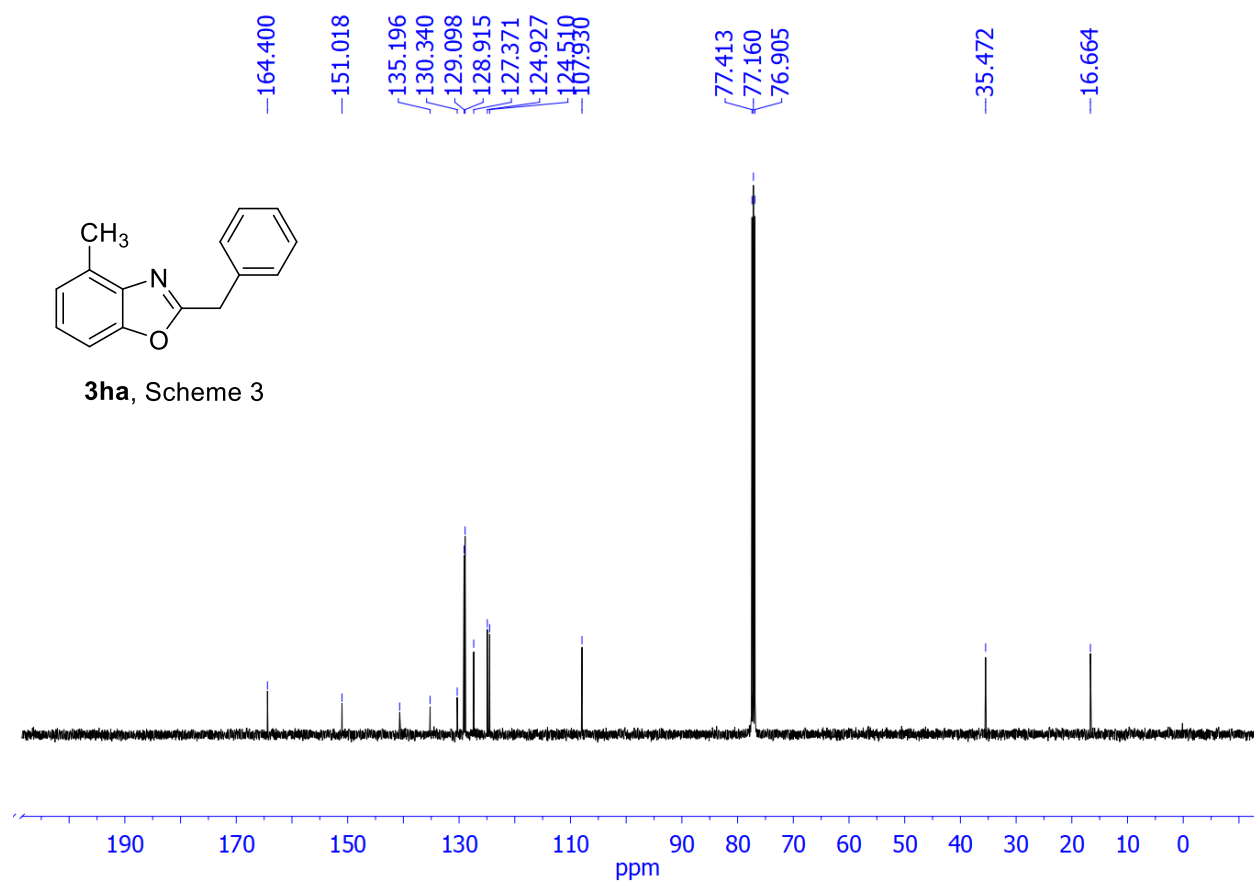

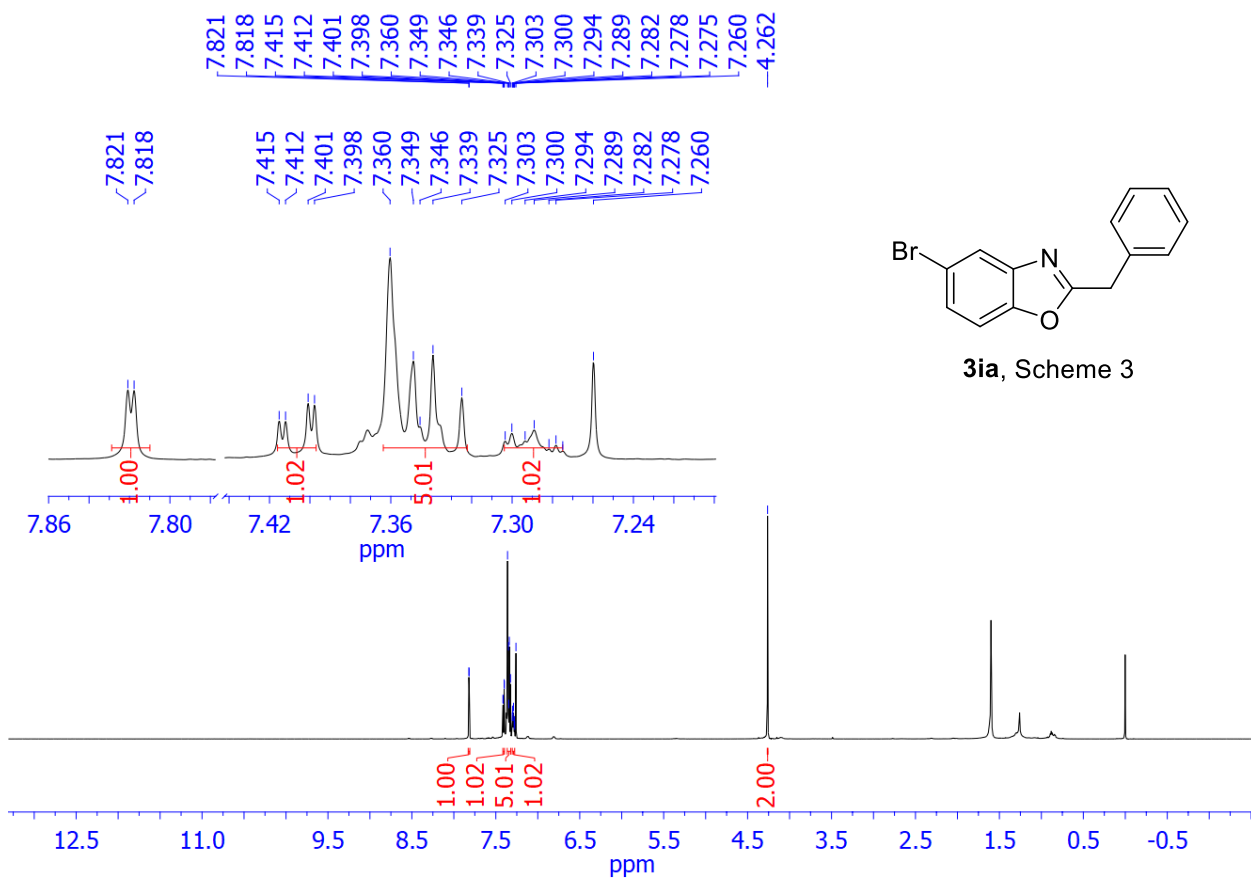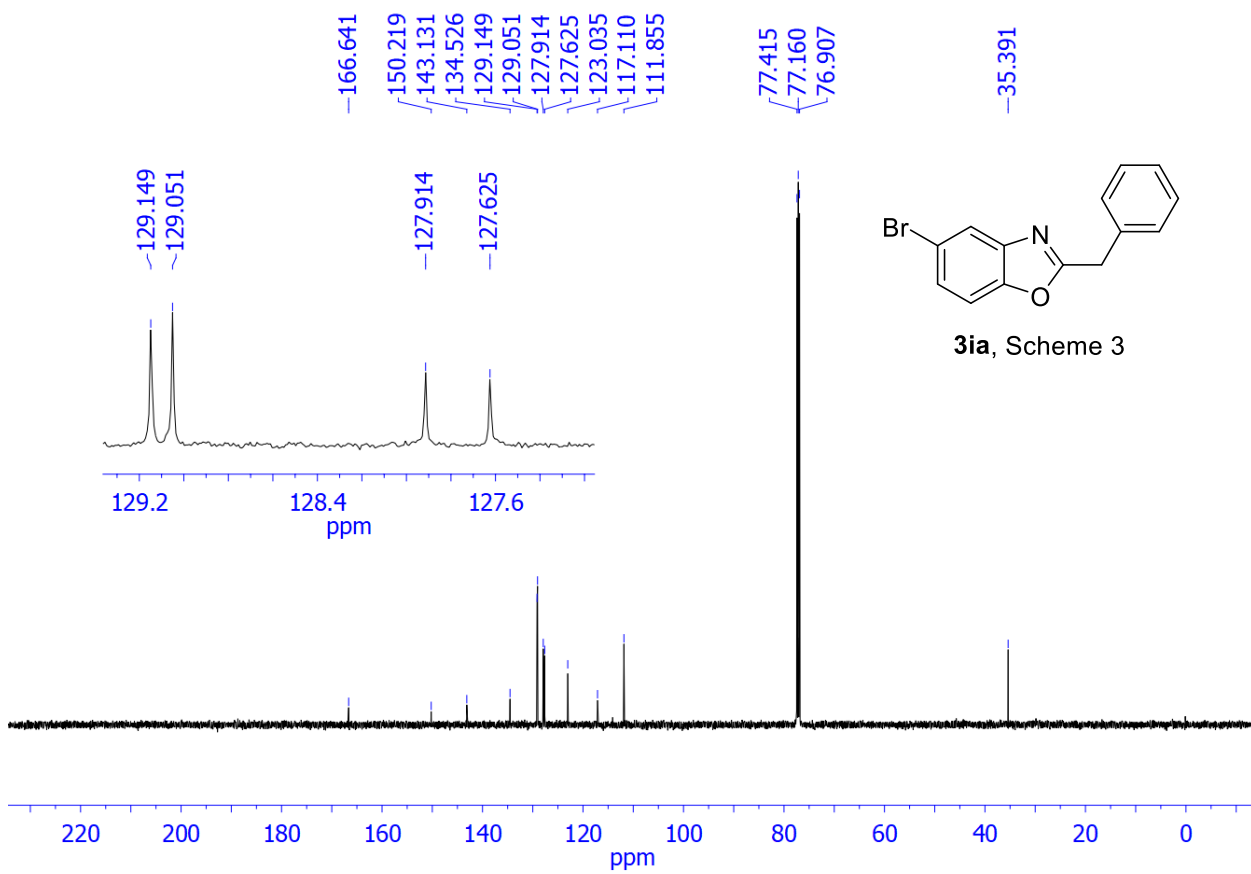

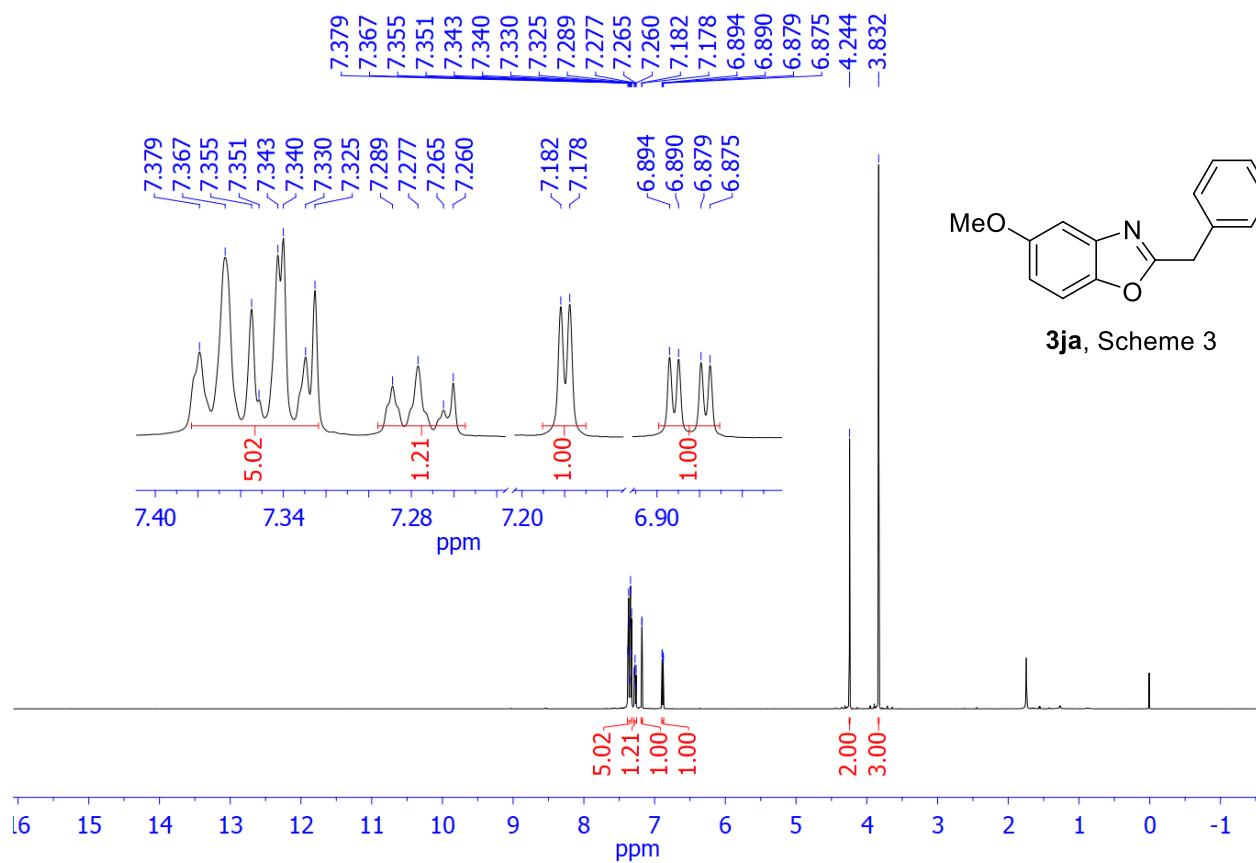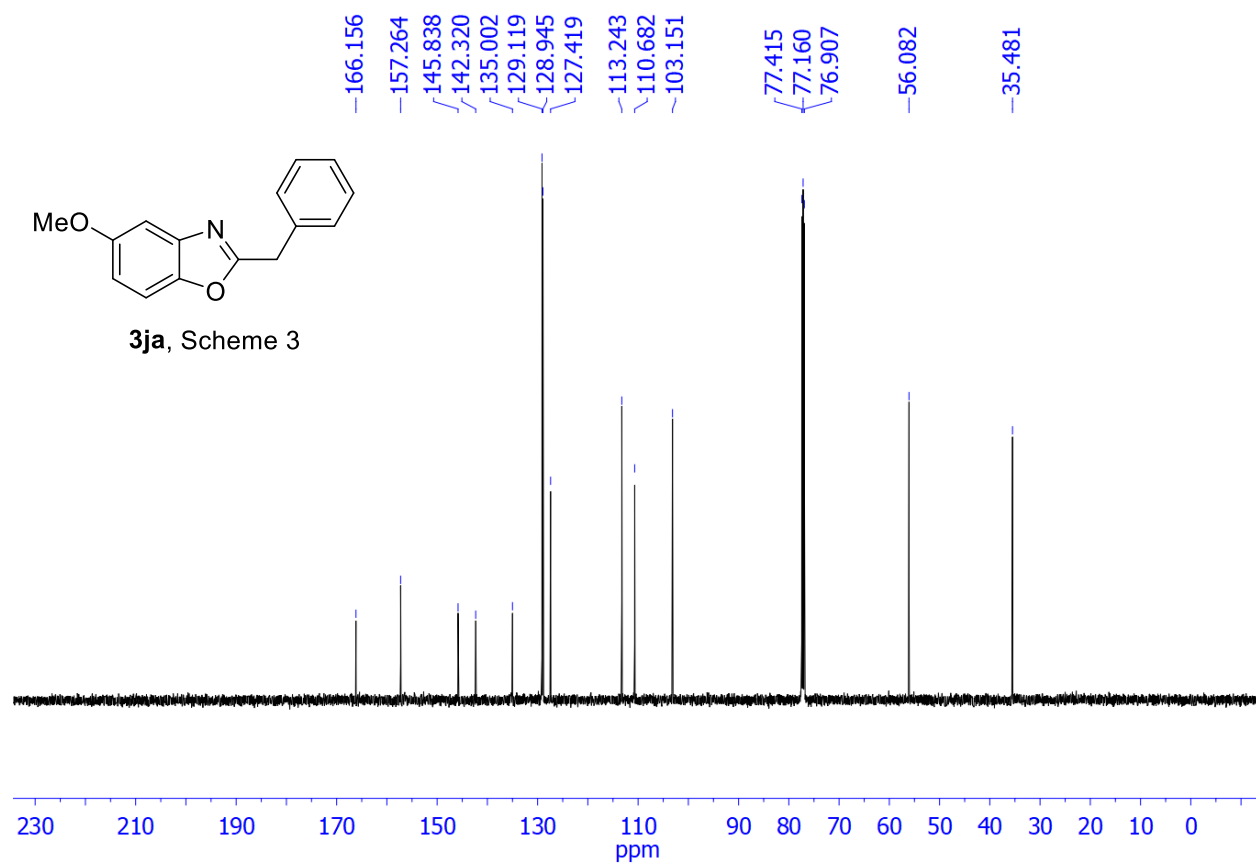

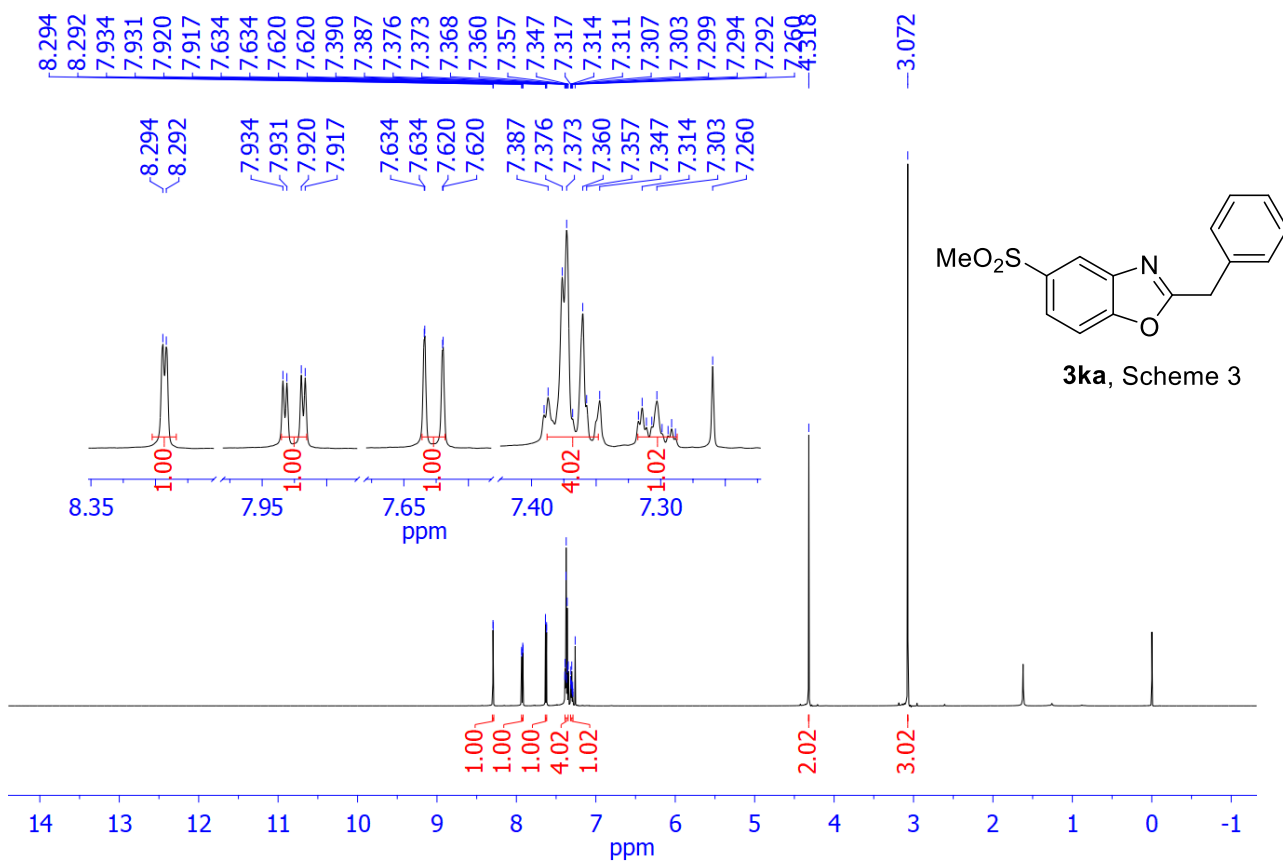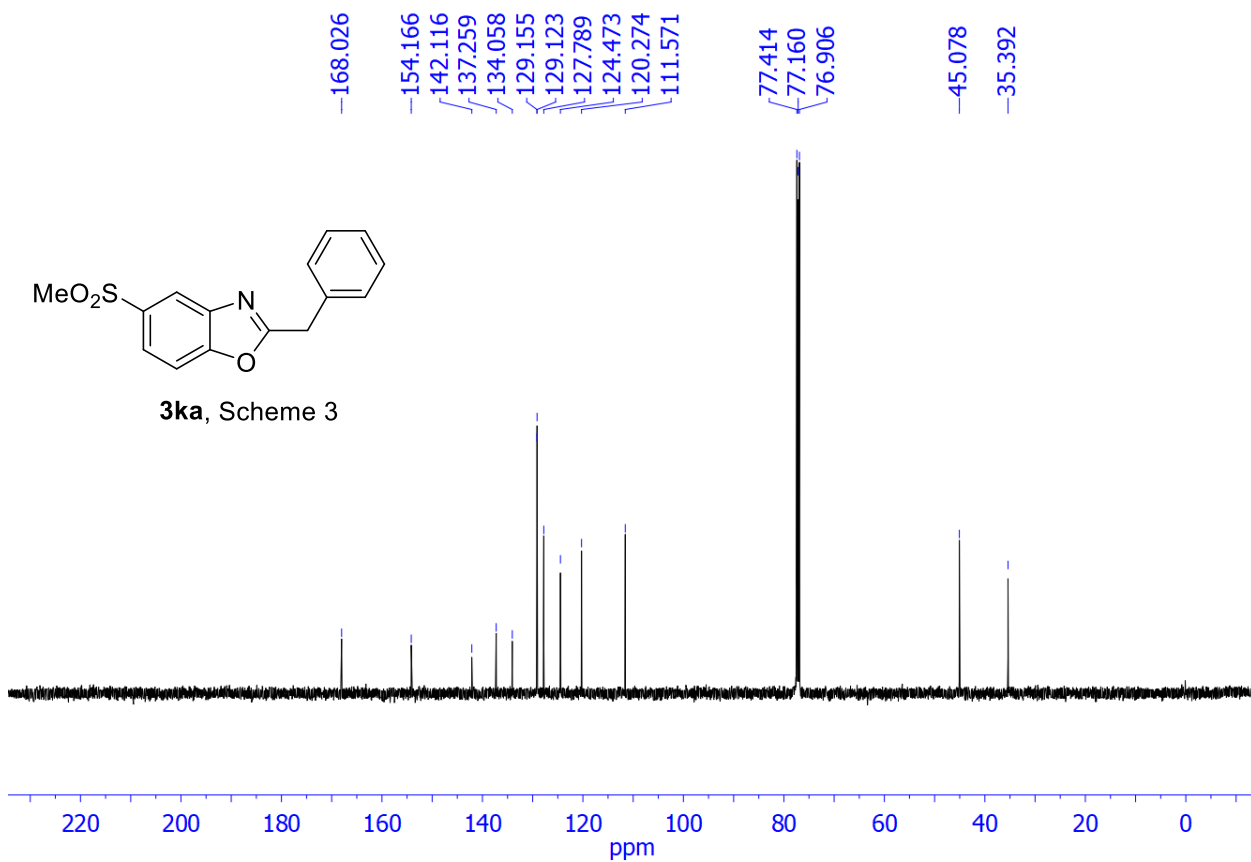

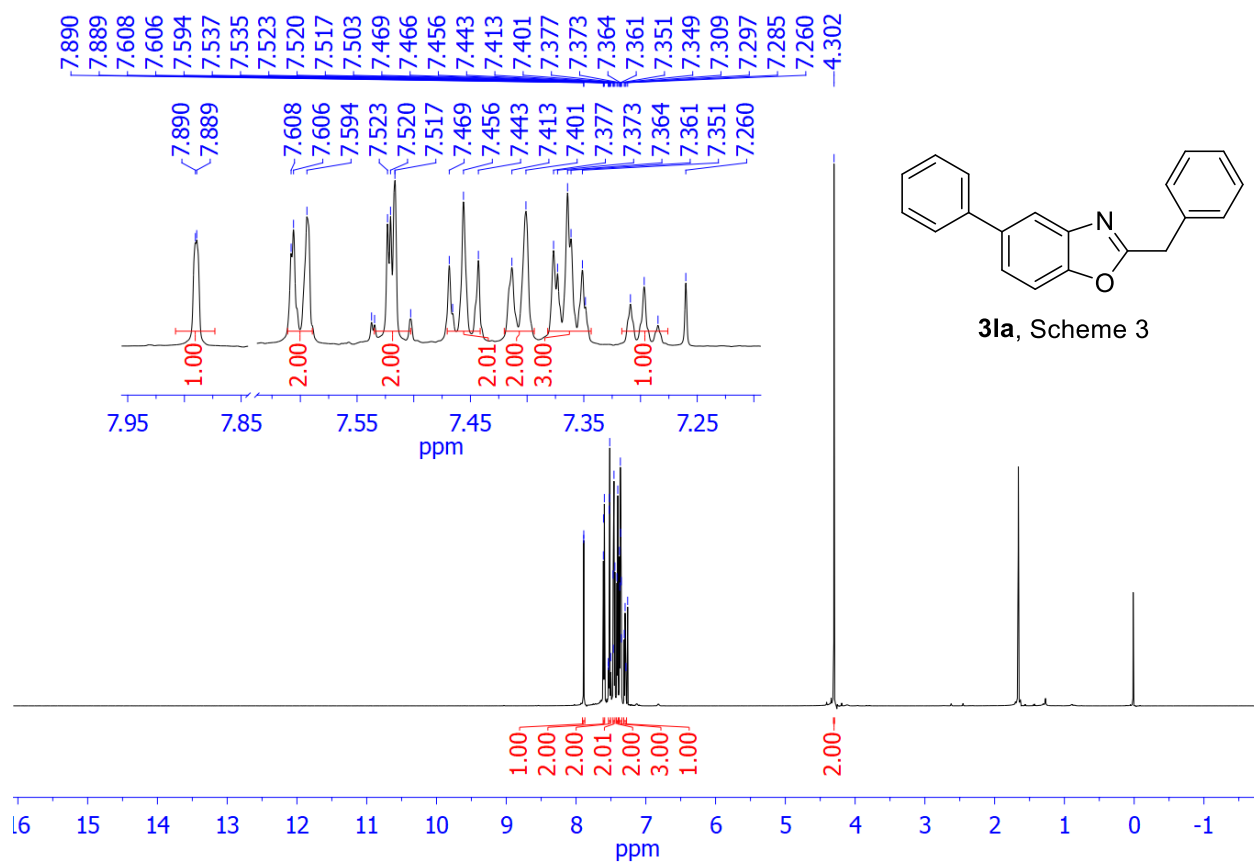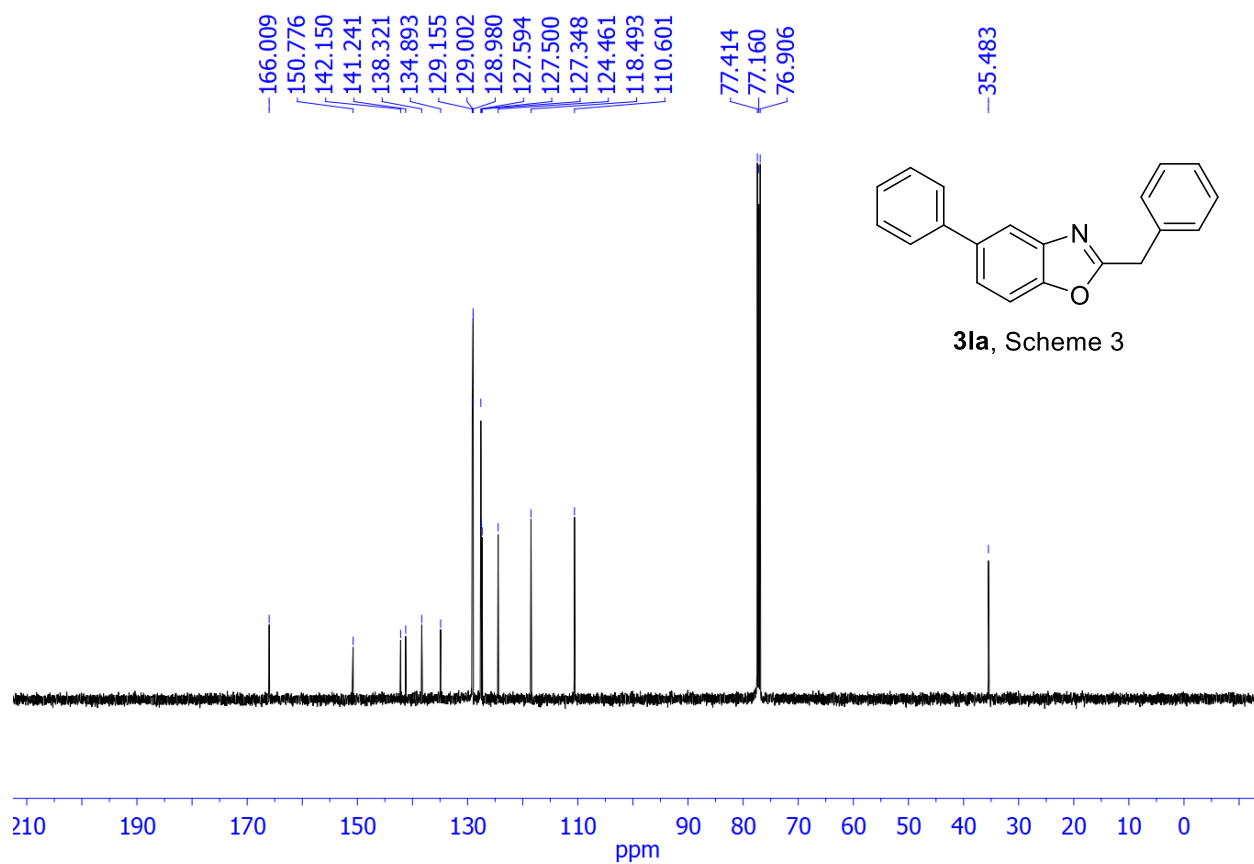

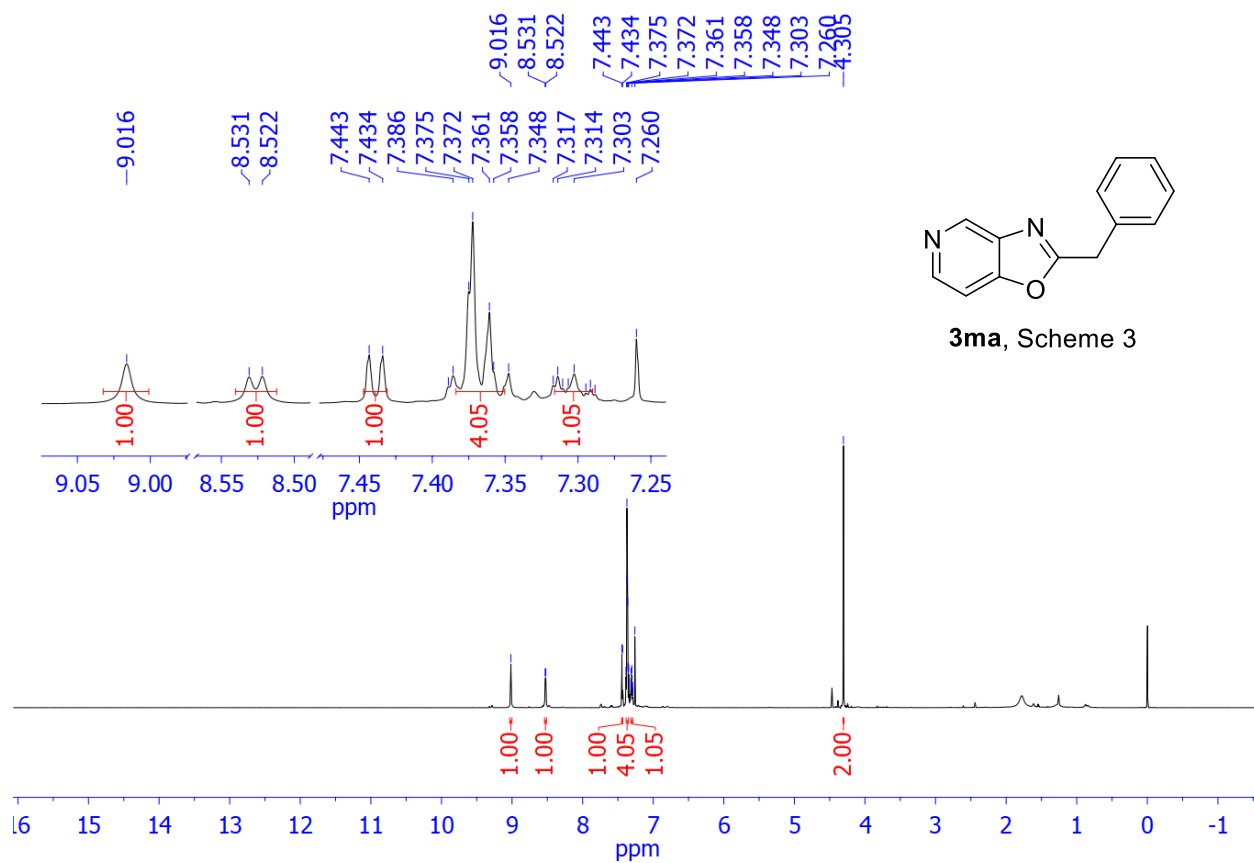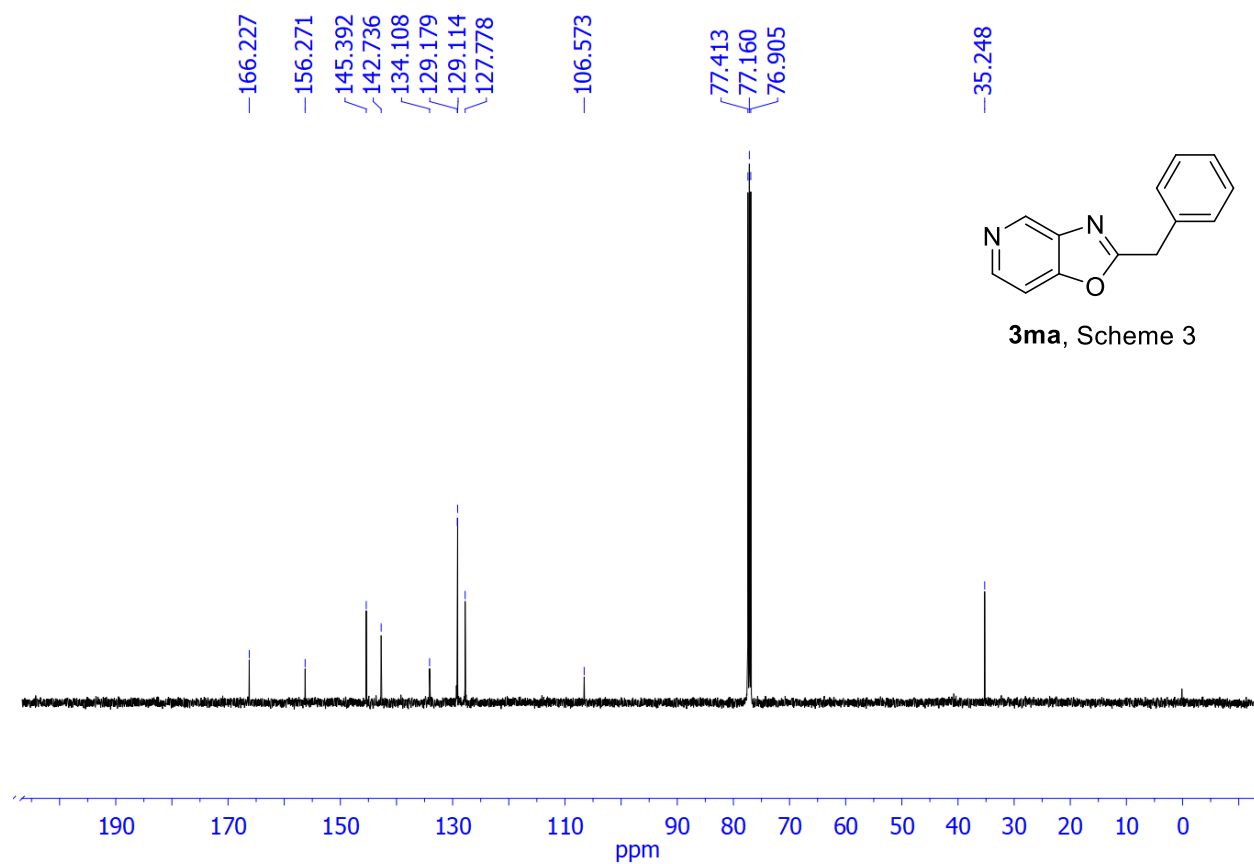



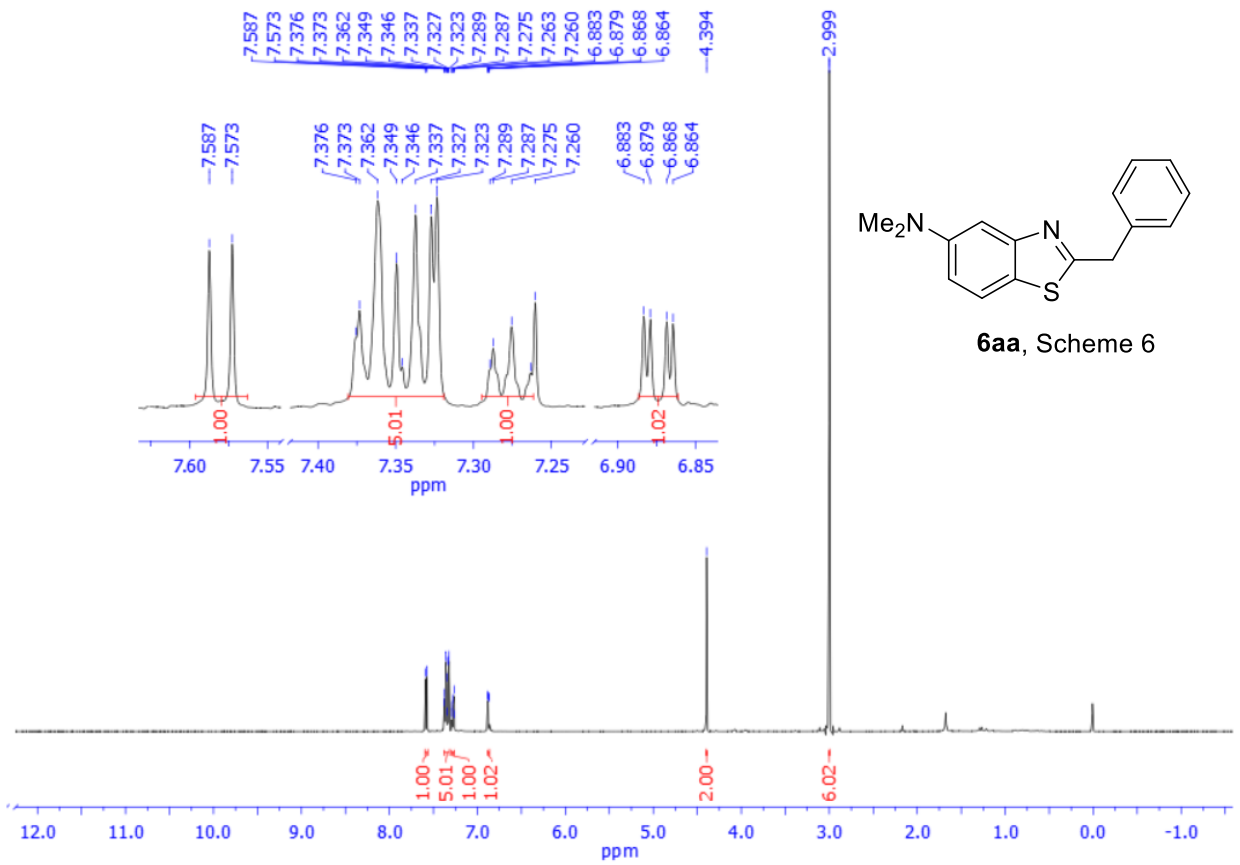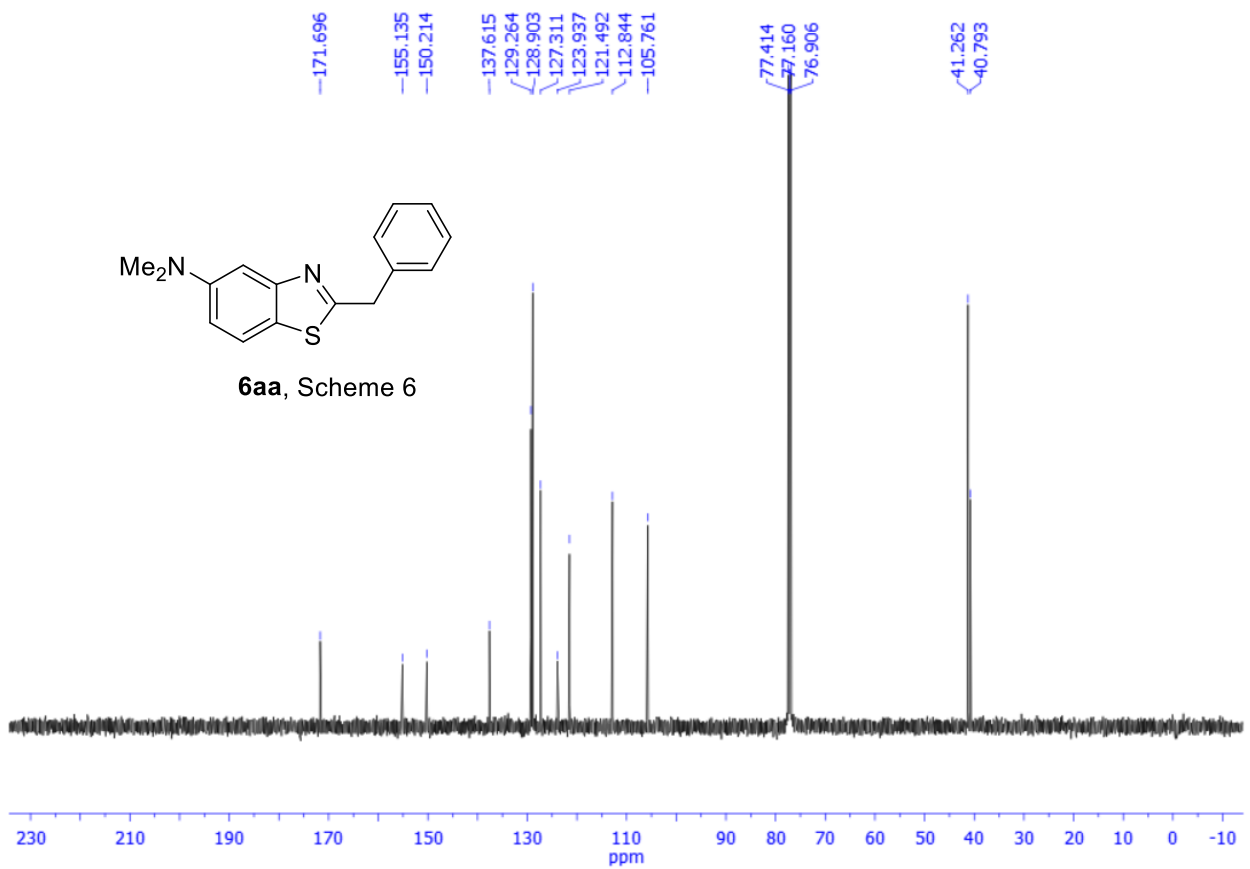

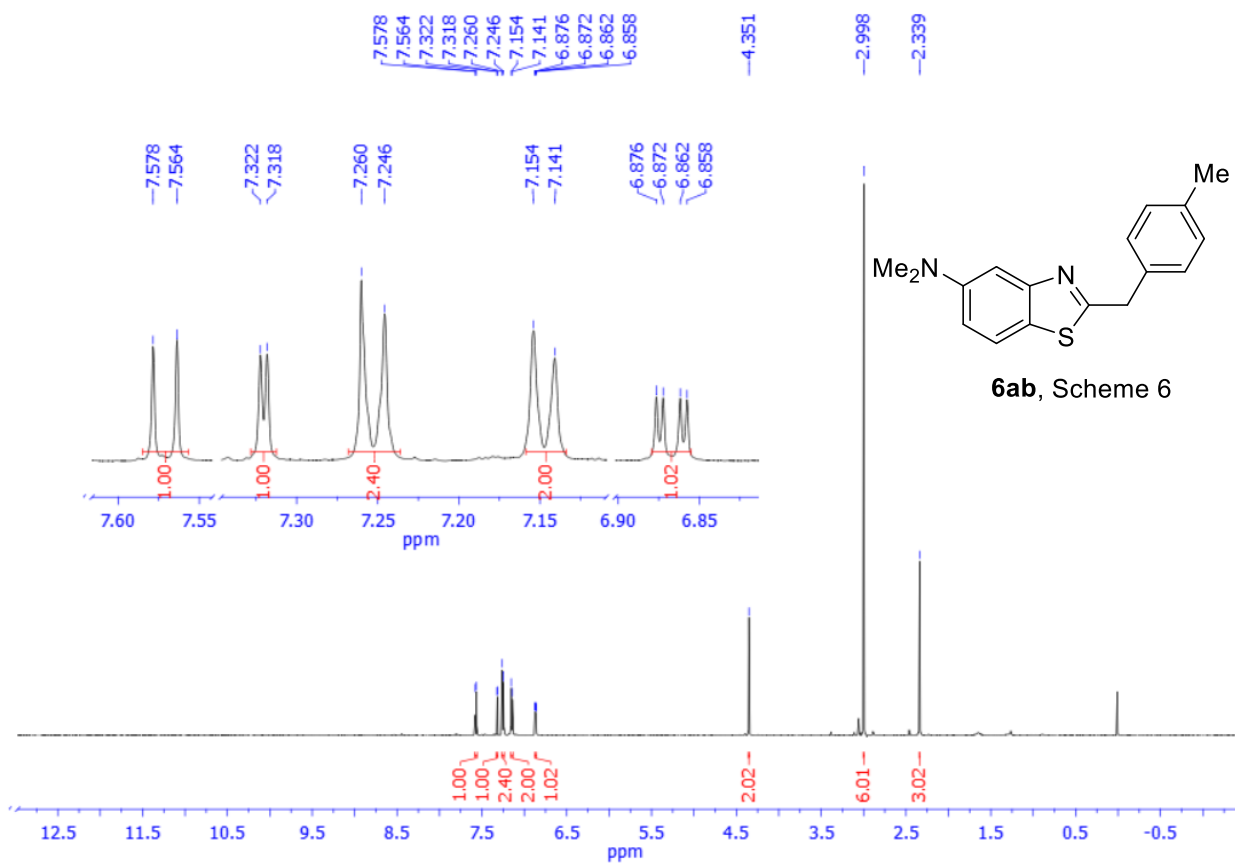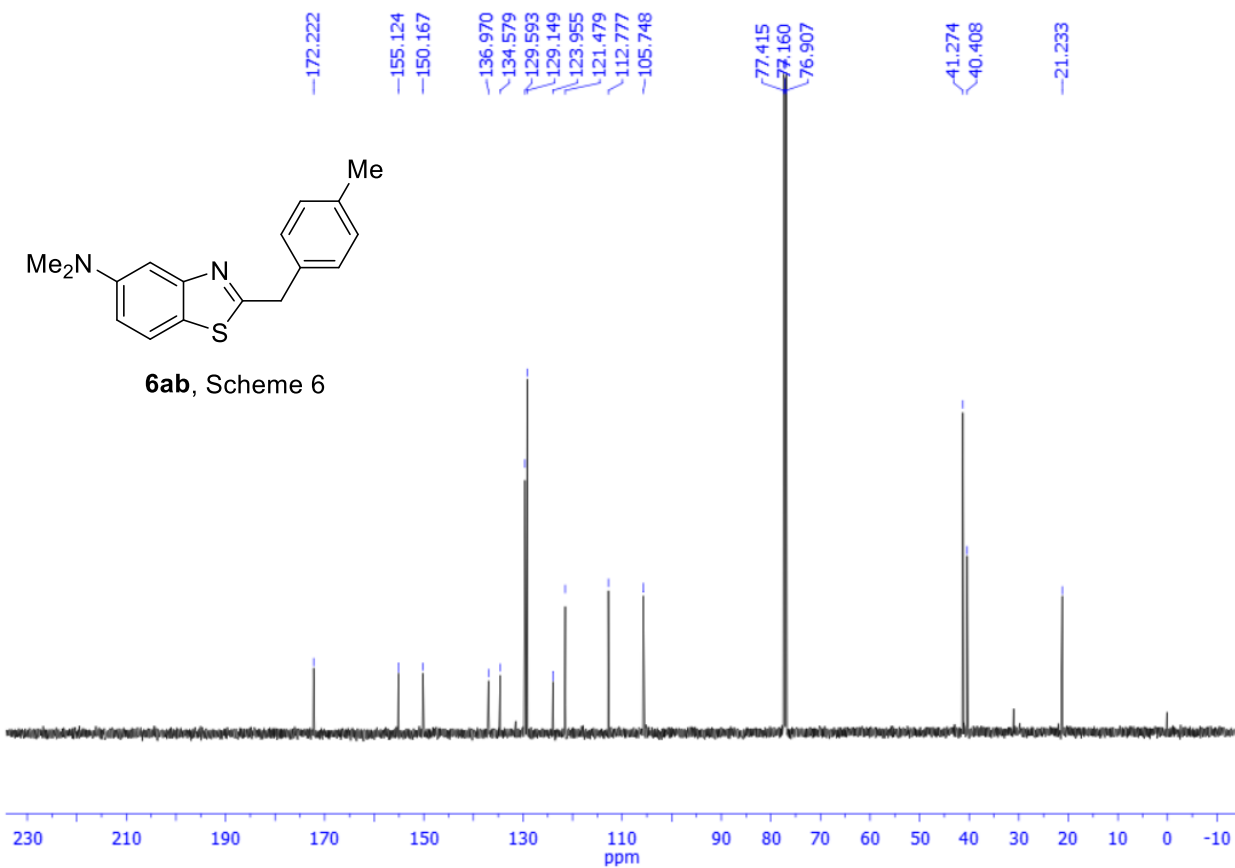

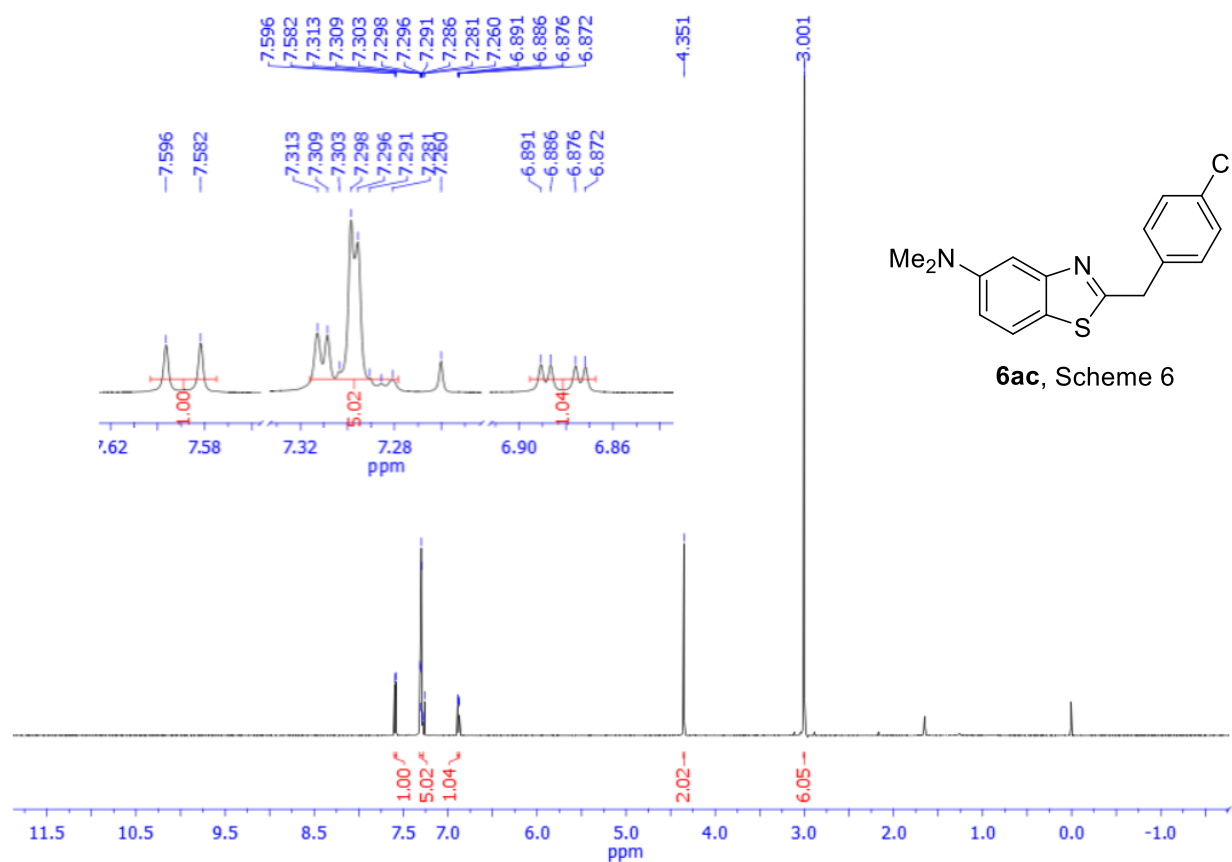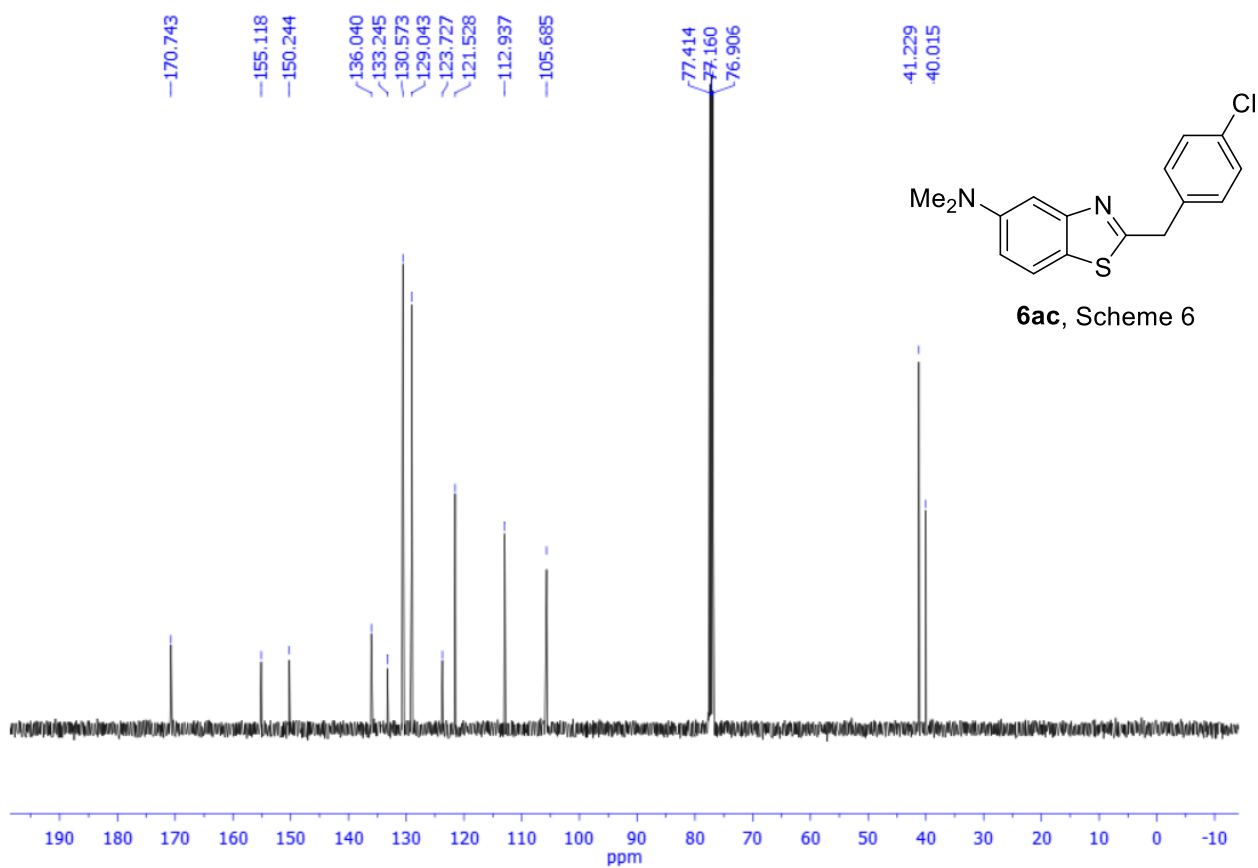

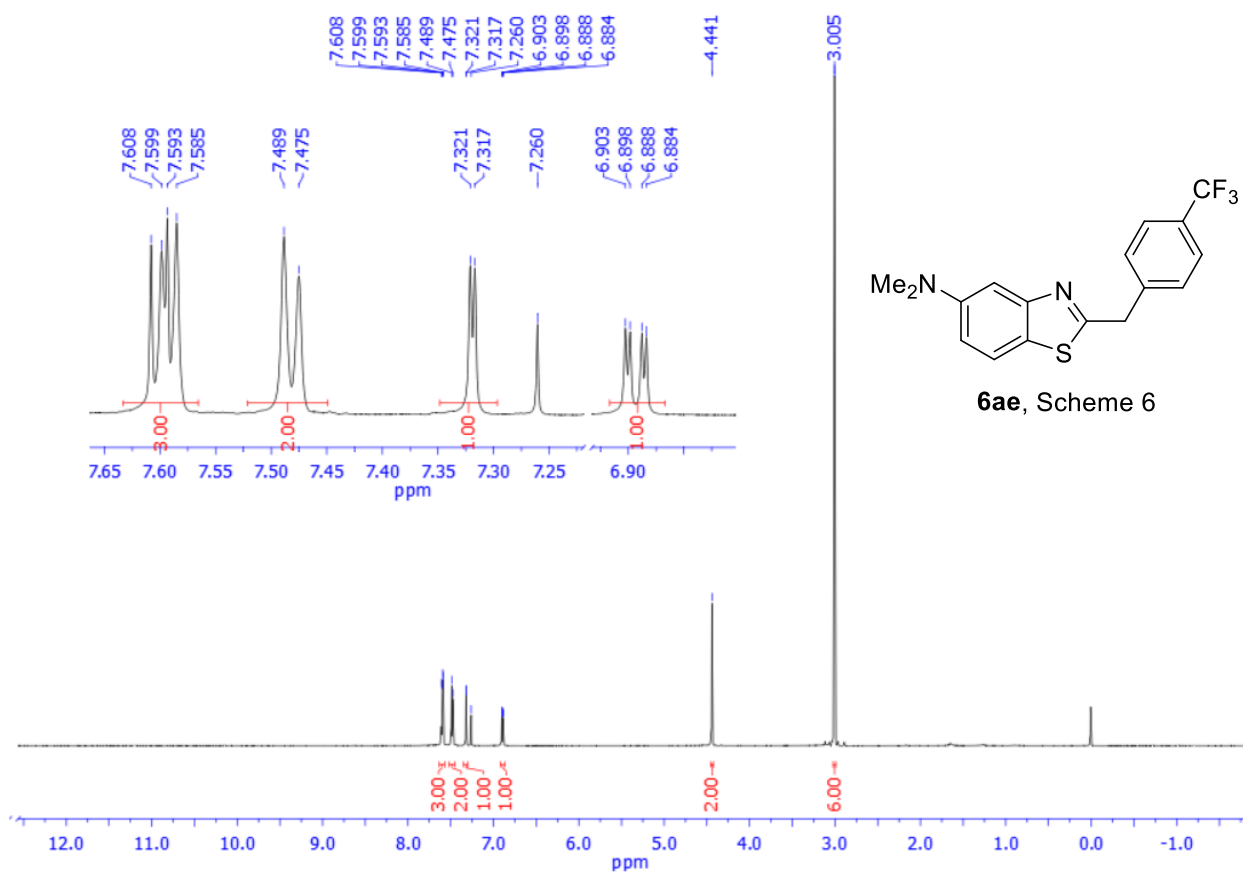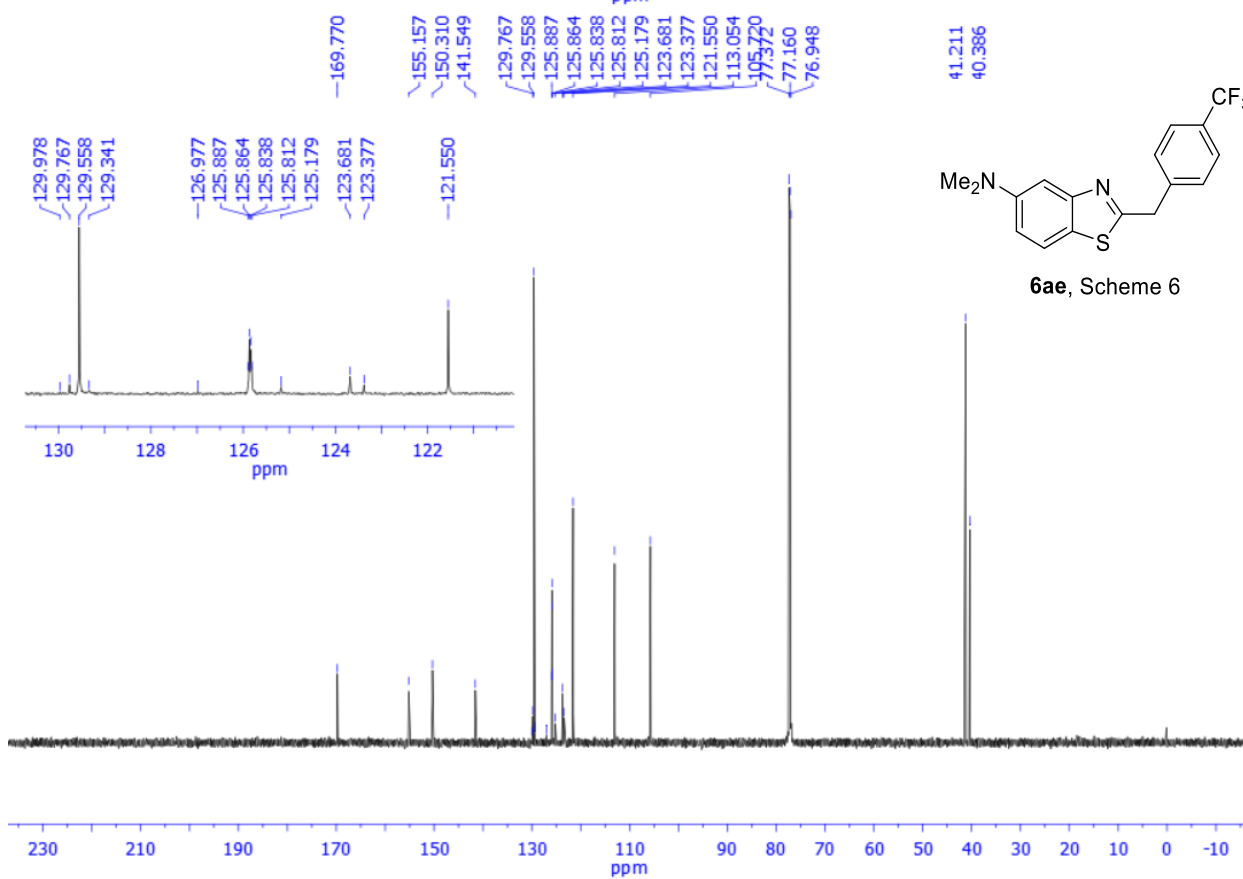

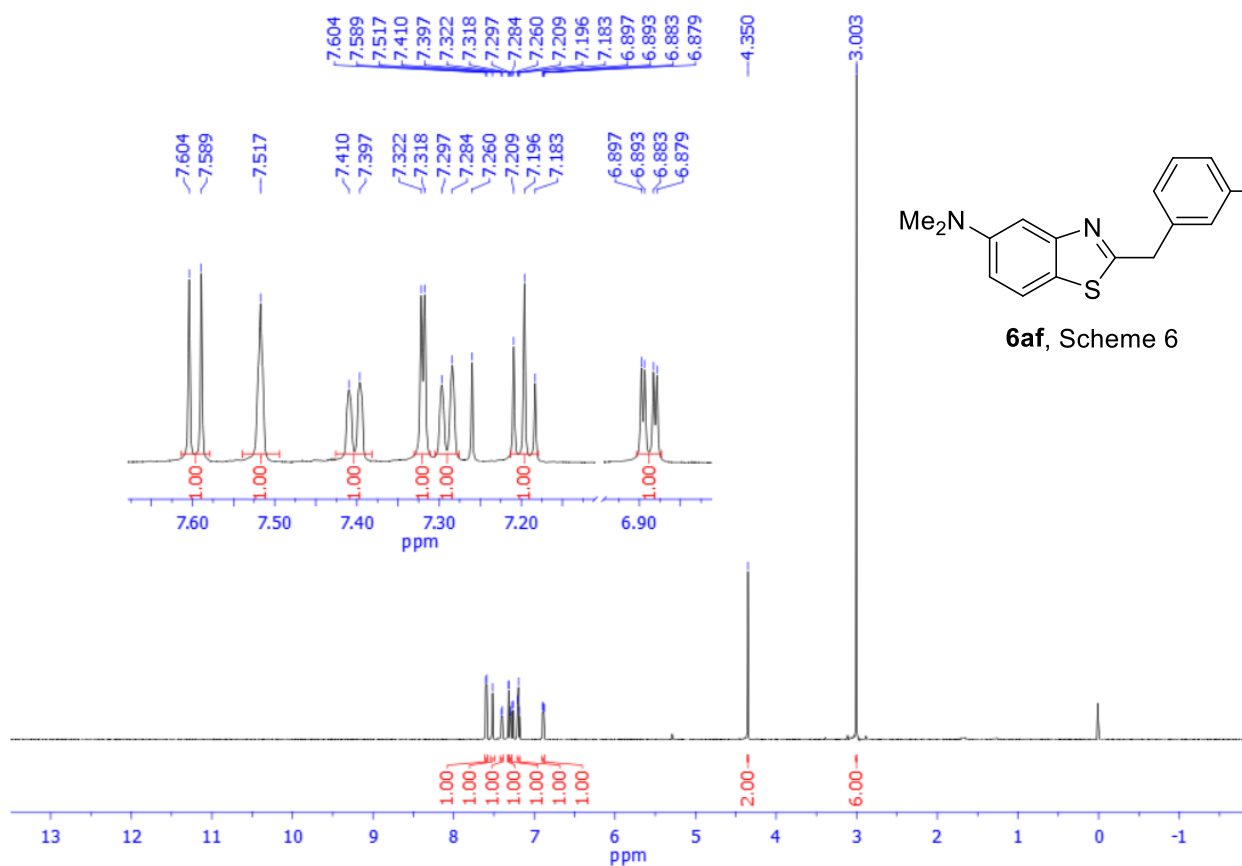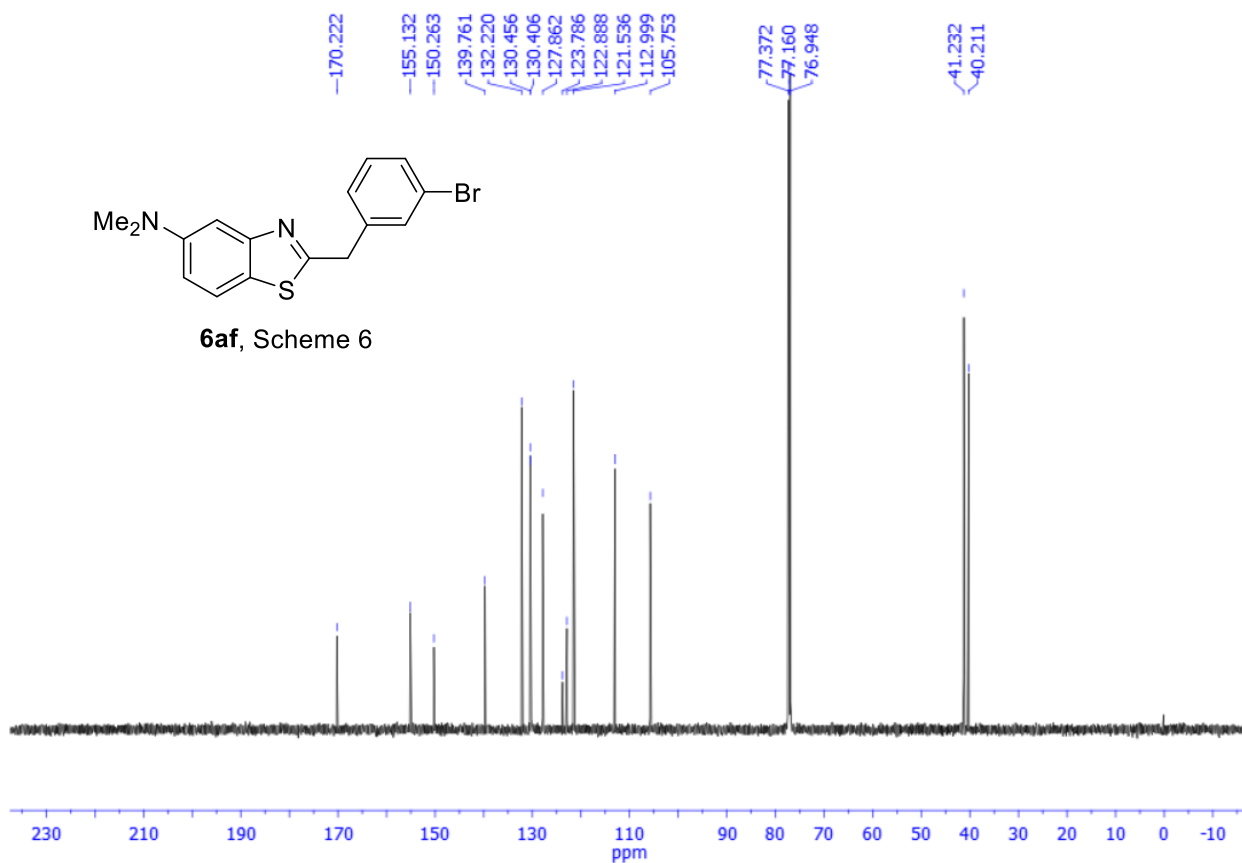

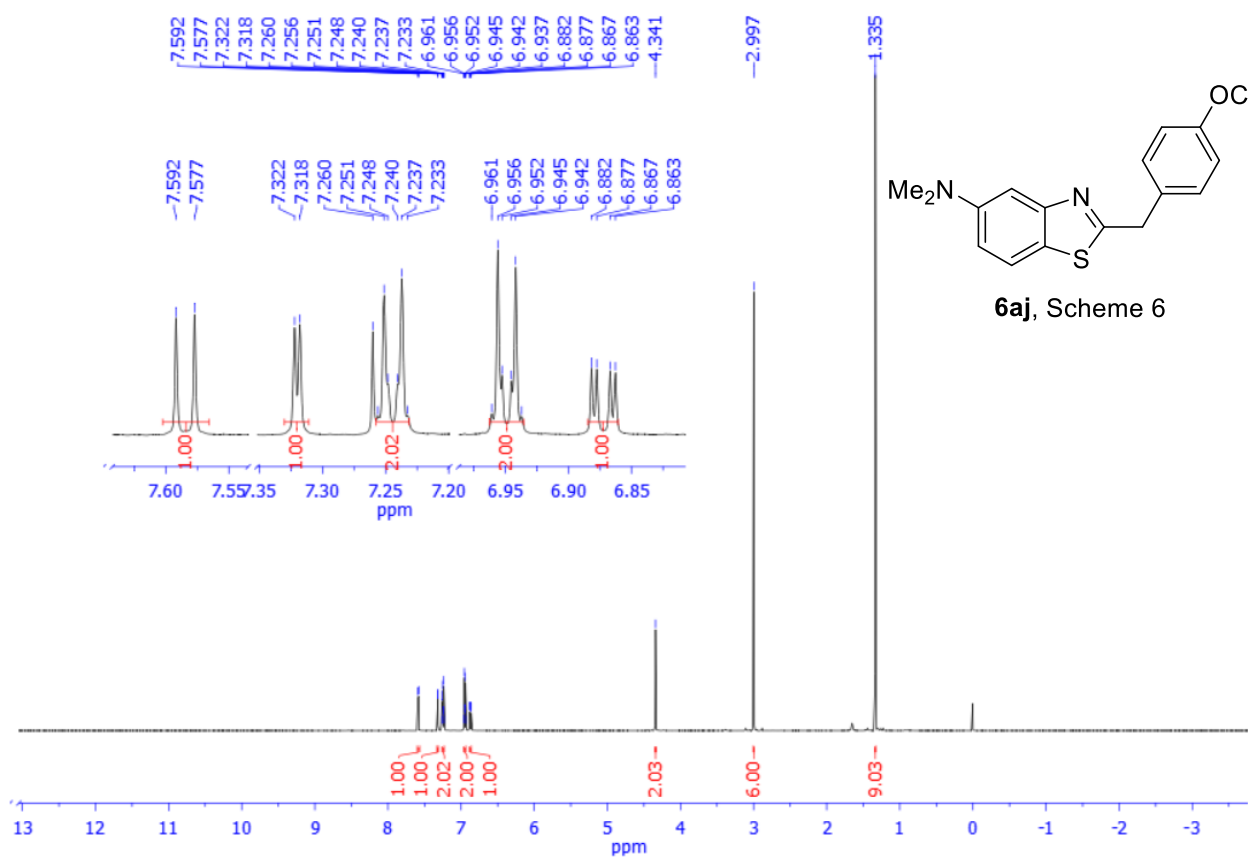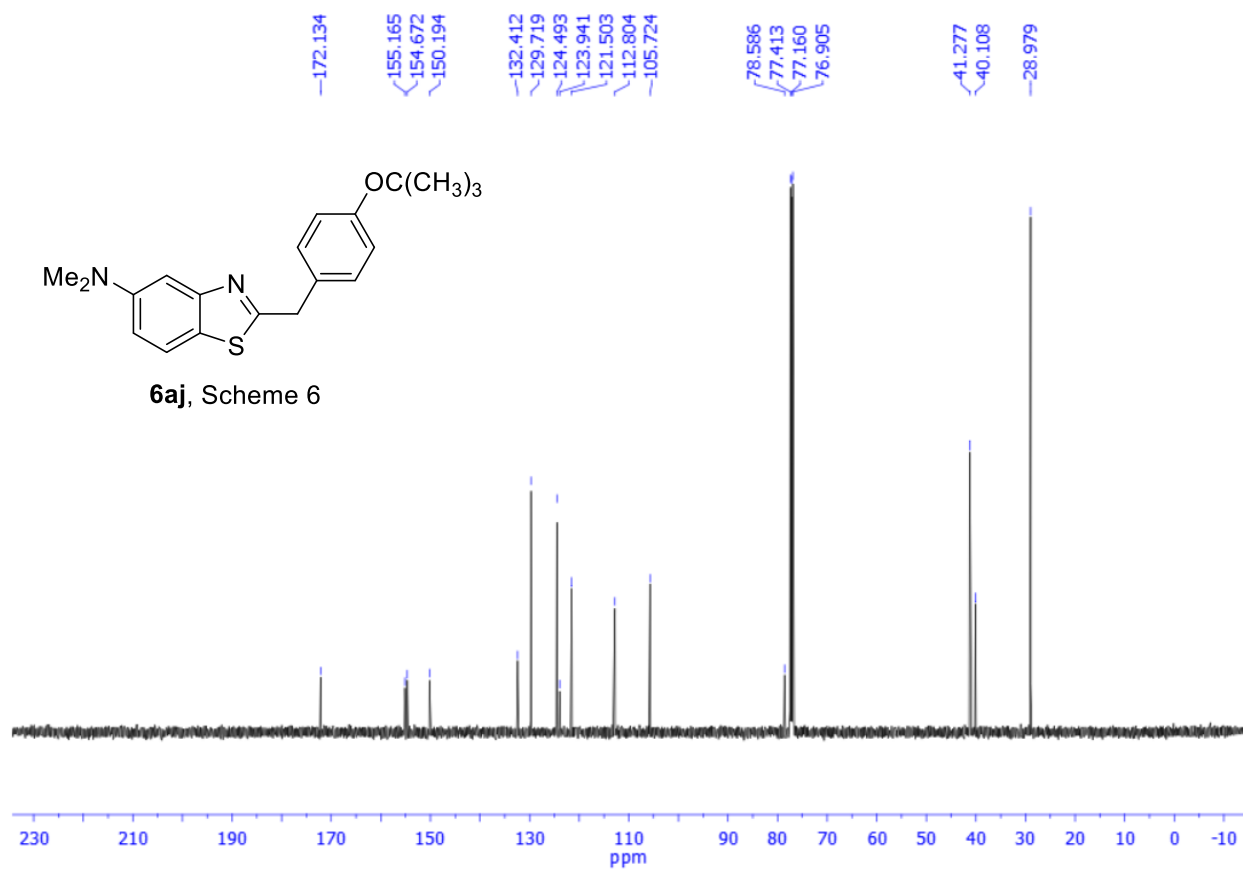

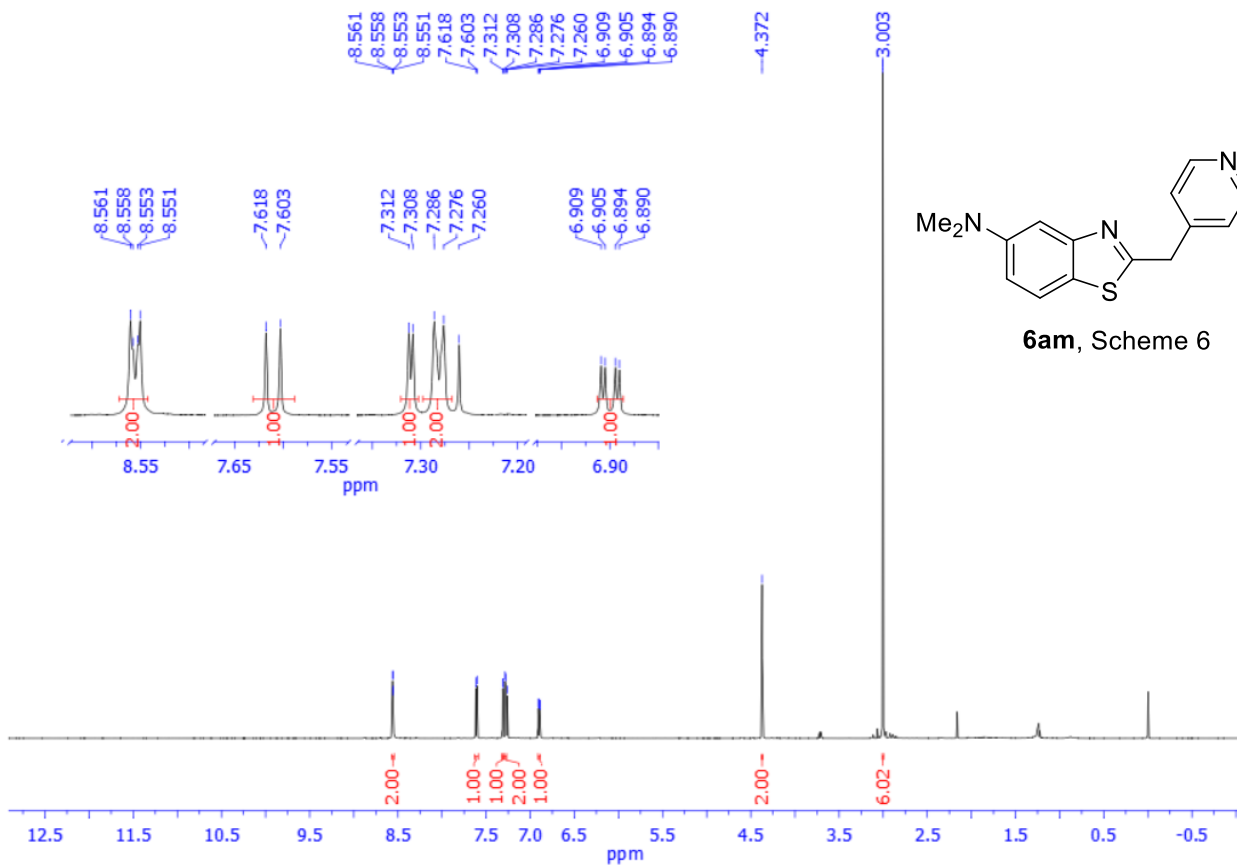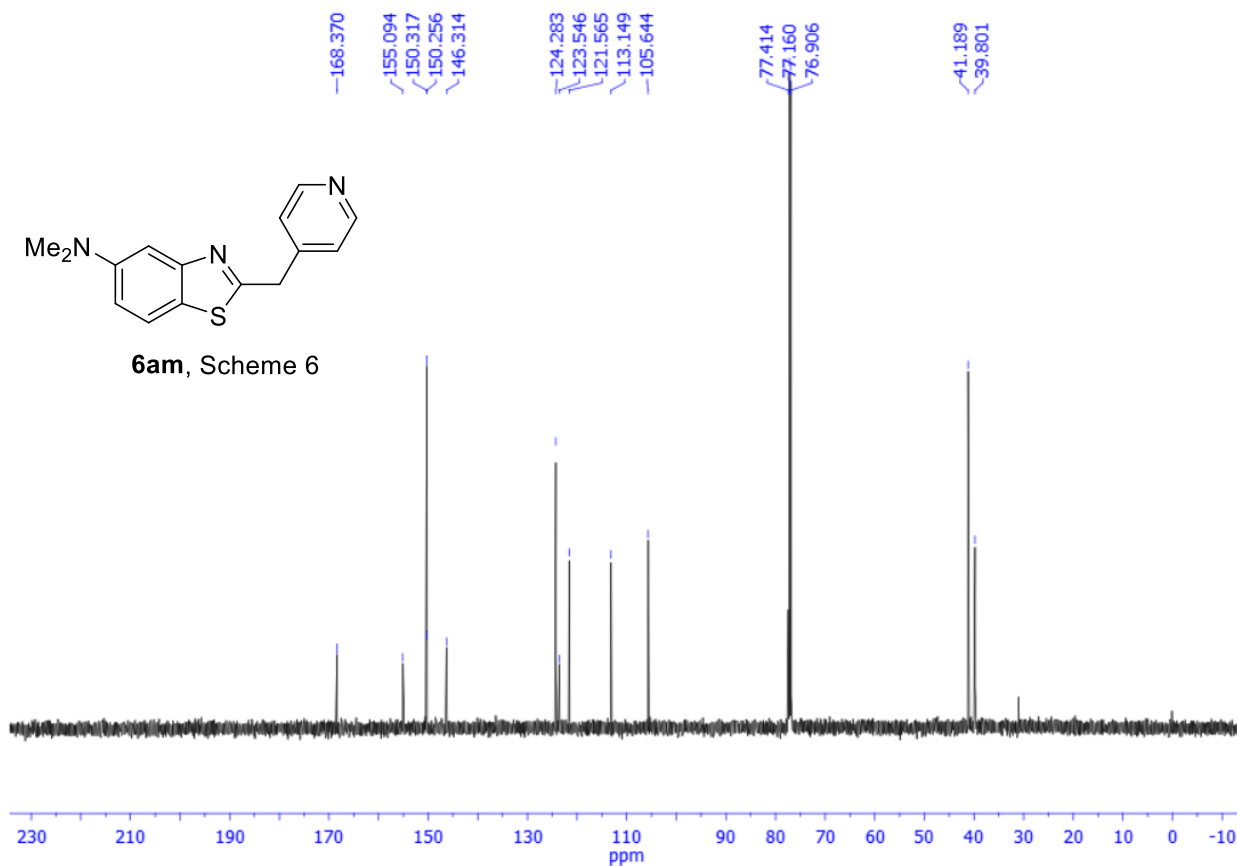

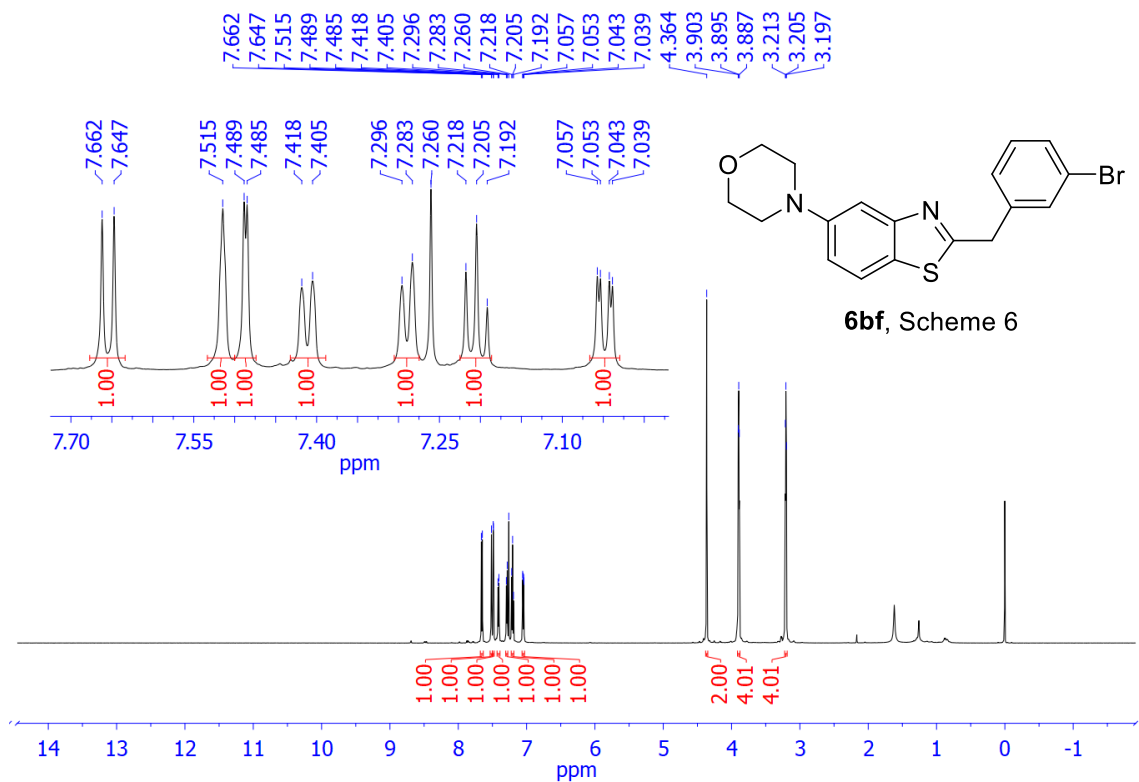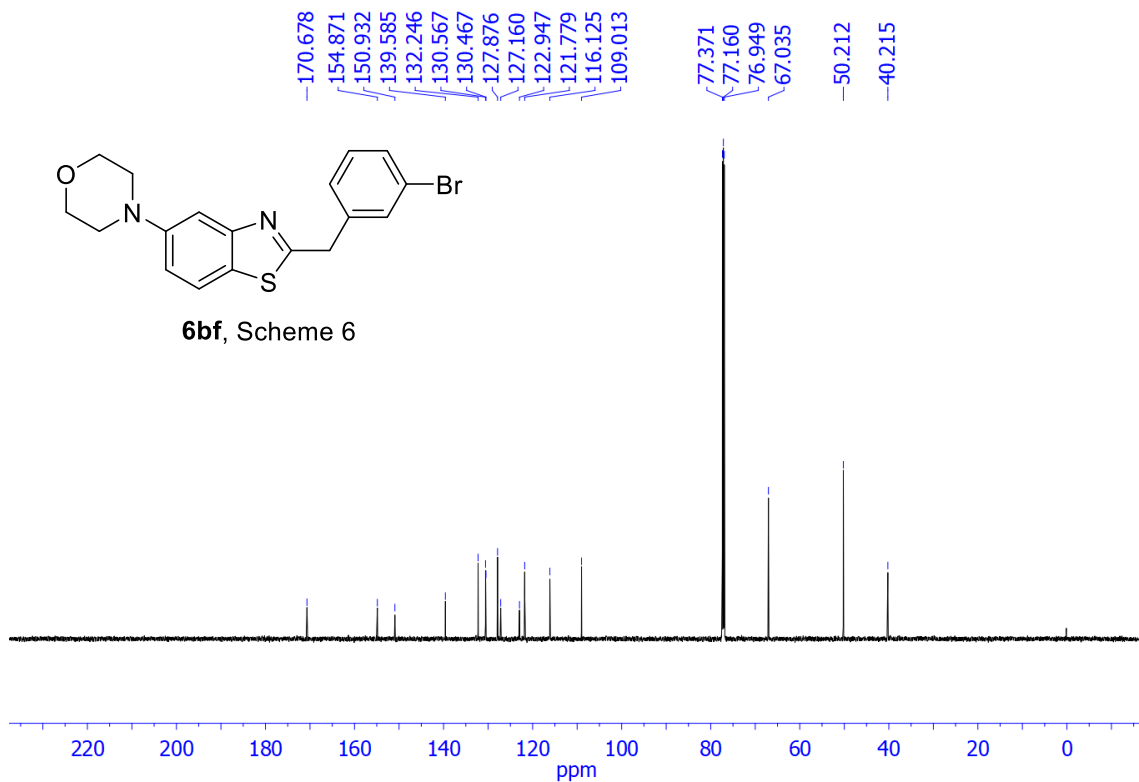



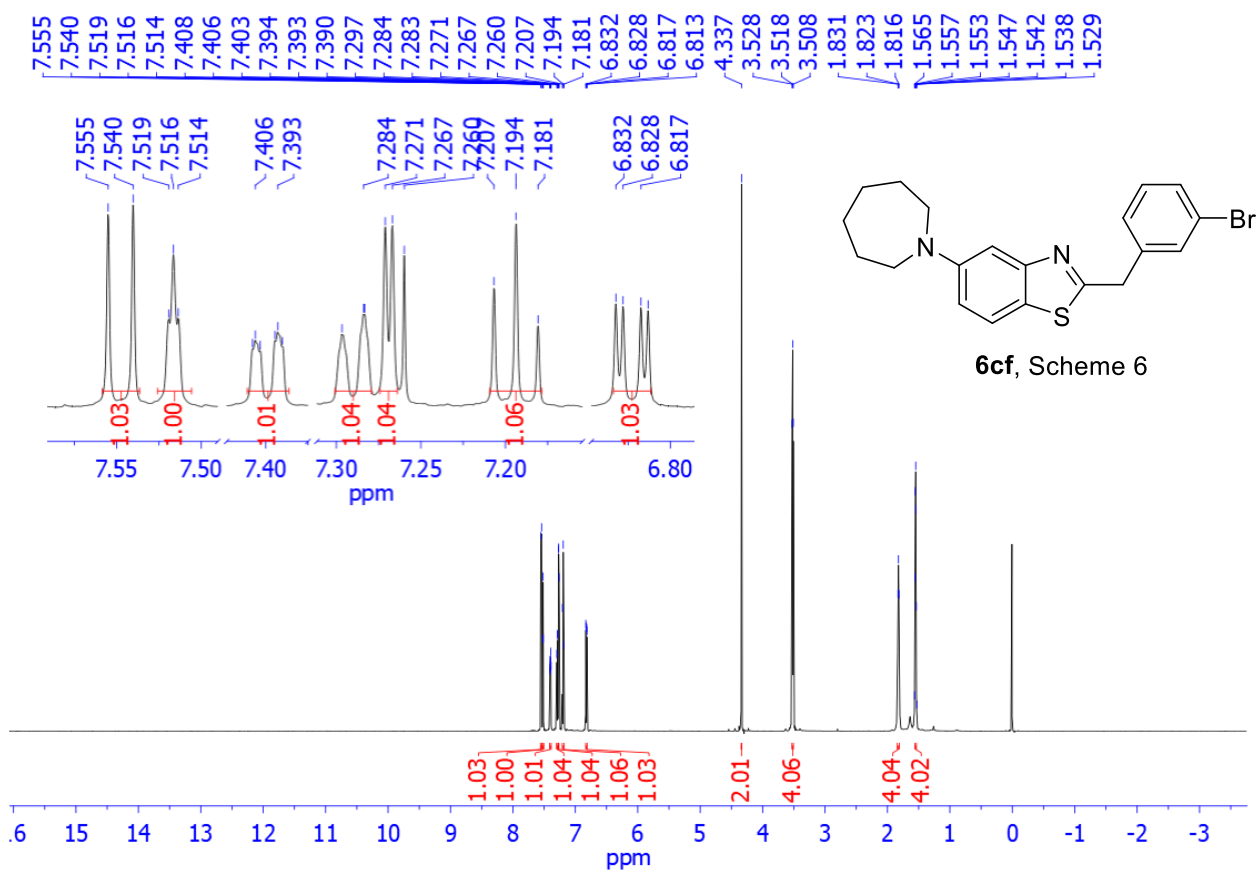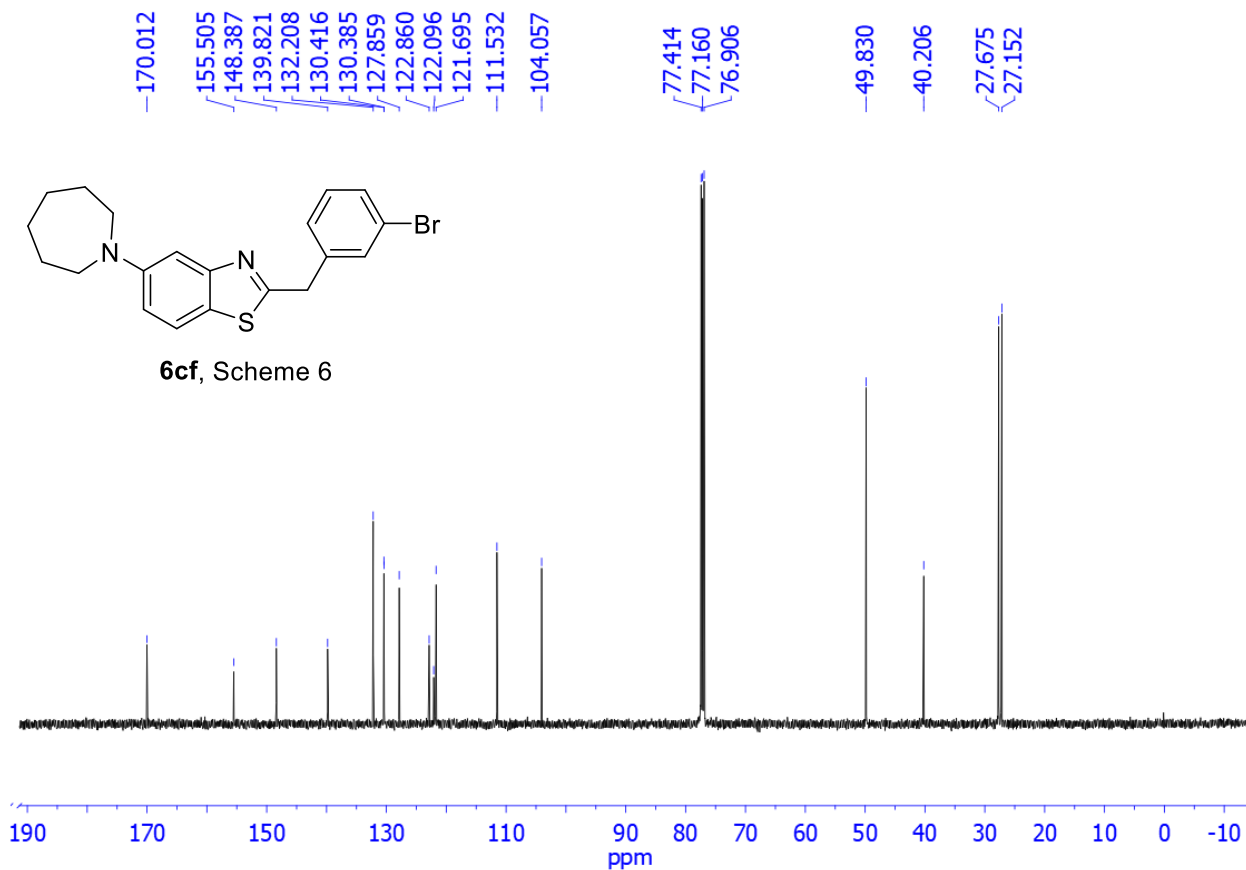

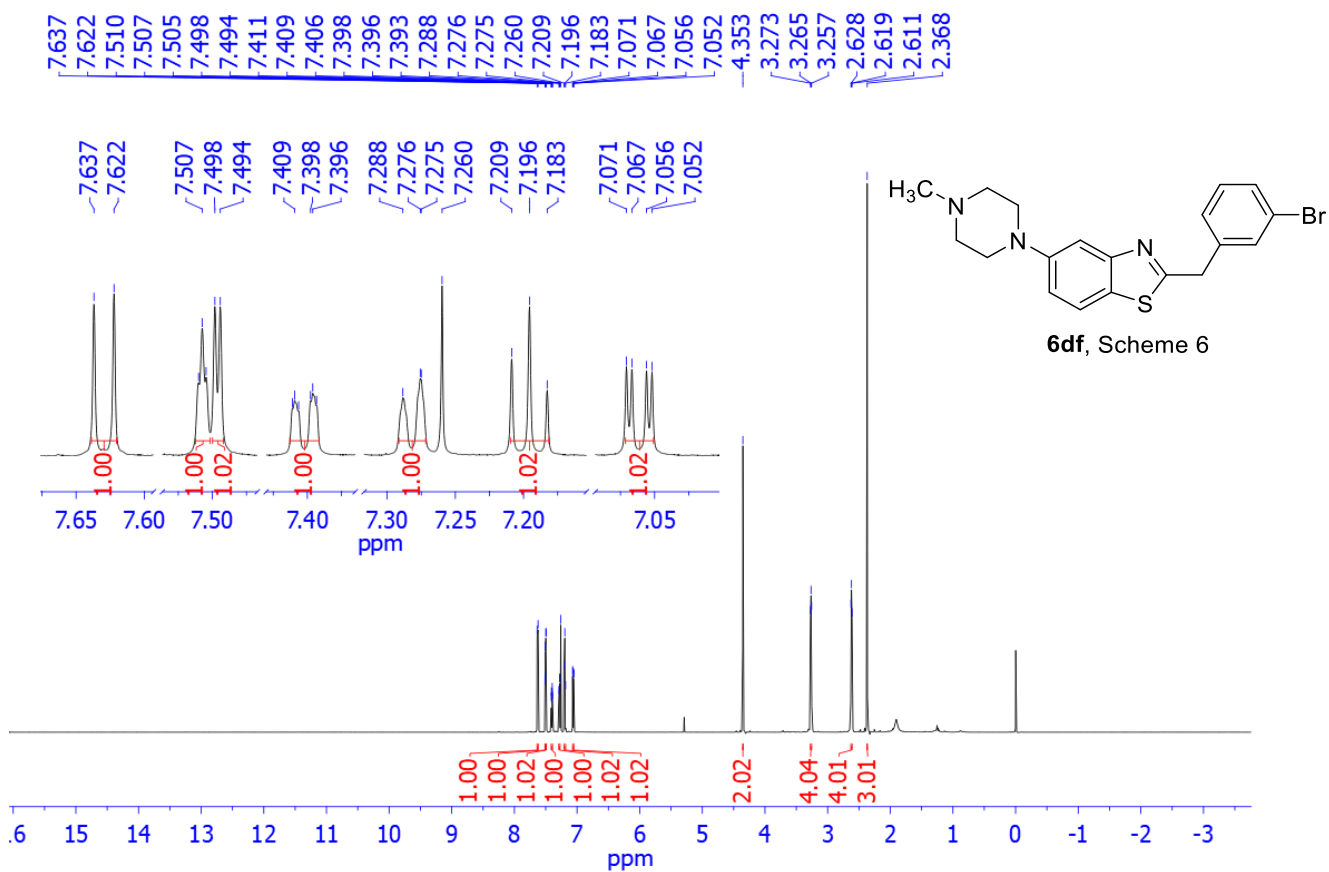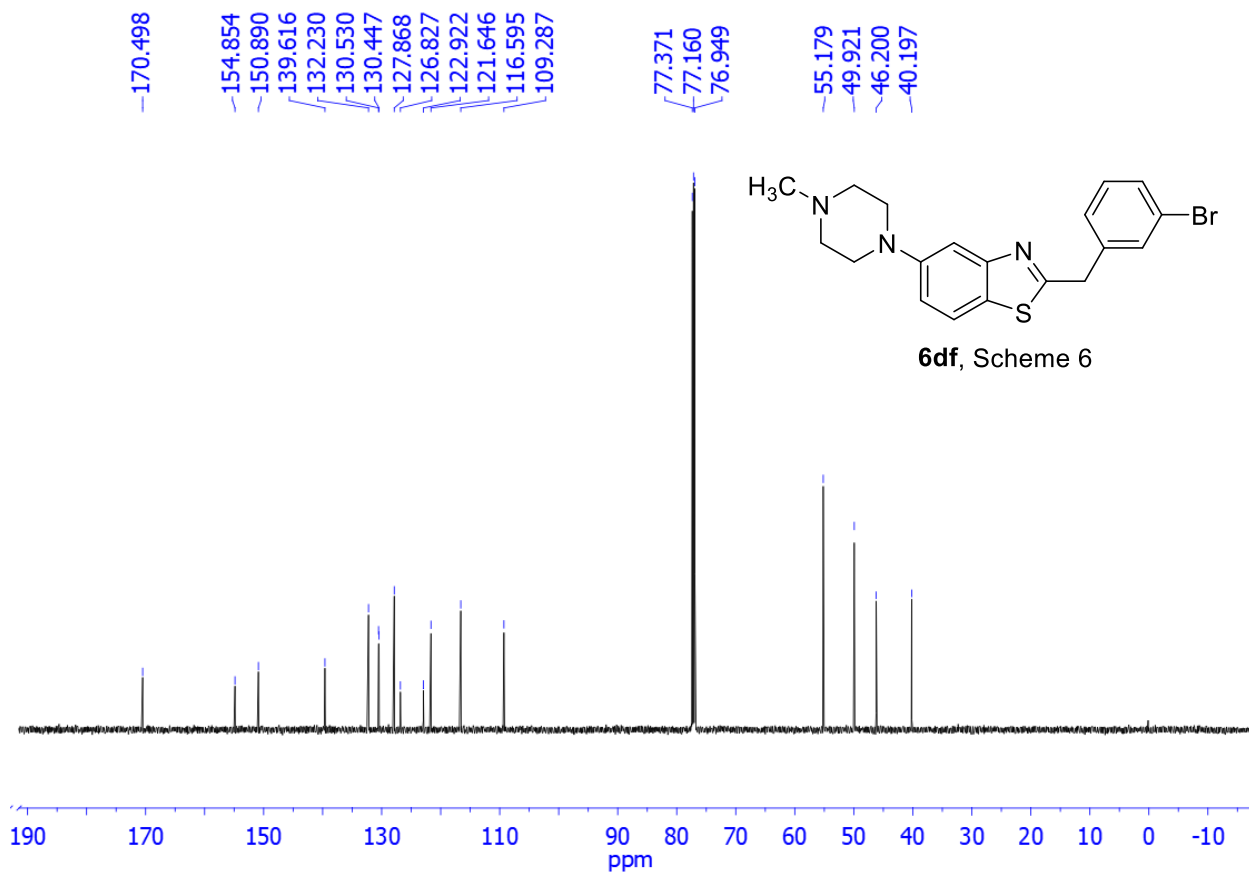

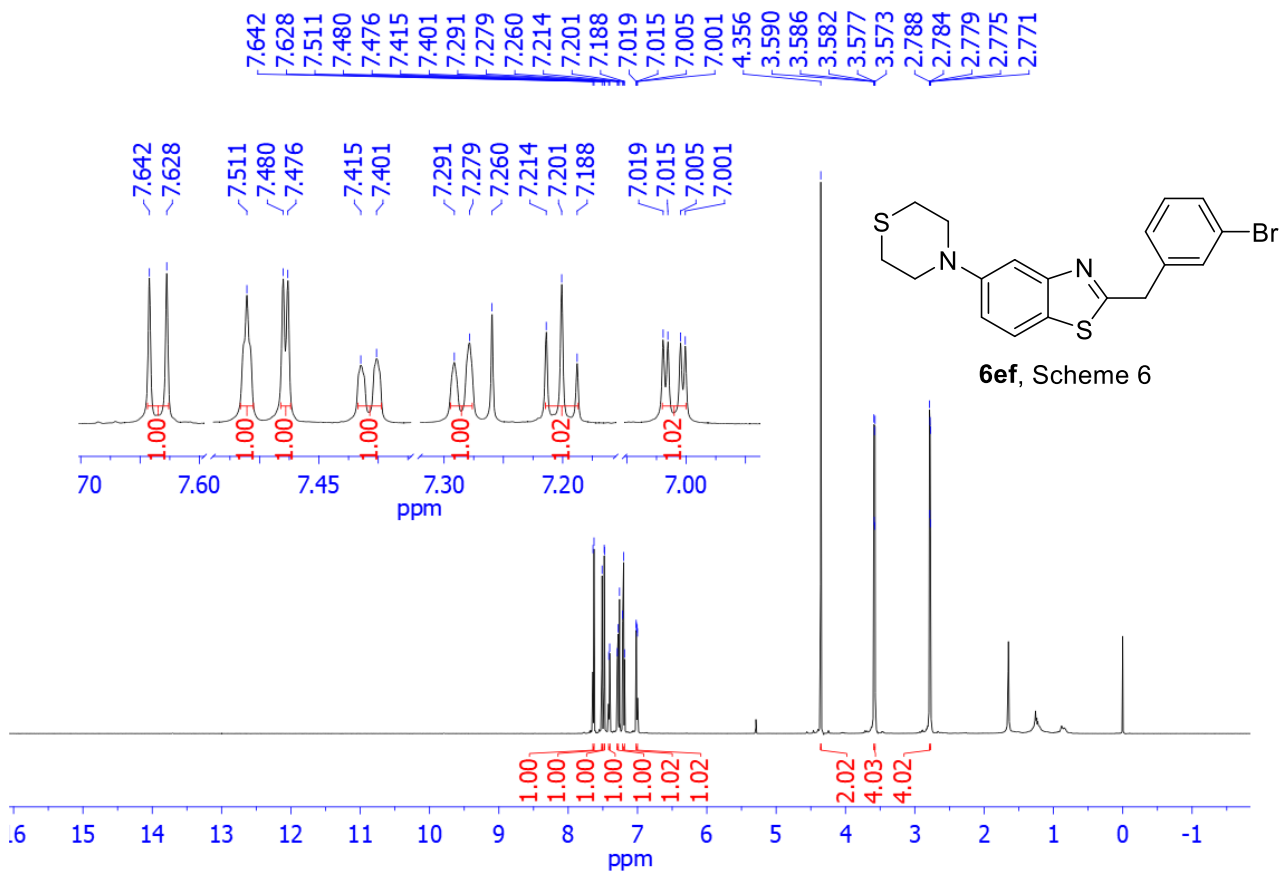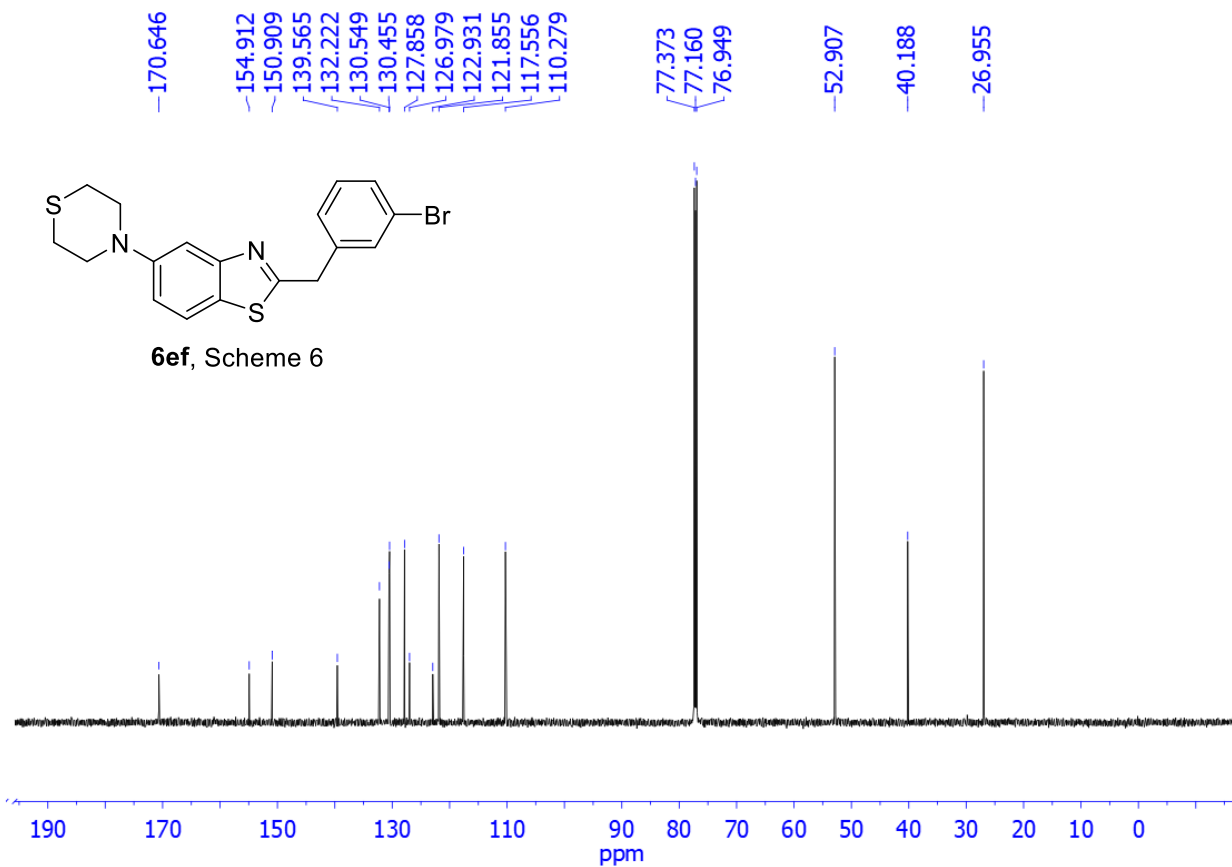

Supplement: d3ob01775c1.pdf [file d3ob01775c1.pdf]
